# Supplementary material for: Prochiral alkyl-aminomethyl ketones as convenient precursors for efficient synthesis of chiral (2,3,5)-tri-substituted pyrrolidines via an organo-catalysed tandem reaction
Source: Royal Society of Chemistry journal article supplement (doi:10.1039/c6ra10153d), 2016-01-01
Supplement: c6ra10153d1.pdf [file c6ra10153d1.pdf]

# Prochiral Alkyl-aminomethyl Ketones as Convenient Precursors for Efficient Synthesis of Chiral (2,3,5)- Tri-substitued Pyrrolidines *via* an Organo-Catalysed Tandem Reaction<sup>†</sup>

Yuming Song,<sup>\*a</sup> Ke Li,<sup>a</sup> Tao Shu,<sup>a</sup> Yamei Xie,<sup>a</sup> Yixin Zhang<sup>a</sup> and Jingping Qu<sup>a</sup>.

<sup>†</sup> State Key Laboratory of Fine Chemicals, School of Pharmaceutical Science and Technology, Dalian University of Technology, Dalian 116024, P. R. China

*song-ym@dlut.edu.cn*

## Supporting information

### Contents:

General

Materials

Determination of Diastereomeric and Enantiomeric Ratios

Crystal Data for compounds

General Procedures

Characterization of compounds

NMR spectra

### General.

The <sup>1</sup>H and <sup>13</sup>C NMR spectra were all recorded using a Bruker AV400 spectrometer (Ettlingen, Germany) operating at 400 MHz for <sup>1</sup>H and 100 MHz for <sup>13</sup>C. The chemical shifts (δ) for <sup>1</sup>H and <sup>13</sup>C are given in ppm relative to residual signals of the solvents (CDCl<sub>3</sub>). Coupling constants are given in Hz. Carbon types were determined from DEPT <sup>13</sup>C NMR experiments. The following abbreviations are used to indicate the multiplicity: s, singlet; d, doublet; t, triplet; q, quartet; m, multiplet; bs, broad signal. Purification of the reaction products was carried out by flash chromatography

(FC) on silica gel (200-300 mesh). High Resolution Mass spectra were obtained from the Dalian University of Technology. X-ray data were acquired on a Bruker APEX-2 diffractometer. All reactions were carried out in air and using distilled solvents, without any precautions to exclude moisture unless otherwise noted.

## Materials.

Commercial grade reagents and solvents were used without further purification; otherwise, where necessary, they were purified as recommended.<sup>1</sup> Chiral and racemic amine catalysts 2-{diphenyl[(trimethylsilyl)oxy]methyl}pyrrolidine were prepared following the literature procedure.<sup>2</sup> Unsaturated aldehydes **1a-j** and were synthesized following the literature procedures.<sup>3-6</sup> Aminoketone **2a-g** were prepared following the literature procedure.<sup>7-9</sup>

## Determination of Diastereomeric Ratios.

The diastereomeric ratio was determined by <sup>1</sup>H NMR analysis of the crude reaction mixture.

## Determination of Enantiomeric Purity.

Chiral HPLC analysis was performed on an Agilent 1100-series instrument. Phenomenex Lux - Amylose 2 and Phenomenex Lux Cellulose 2 columns Daicel Chiralpak AD-H and Daicel Chiralcel OD-H with hexane/*i*-PrOH as the eluent were used. HPLC traces for compounds **3** and corresponding enantiomers, were compared to *quasi* racemic samples.

- 
1. W. L. F. Armarengo, D. D. Perrin, In *Purification of Laboratory Chemicals*, 4th ed.; Butterworth Heinemann: Oxford, 1996.
  2. Marigo, Mauro; Wabnitz, Tobias C.; Fielenbach, Doris; Jorgensen, Karl Anker, *Angewandte Chemie - International Edition*, 2005.
  3. Garayalde, David; Gomez-Bengo, Enrique; Huang, Xiaogen; Goeke, Andreas; Nevado, Cristina, *Journal of the American Chemical Society*, 2010.
  4. Chuang, Ta-Hsien; Chen, Yu-Chi; Pola, Someshwar, *Journal of Organic Chemistry*, 2010.
  5. Tachibana, Sanro; Ito, Kazutaka; Sumimoto, Masashi, *Mokuzai Gakkaishi*, 1989.
  6. Andrea Togninelli, Harsukh Gevariya, Maddalena Alongi and Maurizio Botta, *Tetrahedron Letters*, 2007
  7. Dunn, Nicole L.; Ha, Minji; Radosevich, Alexander T., *Journal of the American Chemical Society*, 2012.
  8. Misra, Raj N.; Xiao, Hai-yun; Kim, Kyoung S., *Journal of Medicinal Chemistry*, 2004.

9. Mastalerz, Harold; Gavai, Ashvinikumar V., *Canadian Journal of Chemistry*, 2006.

## Crystal Data for compound

**Table S1.** Crystallographic data for **3aa**

|                                                                                      | <b>3aa</b>                                        |
|--------------------------------------------------------------------------------------|---------------------------------------------------|
| Formula                                                                              | C <sub>19</sub> H <sub>20</sub> NO <sub>4</sub> S |
| Formula weight                                                                       | 358.42                                            |
| Crystal dimensions (mm <sup>3</sup> )                                                | 0.31 × 0.27 × 0.23                                |
| Crystal system                                                                       | Orthorhombic                                      |
| Space group                                                                          | P2(1)2(1)2(1)                                     |
| a (Å)                                                                                | 7.3097(11)                                        |
| b (Å)                                                                                | 10.0954(15)                                       |
| c (Å)                                                                                | 24.274(4)                                         |
| α (°)                                                                                | 90.00                                             |
| β (°)                                                                                | 90.00                                             |
| γ (°)                                                                                | 90.00                                             |
| Volume (Å <sup>3</sup> )                                                             | 1791.2(5)                                         |
| Z                                                                                    | 4                                                 |
| T (K)                                                                                | 298(2)                                            |
| D <sub>calcd</sub> (g cm <sup>-3</sup> )                                             | 1.329                                             |
| μ (mm <sup>-1</sup> )                                                                | 0.204                                             |
| F (000)                                                                              | 756                                               |
| No. of rflns. collected                                                              | 8108                                              |
| No. of indep. rflns. /R <sub>int</sub>                                               | 3156 / 0.0187                                     |
| No. of obsd. rflns. [I <sub>0</sub> > 2σ(I <sub>0</sub> )]                           | 2972                                              |
| Data / restraints / parameters                                                       | 3156 / 0 / 226                                    |
| R <sub>1</sub> / wR <sub>2</sub> [I <sub>0</sub> > 2σ(I <sub>0</sub> )] <sup>a</sup> | 0.0323 / 0.0890                                   |
| R <sub>1</sub> / wR <sub>2</sub> (all data) <sup>a</sup>                             | 0.0353 / 0.0890                                   |
| GOF (on F <sup>2</sup> ) <sup>a</sup>                                                | 1.041                                             |
| Largest diff. peak and hole (e Å <sup>-3</sup> )                                     | 0.228 / -0.245                                    |

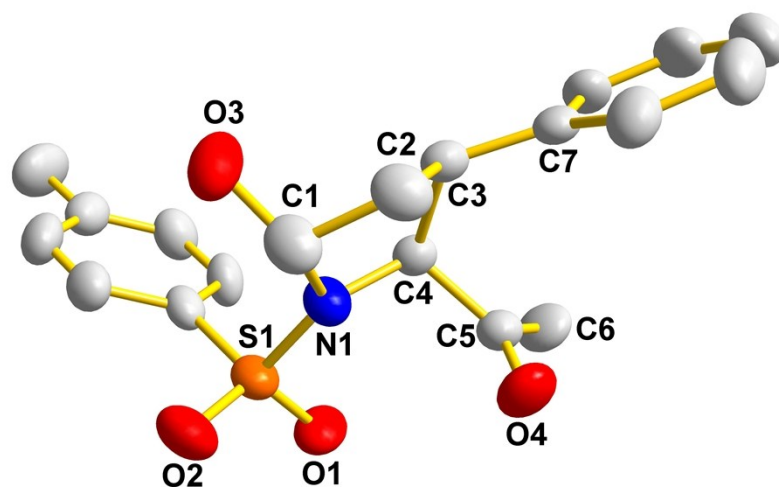

**Table S2.** Selected bond distances (Å) and bond angles (°) for **3aa**

|               |            |          |            |
|---------------|------------|----------|------------|
| Distances (Å) |            |          |            |
| N1–C1         | 1.458(3)   | O4–C5    | 1.203(2)   |
| N1–C4         | 1.475(2)   | C1–C2    | 1.507(3)   |
| N1–S1         | 1.6186(16) | C2–C3    | 1.536(3)   |
| S1–O1         | 1.4307(16) | C3–C7    | 1.508(3)   |
| S1–O2         | 1.4378(15) | C3–C4    | 1.568(3)   |
| S1–C13        | 1.753(2)   | C4–C5    | 1.530(3)   |
| O3–C1         | 1.422(3)   | C5–C6    | 1.483(3)   |
| Angles (°)    |            |          |            |
| O1–S1–O2      | 119.87(11) | N1–C1–C2 | 100.82(17) |
| O1–S1–N1      | 107.03(9)  | C1–C2–C3 | 102.80(16) |
| O2–S1–N1      | 105.24(9)  | C7–C3–C2 | 117.07(16) |
| O1–S1–C13     | 108.66(10) | C7–C3–C4 | 116.60(16) |
| O2–S1–C13     | 106.81(9)  | C2–C3–C4 | 102.49(15) |
| N1–S1–C13     | 108.82(9)  | N1–C4–C5 | 110.99(15) |
| C1–N1–C4      | 113.19(15) | N1–C4–C3 | 101.78(14) |
| C1–N1–S1      | 122.78(14) | C5–C4–C3 | 112.53(15) |
| C4–N1–S1      | 121.33(12) | O4–C5–C6 | 122.63(19) |
| O3–C1–N1      | 109.02(18) | O4–C5–C4 | 120.25(18) |
| O3–C1–C2      | 112.78(19) | C6–C5–C4 | 117.11(16) |

**Table S3.** Crystallographic data for **3aa'**

|                                                                                      | <b>3j<sub>2</sub></b>                                 |
|--------------------------------------------------------------------------------------|-------------------------------------------------------|
| Formula                                                                              | C <sub>19</sub> H <sub>22.5</sub> NO <sub>4.5</sub> S |
| Formula weight                                                                       | 368.94                                                |
| Crystal dimensions (mm <sup>3</sup> )                                                | 0.29 × 0.14 × 0.15                                    |
| Crystal system                                                                       | Orthorhombic                                          |
| Space group                                                                          | P2(1)2(1)2(1)                                         |
| a (Å)                                                                                | 10.156(3)                                             |
| b (Å)                                                                                | 17.874(5)                                             |
| c (Å)                                                                                | 20.771(6)                                             |
| α (°)                                                                                | 90.00                                                 |
| β (°)                                                                                | 90.00                                                 |
| γ (°)                                                                                | 90.00                                                 |
| Volume (Å <sup>3</sup> )                                                             | 3770.6(18)                                            |
| Z                                                                                    | 8                                                     |
| T (K)                                                                                | 298(2)                                                |
| D <sub>calcd</sub> (g cm <sup>-3</sup> )                                             | 1.300                                                 |
| μ (mm <sup>-1</sup> )                                                                | 0.197                                                 |
| F (000)                                                                              | 1564                                                  |
| No. of rflns. collected                                                              | 21290                                                 |
| No. of indep. rflns. /R <sub>int</sub>                                               | 6643 / 0.0705                                         |
| No. of obsd. rflns. [I <sub>0</sub> > 2σ(I <sub>0</sub> )]                           | 4203                                                  |
| Data / restraints / parameters                                                       | 6643 / 0 / 451                                        |
| R <sub>1</sub> / wR <sub>2</sub> [I <sub>0</sub> > 2σ(I <sub>0</sub> )] <sup>a</sup> | 0.0585 / 0.1402                                       |
| R <sub>1</sub> / wR <sub>2</sub> (all data) <sup>a</sup>                             | 0.1043 / 0.1594                                       |
| GOF (on F <sup>2</sup> ) <sup>a</sup>                                                | 1.006                                                 |
| Largest diff. peak and hole (e Å <sup>-3</sup> )                                     | 0.194/ -0.384                                         |

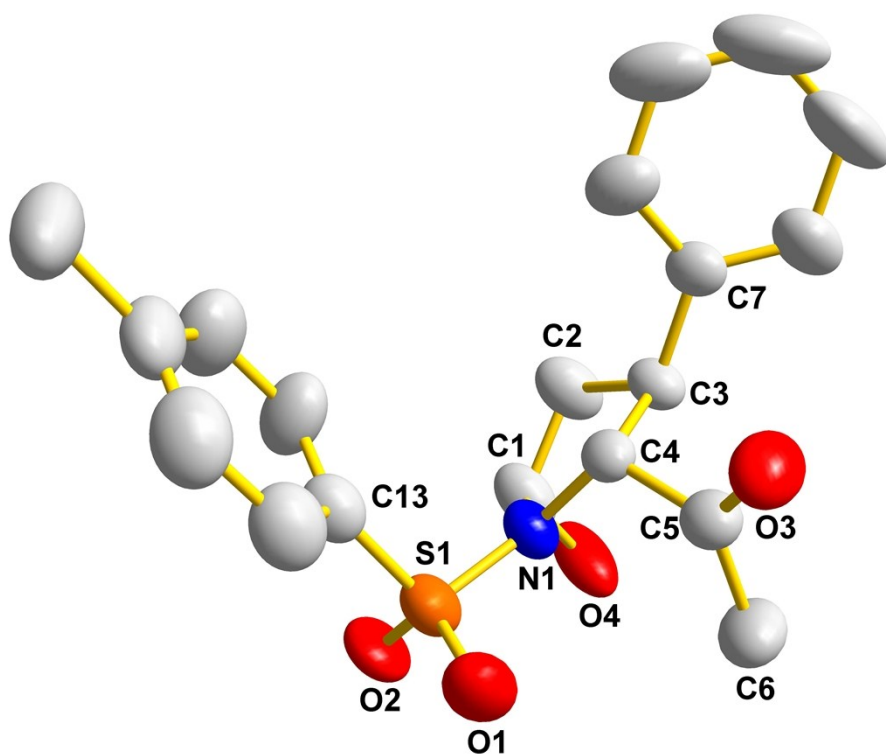

**Table S4.** Selected bond distances (Å) and bond angles (°) for **3aa'**

| Distances (Å) |            |          |            |
|---------------|------------|----------|------------|
| S1–O1         | 1.427(3)   | O4–C1    | 1.412(4)   |
| S1–O2         | 1.428(3)   | N1–C1    | 1.476(5)   |
| S1–N1         | 1.612(2)   | N1–C4    | 1.481(4)   |
| S1–C13        | 1.744(5)   | C3–C7    | 1.515(6)   |
| O3–C5         | 1.207(5)   |          |            |
| Angles (°)    |            |          |            |
| O1–S1–O2      | 119.4(2)   | N1–C1–C2 | 102.37(18) |
| O1–S1–N1      | 107.75(17) | C1–C2–C3 | 105.2(4)   |
| O2–S1–N1      | 105.76(16) | C7–C3–C2 | 115.9(4)   |
| O1–S1–C13     | 106.9(2)   | C7–C3–C4 | 114.0(3)   |
| O2–S1–C13     | 109.6(2)   | C2–C3–C4 | 103.0(3)   |
| N1–S1–C13     | 106.82(19) | N1–C4–C5 | 115.2(3)   |
| C1–N1–C4      | 112.74(17) | N1–C4–C3 | 102.8(3)   |
| C1–N1–S1      | 121.69(8)  | C5–C4–C3 | 108.8(3)   |
| C4–N1–S1      | 121.4(2)   | O3–C5–C6 | 121.7(4)   |
| O4–C1–N1      | 110.37(17) | O3–C5–C4 | 118.5(4)   |
| O4–C1–C2      | 110.6(3)   | C6–C5–C4 | 119.7(4)   |

## General Procedure

### The preparation racemic products

(R,S)-2-{diphenyl[(trimethylsilyl)oxy]methyl}pyrrolidine (0.02 mmol, 13 mg, 10 mol%) was dissolved in 1 mL of CH<sub>2</sub>Cl<sub>2</sub> and benzoic acid (0.04 mmol, 5 mg, 20 mol%) was added in an ordinary vial equipped with a Teflon-coated stir bar. The resulting solution was stirred at room temperature for 20 minutes, then  $\alpha,\beta$ -unsaturated aldehyde (0.2 mmol) and aminoketone (0.25mmol) were added. The vial was stirring continued at room temperature for 48 hours. The crude mixture was flushed through a short plug of silica.

### General Procedure for chiral pyrrolidines synthesis

(R)-2-{diphenyl[(trimethylsilyl)oxy]methyl}pyrrolidine (0.08 mmol, 26 mg, 20 mol%) was dissolved in 2.0 mL of CH<sub>2</sub>Cl<sub>2</sub> and 4-Bromobenzene carboxylic acid (0.08 mmol, 16 mg, 20 mol%) was added in an ordinary vial equipped with a Teflon-coated stir bar. The resulting solution was stirred at room temperature for 20 minutes, then  $\alpha,\beta$ -unsaturated aldehyde (0.4 mmol) and aminoketone (0.5 mmol) was added. The vial was stirring continued at room temperature for 96 hours. The crude mixture was flushed through a short plug of silica. Solvent was removed in *vacuo* and the diastereomeric ratio (dr) was determined by <sup>1</sup>H NMR analysis of the crude mixture. The desired compound was isolated by flash column chromatography.

### 1-((2S,3S)-5-hydroxy-3-phenyl-1-tosylpyrrolidin-2-yl)ethanone (**3aa**) and 1-((2S,3R,5S)-5-hydroxy-3-phenyl-1-tosylpyrrolidin-2-yl)ethanone (**3aa'**)

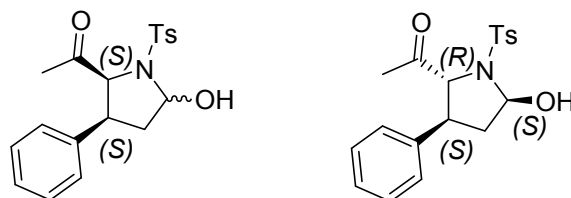

**3aa**

**3aa'**

Chiral amine catalyst 2-{diphenyl[(trimethylsilyl)oxy]methyl}pyrrolidine (0.04mmol., 13 mg, 10 mol%) was dissolved in 2.0 mL of CH<sub>2</sub>Cl<sub>2</sub> and benzoic acid (0.08mmol., 10 mg, 20 mol%) was added in an ordinary vial equipped with a Teflon-coated stir bar. The resulting solution was stirred at room temperature for 20 minutes, then cinnamaldehyde (0.4mmol) and 4-methyl-N-(2-oxopropyl)benzene-sulfonamide (0.5mmol) was added. The vial was stirring continued at room temperature for 96 hours. The crude mixture was flushed through a short plug of silica. Solvent was removed in *vacuo*. After flash column chromatography (hexane/ethyl acetate =4/1) 2,3-*cis* isomer **3aa**, (71.9 mg, 49 % yield, Mp. 135-136 °C, dr=5:4 and 99% ee (Fc-ester)) and 2,3-*trans* isomer **3aa'** (56.0 mg, 40% yield, Mp. 141-142 °C, 99% ee) were obtained as amorphous solids. The dr and ee of **3aa** were determined by <sup>1</sup>H NMR and HPLC analysis respectively. (Daicel Chiralcel OD-H column: hexane/*i*-PrOH 80:20, flow rate 0.80 mL/min,  $\lambda$  = 254.0 nm:  $\tau_{major}$  = 24.9 min;  $\tau_{minor}$  = 14.7 min). <sup>1</sup>H NMR



(400 MHz, CDCl<sub>3</sub>): 7.73-7.77 (t, J = 8.4 Hz, 2H), 7.28-7.32 (m, 5H), 7.14-7.16 (d, J = 7.4 Hz, 2H), 5.68-5.69, 5.74-5.76 (d, 1H), 4.68-4.70, 4.86-4.88 (d, 1H), 4.17-4.21, 3.51-3.58 (m, 1H), 3.90-3.92, 3.66 (m, 1H), 2.53,2.64 (m, 1H), 2.43 (d, 3H), 2.05-2.09 (m, 1H), 1.59-1.66 (s, 1H), 1.43 (s, 2H). <sup>13</sup>C NMR (400 MHz, CDCl<sub>3</sub>): 208.3, 205.9, 144.0, 136.7, 136.6, 134.8, 134.7, 129.8, 129.6, 129.0, 128.9, 128.2, 128.1, 128.0, 127.9, 127.5, 127.4, 84.7, 83.1, 69.9, 69.5, 58.5, 47.2, 45.2, 38.0, 36.5, 29.8, 29.7, 21.6, 18.4. HRMS: ESI ORBITRAP (+) m/z: calculated for C<sub>19</sub>H<sub>21</sub>NO<sub>4</sub>S 359.1191, found [M+Na]<sup>+</sup> 382.1079.

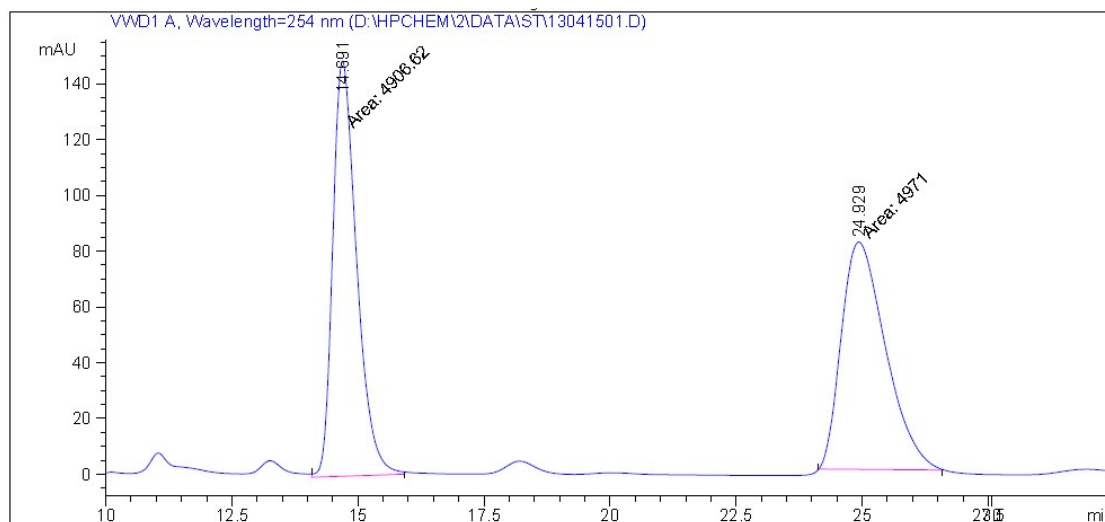

| Peak # | RetTime [min] | Type | Width [min] | Area mAU*s | Height [mAU] | Area %  |
|--------|---------------|------|-------------|------------|--------------|---------|
| 1      | 14.691        | MM T | 0.5492      | 4906.62158 | 148.89233    | 49.6741 |
| 2      | 24.929        | MM T | 1.0163      | 4971.00098 | 81.52493     | 50.3259 |

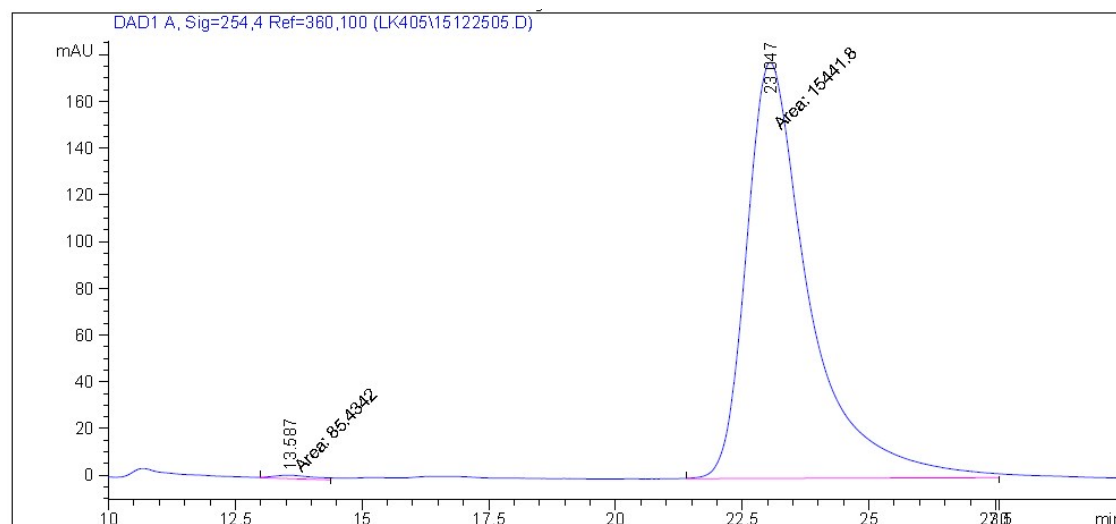

| Peak # | RetTime [min] | Type | Width [min] | Area [mAU*s] | Height [mAU] | Area %  |
|--------|---------------|------|-------------|--------------|--------------|---------|
| 1      | 13.587        | MM T | 0.9380      | 85.43424     | 1.51808      | 0.5502  |
| 2      | 23.047        | MM T | 1.4458      | 1.54418e4    | 178.00536    | 99.4498 |

The ee of **3aa'** was determined by HPLC analysis on a Daicel Chiralcel OD-H column: hexane/*i*-PrOH 80:20, flow rate 0.80 mL/min,  $\lambda = 254.0$  nm:  $\tau_{minor} = 12.0$  min  $\tau_{major} = 14.4$  min.  $^1\text{H}$  NMR (400 MHz,  $\text{CDCl}_3$ ): 7.73 (d,  $J = 8.3$  Hz, 2H), 7.35 (d,  $J = 8.1$  Hz, 2H), 7.23 (td,  $J = 5.5, 2.7$  Hz, 2H), 6.97 (dd,  $J = 7.4, 2.0$  Hz, 2H), 5.61 (d,  $J = 5.4$  Hz, 1H), 3.98 (d,  $J = 8.9$  Hz, 1H), 3.66 (ddd,  $J = 11.3, 8.8, 6.7$  Hz, 1H), 3.35 (s, 1H), 2.47 (s, 3H), 2.37 (s, 3H), 2.25 (dd,  $J = 13.2, 6.7$  Hz, 1H), 1.83 (ddd,  $J = 13.1, 11.4, 5.6$  Hz, 1H).  $^{13}\text{C}$  NMR (400 MHz,  $\text{CDCl}_3$ ): 206.9, 144.5, 138.0, 134.8, 130.1, 128.9, 127.7, 127.3, 127.2, 84.8, 77.4, 77.1, 76.7, 74.4, 46.6, 41.4, 25.5, 21.6. HRMS ESI ORBITRAP (+) m/z: calculated for  $\text{C}_{19}\text{H}_{21}\text{NO}_4\text{S}$  359.1191, found  $[\text{M}+\text{Na}]^+$  382.1079.

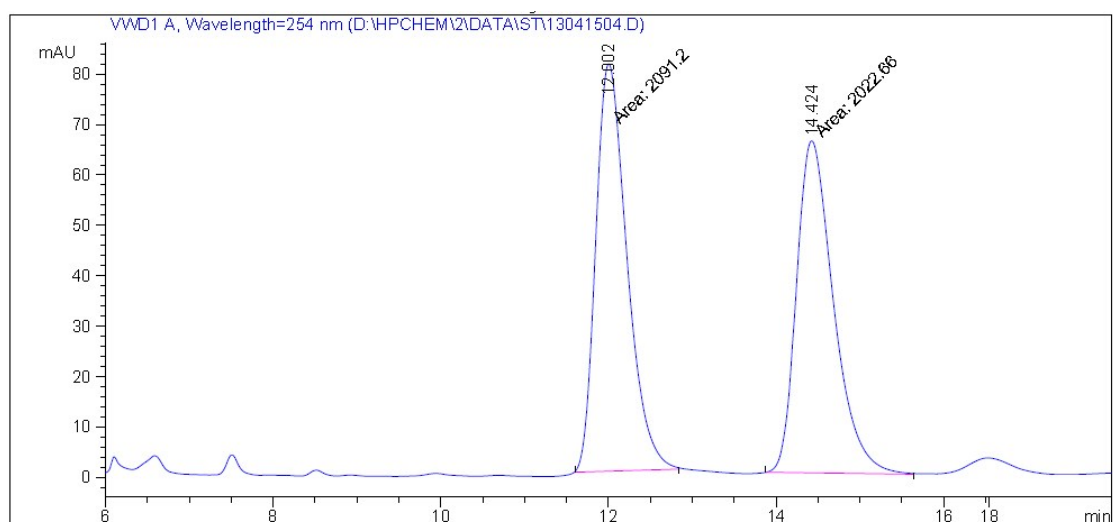

| Peak # | RetTime [min] | Type | Width [min] | Area mAU *s | Height [mAU] | Area %  |
|--------|---------------|------|-------------|-------------|--------------|---------|
| 1      | 12.002        | MM T | 0.4311      | 2091.19702  | 80.84360     | 50.8329 |
| 2      | 14.424        | MM T | 0.5116      | 2022.66431  | 65.88905     | 49.1671 |

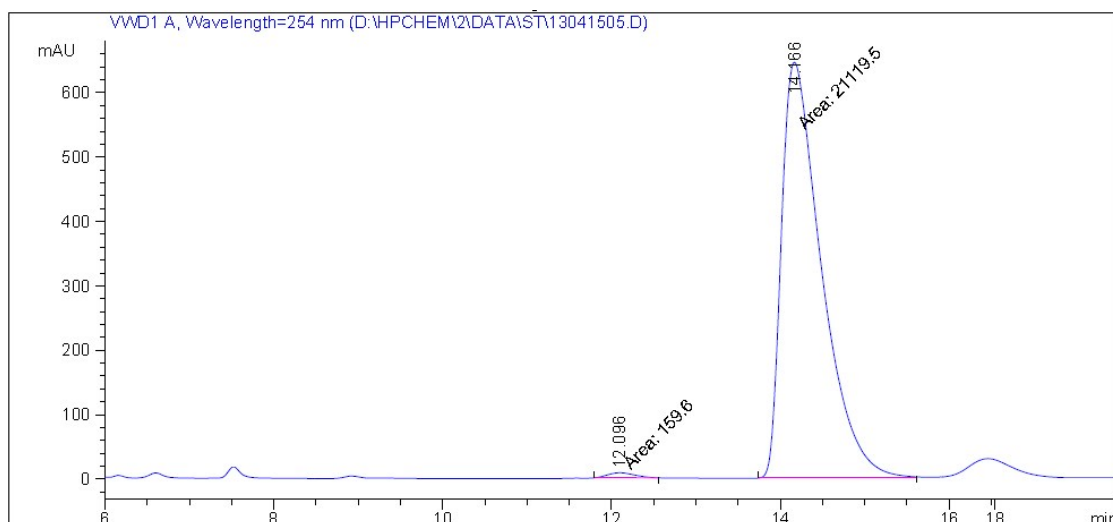

| Peak # | RetTime [min] | Type | Width [min] | Area mAU *s | Height [mAU] | Area %  |
|--------|---------------|------|-------------|-------------|--------------|---------|
| 1      | 12.096        | MM T | 0.3532      | 159.60040   | 7.53023      | 0.7500  |
| 2      | 14.166        | MM T | 0.5459      | 2.11195e4   | 644.74634    | 99.2500 |

**1-((2S,3S,5R)-5-hydroxy-3-phenyl-1-tosylpyrrolidin-2-yl)-2,2-dimethylpropan-1-one (3af)**

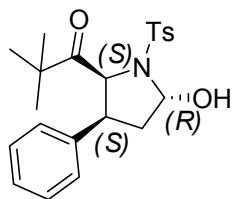

Chiral amine catalyst 2-{diphenyl[(trimethylsilyl)oxy]methyl}pyrrolidine (0.08mmol., 26mg, 20mol%) was dissolved in 2.0 mL of CH<sub>2</sub>Cl<sub>2</sub> and 4-bromobenzene carboxylic acid (0.08mmol., 16mg, 20mol%) was added in an ordinary vial equipped with a Teflon-coated stir bar . The resulting solution was stirred at room temperature for 20 minutes, then cinnamaldehyde (0.4mmol) and N-(3,3-dimethyl-2-oxidanilidene-butyl)-4-methyl-benzenesulfonamide (0.5mmol) was added. The vial was stirring continued at room temperature for 96 hours. The crude mixture was flushed through a short plug of silica. Solvent was removed in *vacuo*. After flash column chromatography (hexane/ethyl acetate =4/1) **3af** was obtained as amorphous solid (120.3mg, 75% yield, dr=8:1 and 98% ee). The dr was determined by <sup>1</sup>H NMR and the ee was determined by HPLC analysis on a Daicel Chiralcel OD-H column: hexane/*i*-PrOH 70:30, flow rate 0.60 mL/min, λ = 254.0 nm: τ<sub>major</sub> = 14.2 min, τ<sub>minor</sub> = 12.0 min. HRMS ESI ORBITRAP (+) m/z: calculated for C<sub>22</sub>H<sub>27</sub>NO<sub>4</sub>S 401.1661, found 424.1562 [M+Na]<sup>+</sup>. <sup>1</sup>H NMR (400 MHz, CDCl<sub>3</sub>): 7.76 (d, *J* = 8.3 Hz, 2H), 7.32 – 7.27 (m, 4H), 7.08 (dd, *J* = 7.7, 1.5 Hz, 2H), 5.84 (s, 1H), 5.08 (d, *J* = 4.5 Hz, 1H), 4.23 (s, 1H), 3.30 (td, *J* = 7.7, 4.5 Hz, 1H), 2.44 (s, 3H), 2.35 (ddd, *J* = 13.6, 8.1, 2.1 Hz, 1H), 2.27 – 2.18 (m, 1H), 1.02 (s, 9H). <sup>13</sup>C NMR (400 MHz, CDCl<sub>3</sub>): 216.3, 143.8, 141.6, 137.1, 129.6, 129.1, 127.6, 127.4, 126.9, 85.2, 68.2, 49.3, 45.6, 43.6, 26.5, 21.6. Mp (°C): 178-179.

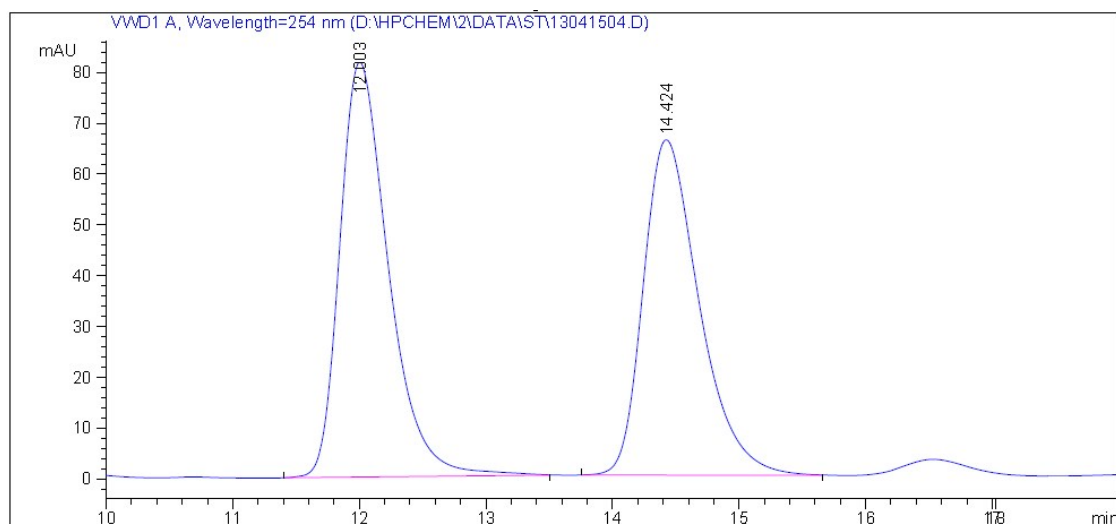

| Peak # | RetTime [min] | Type | Width [min] | Area mAU * s | Height [mAU] | Area %  |
|--------|---------------|------|-------------|--------------|--------------|---------|
| 1      | 12.003        | BB   | 0.4099      | 2187.18628   | 81.70230     | 51.8396 |
| 2      | 14.424        | BB   | 0.4725      | 2031.95251   | 66.03831     | 48.1604 |

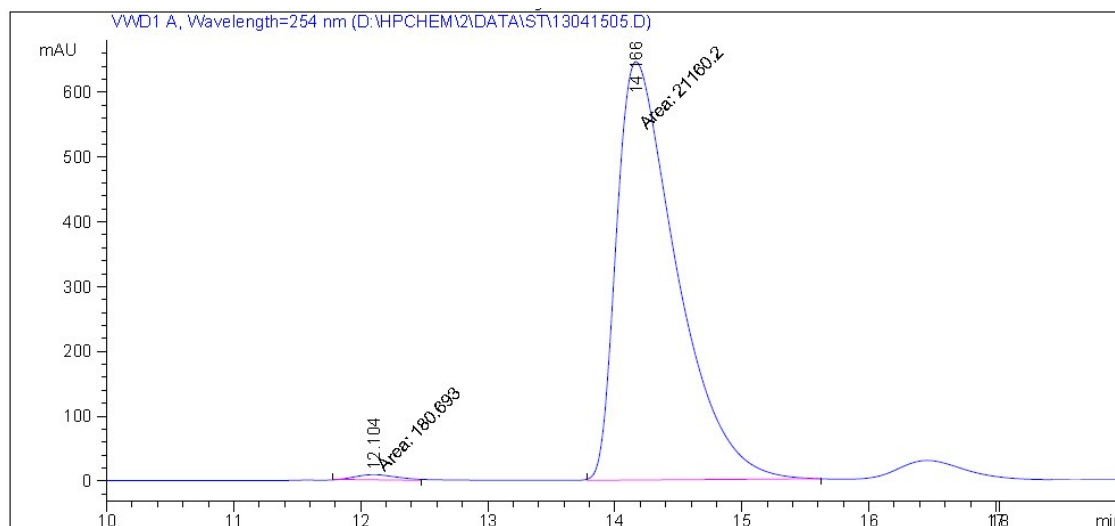

| Peak # | RetTime [min] | Type | Width [min] | Area mAU *s | Height [mAU] | Area %  |
|--------|---------------|------|-------------|-------------|--------------|---------|
| 1      | 12.104        | MM T | 0.3750      | 180.69328   | 8.03170      | 0.8467  |
| 2      | 14.166        | MM T | 0.5461      | 2.11602e4   | 645.84796    | 99.1533 |

#### 4-((2S,3S,5R)-5-hydroxy-2-pivaloyl-1-tosylpyrrolidin-3-yl)benzonitrile (**3bf**)

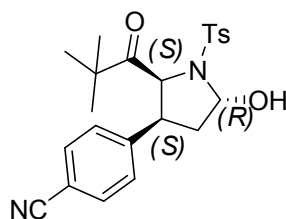

Chiral amine catalyst 2- $\{$ diphenyl[(trimethylsilyl)oxy]methyl $\}$ pyrrolidine (0.08mmol., 26mg, 20mol%) was dissolved in 2.0 mL of  $\text{CH}_2\text{Cl}_2$  and 4-bromobenzene carboxylic acid (0.08mmol, 16mg, 20mol%) was added in an ordinary vial equipped with a Teflon-coated stir bar. The resulting solution was stirred at room temperature for 20 minutes, then 4-cyanocinnamaldehyde (0.4mmol) and N-(3,3-dimethyl-2-oxidanylidene-butyl)-4-methyl-benzenesulfonamide (0.5mmol) was added. The vial was stirring continued at room temperature for 96 hours. The crude mixture was flushed through a short plug of silica. Solvent was removed in *vacuo*. After flash column chromatography (hexane/ethyl acetate =4/1) **3bf** was obtained an amorphous solid (135.2 mg, 79 % yield, dr = 15:1 and 99% ee.  $^1\text{H}$  NMR (400 MHz,  $\text{CDCl}_3$ ): 7.74 (d,  $J = 8.4$  Hz, 2H), 7.61 (d,  $J = 8.4$  Hz, 2H), 7.30 (d,  $J = 8.0$  Hz, 2H), 7.24 (d,  $J = 8.4$  Hz, 2H), 5.87-5.91 (m, 1H), 5.07 (d,  $J = 4.0$  Hz, 1H), 4.28 (d,  $J = 9.6$  Hz, 1H), 3.32-3.37 (m, 1H), 2.45 (s, 3H), 2.38-2.42 (m, 1H), 2.23-2.30 (m, 1H), 1.03 (s, 9H).  $^{13}\text{C}$  NMR (400 MHz,  $\text{CDCl}_3$ ): 215.3, 147.2, 144.1, 136.8, 133.0, 129.6, 127.7, 127.4, 118.3, 111.6, 85.1, 67.6, 48.9, 45.0, 43.7, 26.4, 21.6. Daicel Chiralcel OD-H column: hexane/*i*-PrOH 80:20, flow rate 0.80 mL/min,  $\lambda = 254.0$  nm:  $\tau_{\text{major}} = 20.5$  min,  $\tau_{\text{minor}} = 24.4$  min. HRMS ESI ORBITRAP (+) m/z: calculated for  $\text{C}_{23}\text{H}_{26}\text{N}_2\text{O}_4\text{S}$  426.1613, found  $[\text{M}+\text{Na}]^+$  449.1507. Mp. 147-148  $^\circ\text{C}$ .

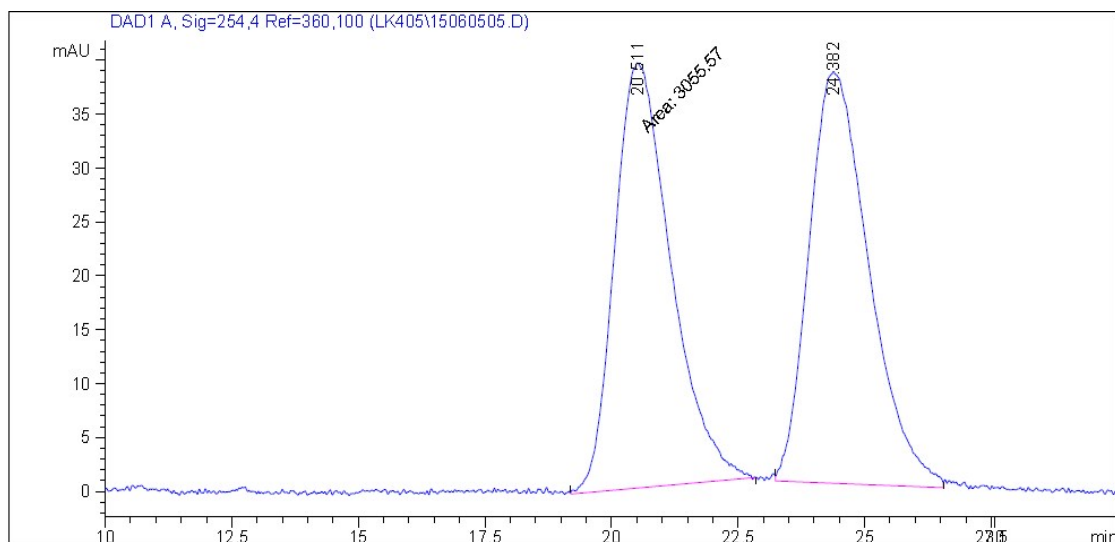

| Peak # | RetTime [min] | Type | Width [min] | Area [mAU*s] | Height [mAU] | Area %  |
|--------|---------------|------|-------------|--------------|--------------|---------|
| 1      | 20.511        | MM T | 1.2914      | 3055.57275   | 39.43618     | 49.2649 |
| 2      | 24.382        | VV   | 0.9730      | 3146.75830   | 38.20330     | 50.7351 |

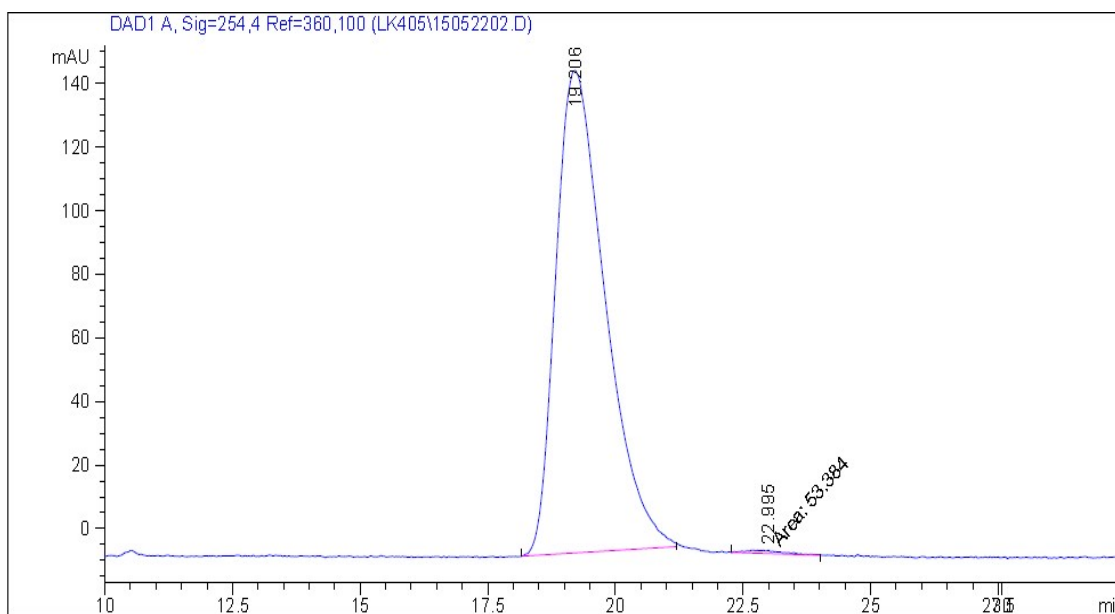

| Peak # | RetTime [min] | Type | Width [min] | Area [mAU*s] | Height [mAU] | Area %  |
|--------|---------------|------|-------------|--------------|--------------|---------|
| 1      | 19.206        | PB   | 0.8236      | 1.02075e4    | 151.58604    | 99.4797 |
| 2      | 22.995        | MM T | 0.8331      | 53.38404     | 1.06794      | 0.5203  |

**1-((2S,3S,5R)-5-hydroxy-3-(4-nitrophenyl)-1-tosylpyrrolidin-2-yl)-2,2-dimethylpropan-1-one (3cf)**

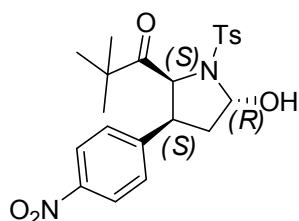

Chiral amine catalyst 2- {diphenyl[(trimethylsilyl)oxy]methyl}pyrrolidine (0.08mmol., 26mg, 20mol%) was dissolved in 2.0 mL of CH<sub>2</sub>Cl<sub>2</sub> and 4-bromobenzene carboxylic acid (0.08mmol, 16mg, 20mol%) was added in an ordinary vial equipped with a Teflon-coated stir bar . The resulting solution was stirred at room temperature for 20 minutes, then 4-nitrocinnamaldehyde (0.4mmol) and N-(3,3-dimethyl-2-oxidanylidene-butyl)-4-methyl-benzenesulfonamide(0.5mmol) was added. The vial was stirring continued at room temperature for 96 hours. The crude mixture was flushed through a short plug of silica. Solvent was removed in *vacuo*. After flash column chromatography (hexane/ethyl acetate =4/1) **3cf** was obtained as amorphous solid (144.0 mg, 81% yield, dr=15:1 and >99% ee). The dr was determined by <sup>1</sup>H NMR and the ee was determined by HPLC analysis on a Daicel Chiralcel OD-H column: hexane/*i*-PrOH 80:20, flow rate 0.80 mL/min, λ = 254.0 nm: τ<sub>major</sub> = 19.5 min, τ<sub>minor</sub> = 27.9 min. HRMS ESI ORBITRAP (+) m/z: calculated for C<sub>23</sub>H<sub>28</sub>N<sub>2</sub>O<sub>6</sub>S 446.1512, found 469.1403 [M+Na]<sup>+</sup>. <sup>1</sup>H NMR (400 MHz, CDCl<sub>3</sub>): 7.74 (d, *J* = 8.0 Hz, 2H), 7.41 (d, *J* = 8.4 Hz, 2H), 7.29 (d, *J* = 8.0 Hz, 2H), 6.95 (d, *J* = 8.8 Hz, 2H), 5.83-5.85 (m, 1H), 5.02 (d, *J* = 4.4 Hz, 1H), 4.23 (s, 1H), 3.24-3.29 (m, 1H), 2.44 (s, 3H), 2.31-2.37 (m, 1H), 2.17-2.31 (m, 1H), 1.04 (s, 9H). <sup>13</sup>C NMR (400 MHz, CDCl<sub>3</sub>): 215.9, 143.9, 140.8, 137.0, 132.3, 129.6, 128.5, 127.4, 85.1, 68.0, 48.7, 45.3, 43.7, 26.5, 21.6. Mp (°C): 166-167.

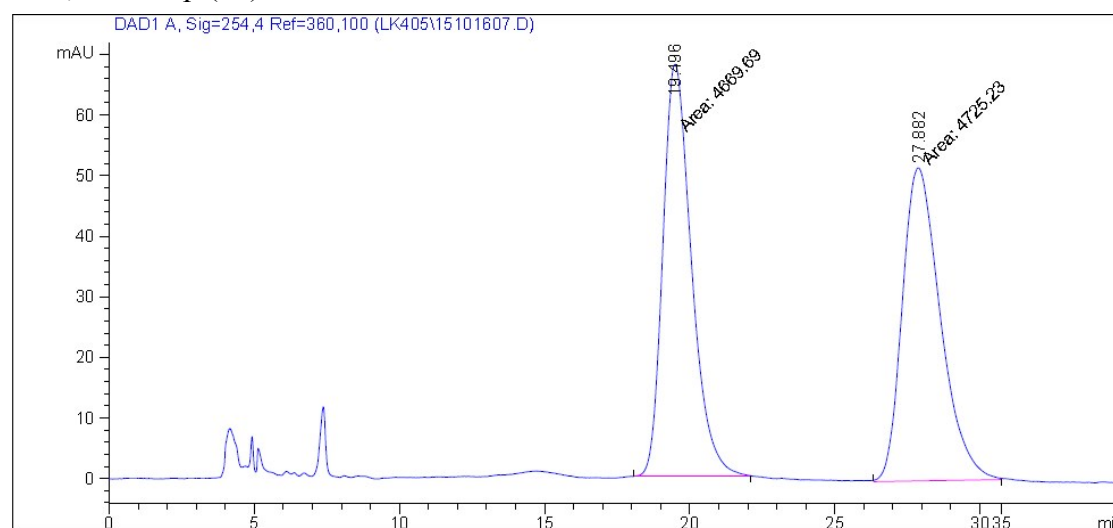

| Peak # | RetTime [min] | Type | Width [min] | Area [mAU*s] | Height [mAU] | Area %  |
|--------|---------------|------|-------------|--------------|--------------|---------|
| 1      | 19.496        | MM T | 1.1443      | 4669.69434   | 68.01344     | 49.7044 |
| 2      | 27.882        | MM T | 1.5246      | 4725.23486   | 51.65618     | 50.2956 |

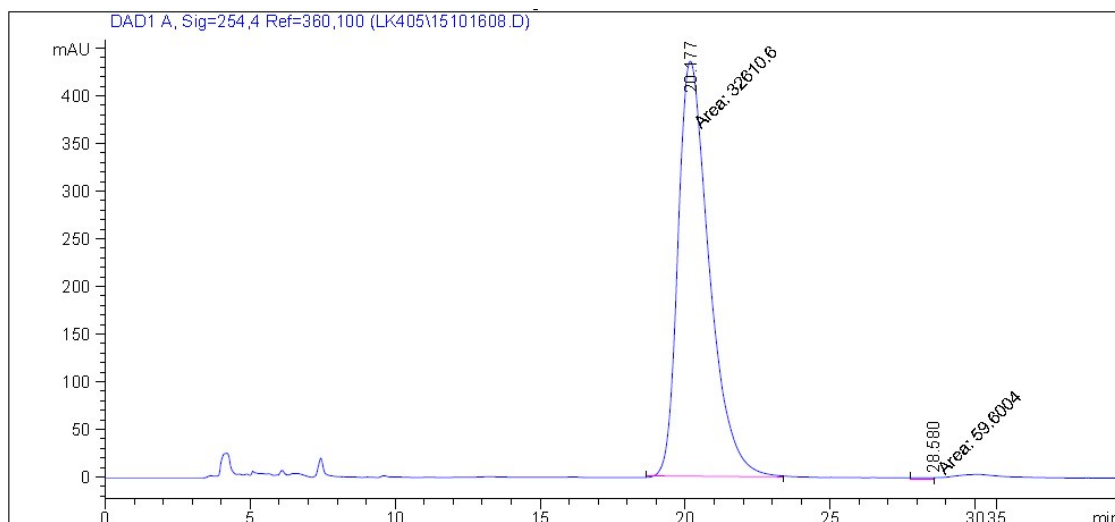

| Peak # | RetTime [min] | Type | Width [min] | Area [mAU*s] | Height [mAU] | Area %  |
|--------|---------------|------|-------------|--------------|--------------|---------|
| 1      | 20.177        | MM T | 1.2484      | 3.26106e4    | 435.36523    | 99.8176 |
| 2      | 28.580        | MM T | 0.7161      | 59.60035     | 1.38708      | 0.1824  |

**1-((2S,3S,5R)-3-(4-bromophenyl)-5-hydroxy-1-tosylpyrrolidin-2-yl)-2,2-dimethylpropan-1-one (3df)**

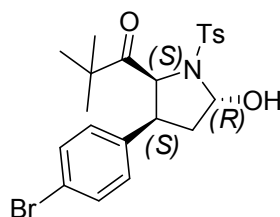

Chiral amine catalyst 2-{diphenyl[(trimethylsilyl)oxy]methyl}pyrrolidine (0.08mmol., 26mg, 20mol%) was dissolved in 2.0 mL of CH<sub>2</sub>Cl<sub>2</sub> and 4-bromobenzene carboxylic acid (0.08mmol., 16mg, 20mol%) was added in an ordinary vial equipped with a Teflon-coated stir bar. The resulting solution was stirred at room temperature for 20 minutes, then 4-bromocinnamaldehyde (0.4mmol) and N-(3,3-dimethyl-2-oxidanylidene-butyl)-4-methyl-benzenesulfonamide(0.5mmol) was added. The vial was stirring continued at room temperature for 96 hours. The crude mixture was flushed through a short plug of silica. Solvent was removed in *vacuo*. After flash column chromatography (hexane/ethyl acetate =4/1) **3df** was obtained as amorphous solid (121.7 mg, 64% yield, dr=6:1 and 98% ee). The dr was determined by <sup>1</sup>H NMR and the ee was determined by HPLC analysis on a Daicel Chiralcel OD-H column: hexane/*i*-PrOH 80:20, flow rate 0.80 mL/min, λ = 254.0 nm: τ<sub>major</sub> = 14.2 min, τ<sub>minor</sub> = 10.9 min. HRMS ESI ORBITRAP (+) m/z: calculated for C<sub>22</sub>H<sub>26</sub>BrNO<sub>4</sub>S 479.0766, found 502.0660 [M+Na]<sup>+</sup>. <sup>1</sup>H NMR (400 MHz, CDCl<sub>3</sub>): 8.17 (d, *J* = 8.8 Hz, 2H), 7.75 (d, *J* = 8.0 Hz, 2H), 7.30 (d, *J* = 8.0 Hz, 2H), 7.27 (d, *J* = 8.4 Hz, 2H), 5.88-5.93 (m, 1H), 5.08 (d, *J* = 3.6 Hz, 1H), 4.29 (d, *J* = 9.6 Hz, 1H), 3.39-3.43 (m, 1H), 2.45 (s, 3H), 2.38-2.42 (m, 1H), 2.25-2.32 (m, 1H), 1.04 (s, 9H). <sup>13</sup>C NMR (400 MHz, CDCl<sub>3</sub>): 215.3, 149.3, 147.3, 144.1, 136.9, 129.6, 127.8, 127.4, 124.4, 85.1, 67.6, 48.7, 45.1,

43.7, 26.4, 21.6. Mp (°C): 76-78.

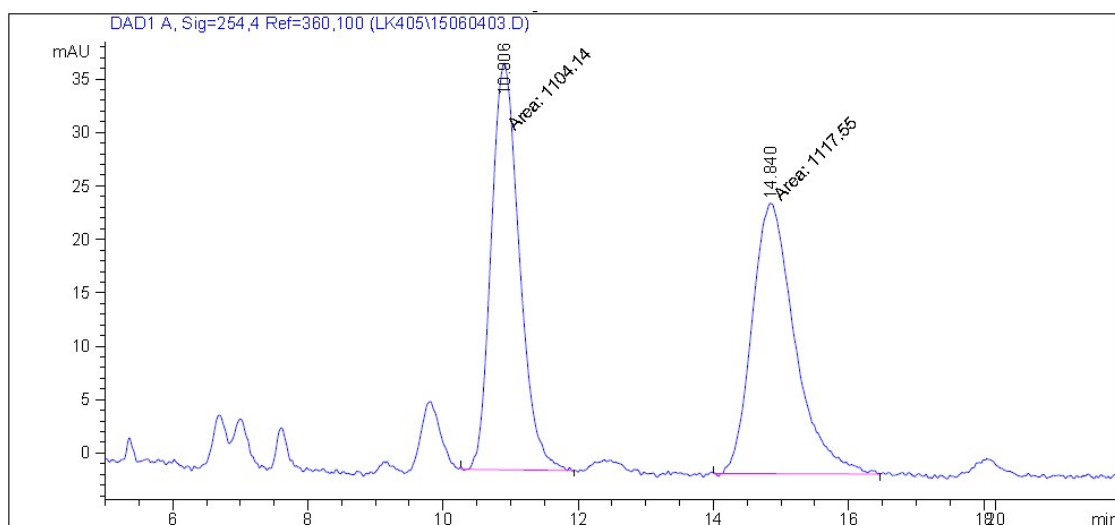

| Peak # | RetTime [min] | Type | Width [min] | Area [mAU*s] | Height [mAU] | Area %  |
|--------|---------------|------|-------------|--------------|--------------|---------|
| 1      | 10.906        | MM T | 0.5402      | 1104.14197   | 38.05540     | 49.6983 |
| 2      | 14.840        | MM T | 0.7359      | 1117.54614   | 25.30936     | 50.3017 |

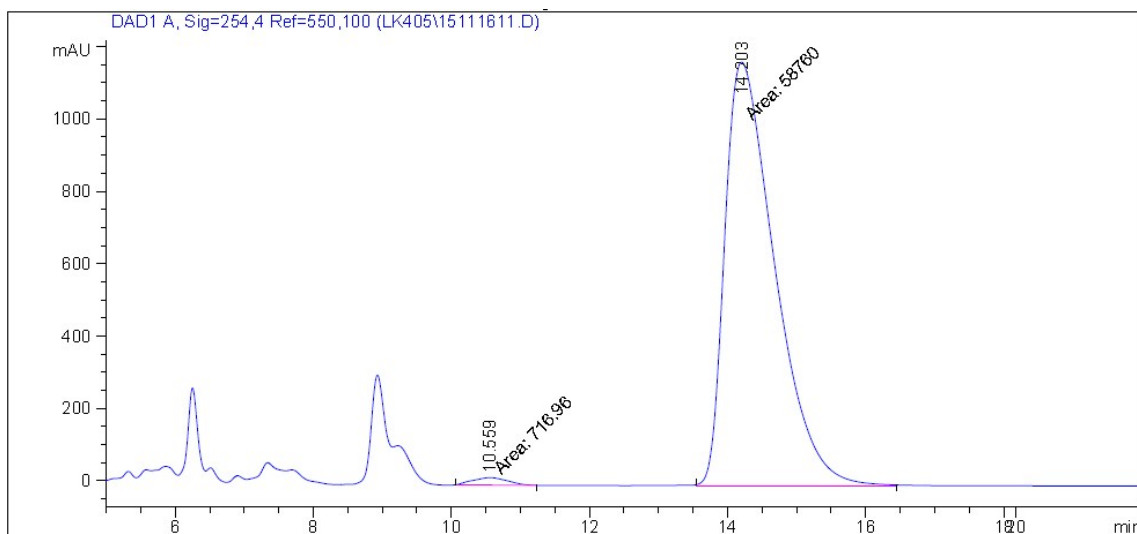

| Peak # | RetTime [min] | Type | Width [min] | Area [mAU*s] | Height [mAU] | Area %  |
|--------|---------------|------|-------------|--------------|--------------|---------|
| 1      | 10.559        | MM T | 0.5811      | 716.96033    | 20.56492     | 1.2054  |
| 2      | 14.203        | MM T | 0.8364      | 5.87600e4    | 1170.84949   | 98.7946 |



**1-((2S,3S,5R)-5-hydroxy-3-(3-nitrophenyl)-1-tosylpyrrolidin-2-yl)-2,2-dimethylpropan-1-one (3ef)**

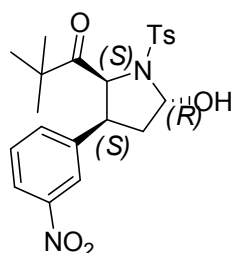

Chiral amine catalyst 2- $\{$ diphenyl $\}[($ trimethylsilyloxy $\})$ methyl $\}$ pyrrolidine (0.08mmol., 26mg, 20mol%) was dissolved in 2.0 mL of  $\text{CH}_2\text{Cl}_2$  and 4-bromobenzene carboxylic acid (0.08mmol., 16mg, 20mol%) was added in an ordinary vial equipped with a Teflon-coated stir bar . The resulting solution was stirred at room temperature for 20 minutes, then 3-nitrocinnamaldehyde (0.4mmol) and N-(3,3-dimethyl-2-oxidanylidene-butyl)-4-methyl-benzenesulfonamide(0.5mmol) was added. The vial was stirring continued at room temperature for 96 hours. The crude mixture was flushed through a short plug of silica. Solvent was removed in *vacuo*. After flash column chromatography (hexane/ethyl acetate =4/1) **3ef** was obtained as amorphous solid (149.7 mg, 84% yield, dr=4:1 and 97% ee). The dr was determined by  $^1\text{H}$  NMR and the ee was determined by HPLC analysis on a Daicel Chiralpak AD-H column: hexane/*i*-PrOH 80:20, flow rate 0.80 mL/min,  $\lambda = 254.0$  nm:  $\tau_{\text{major}} = 18.5$  min,  $\tau_{\text{minor}} = 27.4$  min. HRMS ESI ORBITRAP (+)  $m/z$ : calculated for  $\text{C}_{22}\text{H}_{26}\text{N}_2\text{O}_6\text{S}_6$  446.1512, found 469.1407  $[\text{M}+\text{Na}]^+$ .  $^1\text{H}$  NMR (400 MHz,  $\text{CDCl}_3$ ): 8.12-8.15 (m, 1H), 7.89 (s, 1H), 7.75 (d,  $J = 8.0$  Hz, 2H), 7.52-7.53 (m, 2H), 7.31 (d,  $J = 8.4$  Hz, 1H), 5.88 (d,  $J = 4.0$  Hz, 1H), 5.06 (d,  $J = 4.0$  Hz, 1H), 4.27 (s, 1H), 3.41-3.47 (m, 1H), 2.45 (s, 3H), 2.38-2.42 (m, 1H), 2.21-2.70 (m, 1H), 1.06 (s, 9H).  $^{13}\text{C}$  NMR (400 MHz,  $\text{CDCl}_3$ ): 215.3, 148.5, 144.2, 143.8, 136.7, 132.9, 130.4, 129.7, 127.3, 122.7, 121.8, 85.0, 67.7, 48.6, 45.0, 43.8, 26.5, 21.6. Mp ( $^\circ\text{C}$ ): 52-53.

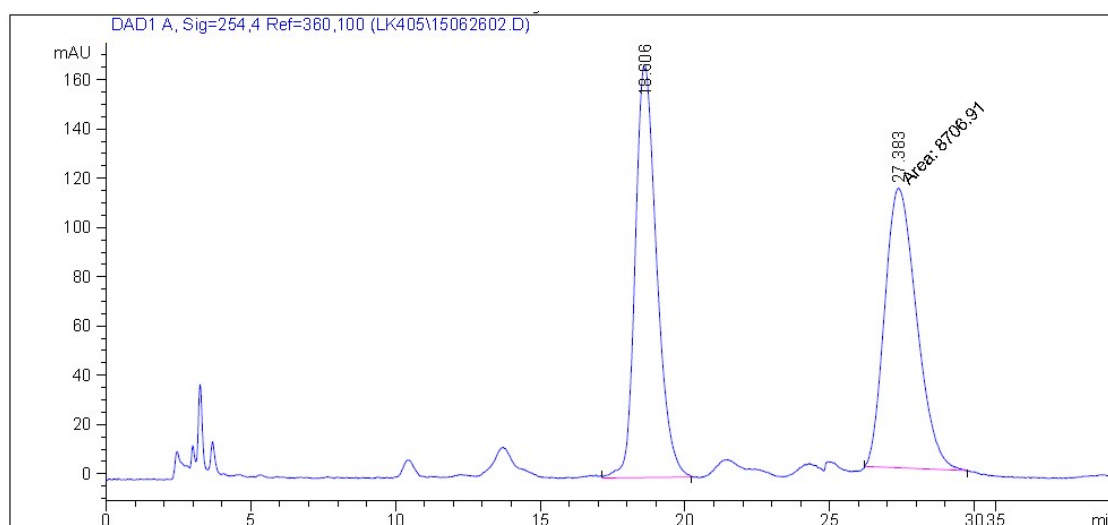

| Peak # | RetTime [min] | Type | Width [min] | Area [mAU*s] | Height [mAU] | Area %  |
|--------|---------------|------|-------------|--------------|--------------|---------|
| 1      | 18.606        | VB   | 0.7152      | 8646.22852   | 167.79413    | 49.8252 |
| 2      | 27.383        | MM T | 1.2775      | 8706.91016   | 113.58990    | 50.1748 |

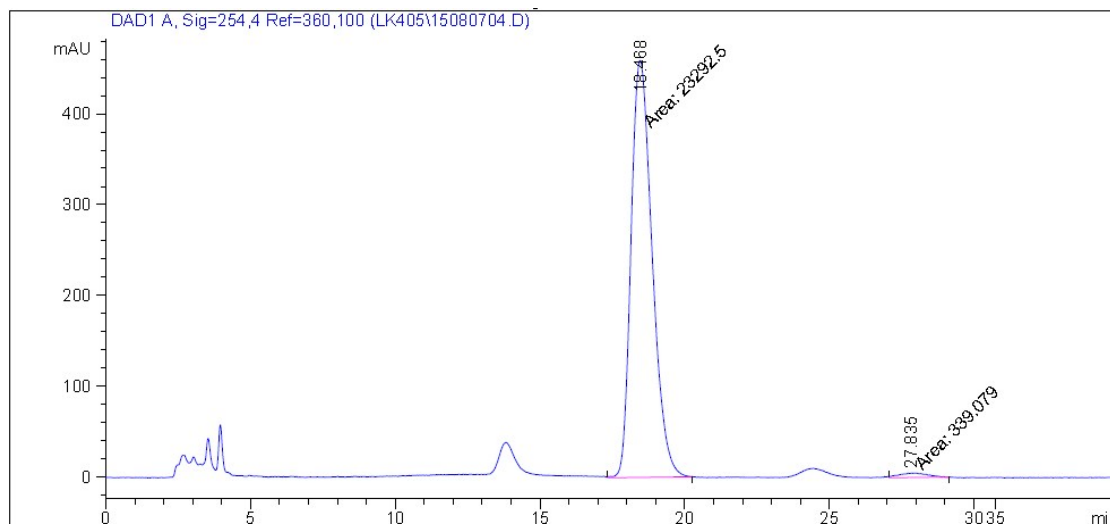

| Peak # | RetTime [min] | Type | Width [min] | Area [mAU*s] | Height [mAU] | Area %  |
|--------|---------------|------|-------------|--------------|--------------|---------|
| 1      | 18.468        | MM T | 0.8451      | 2.32925e4    | 459.38281    | 98.5651 |
| 2      | 27.835        | MM T | 1.1692      | 339.07944    | 4.83335      | 1.4349  |

**(2R,4S,5S)-4-(4-methoxyphenyl)-5-pivaloyl-1-tosylpyrrolidin-2-ferrocenyl-acetate (3ff)**

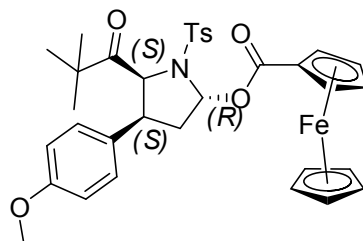

Chiral amine catalyst 2-{diphenyl[(trimethylsilyl)oxy]methyl}pyrrolidine (0.08mmol., 26mg, 20mol%) was dissolved in 2.0 mL of CH<sub>2</sub>Cl<sub>2</sub> and 4-bromobenzene carboxylic acid (0.08mmol., 16mg, 20mol%) was added in an ordinary vial equipped with a Teflon-coated stir bar. The resulting solution was stirred at room temperature for 20 minutes, then 4-methoxyphenylacrylaldehyde (0.4mmol) and N-(3,3-dimethyl-2-oxidanylidene-butyl)-4-methyl-benzenesulfonamide (0.5mmol) was added. The vial was stirring continued at room temperature for 96 hours. The crude mixture was flushed through a short plug of silica. Solvent was removed in *vacuo*. After flash column chromatography (hexane/ethyl acetate =4/1) **3ff** was obtained as amorphous solid (70.9 mg, 41% yield, dr=8:1 and 99% ee). The dr was determined by <sup>1</sup>H NMR and the ee was determined by HPLC analysis on a Daicel Chiralpak AD-H column: hexane/*i*-PrOH 80:20, flow rate 0.80 mL/min, λ = 254.0 nm: τ<sub>major</sub> = 10.4 min, τ<sub>minor</sub> = 17.2 min. HRMS ESI ORBITRAP (+) m/z: calculated for C<sub>34</sub>H<sub>37</sub>FeNO<sub>6</sub>S 643.1691,

found 666.1578 [M+Na]<sup>+</sup>. <sup>1</sup>H NMR (400 MHz, CDCl<sub>3</sub>): 7.80 (d, *J* = 8.3 Hz, 2H), 7.30 (d, *J* = 8.0 Hz, 2H), 7.08 (d, *J* = 8.7 Hz, 2H), 6.85 (d, *J* = 8.7 Hz, 2H), 6.72 (d, *J* = 3.9 Hz, 1H), 5.05 (d, *J* = 8.0 Hz, 1H), 4.88 (dt, *J* = 2.5, 1.3 Hz, 1H), 4.76 (dt, *J* = 2.5, 1.3 Hz, 1H), 4.44 – 4.37 (m, 2H), 4.22 (s, 5H), 3.80 (s, 3H), 3.43 (dt, *J* = 10.6, 7.3 Hz, 1H), 2.40 (s, 3H), 0.97 (s, 9H). <sup>13</sup>C NMR (400 MHz, CDCl<sub>3</sub>): 213.8, 170.8, 159.2, 143.9, 136.6, 129.6, 128.6, 127.6, 114.5, 84.7, 71.5, 70.7, 69.9, 68.1, 60.9, 56.3, 55.3, 48.9, 43.8, 43.0, 27.0, 21.6. Mp (°C): 112-113.

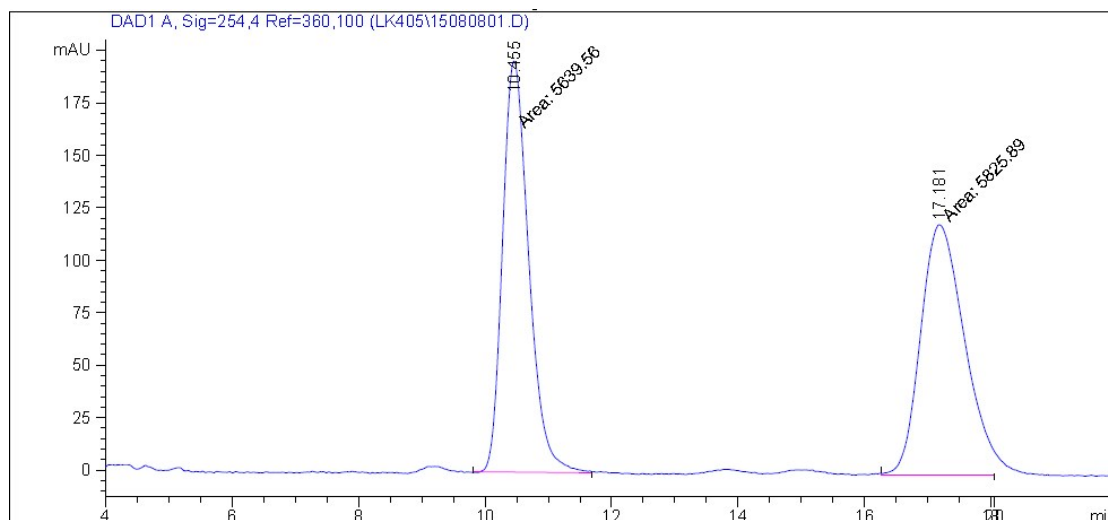

| Peak # | RetTime [min] | Type | Width [min] | Area [mAU*s] | Height [mAU] | Area %  |
|--------|---------------|------|-------------|--------------|--------------|---------|
| 1      | 10.455        | MM T | 0.4797      | 5639.56445   | 195.92567    | 49.1874 |
| 2      | 17.181        | MM T | 0.8465      | 5825.89258   | 119.30319    | 50.8126 |

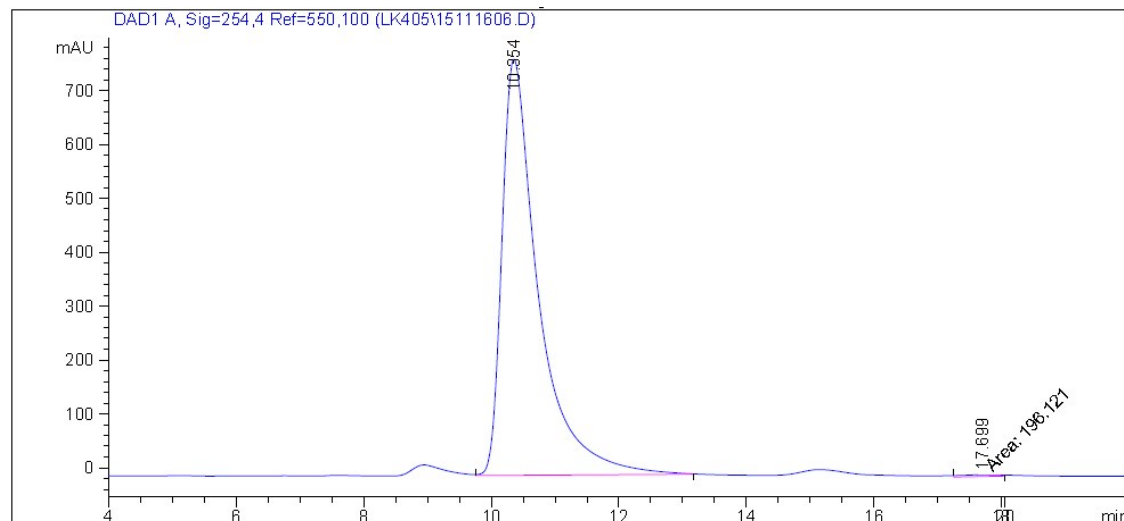

| Peak # | RetTime [min] | Type | Width [min] | Area [mAU*s] | Height [mAU] | Area %  |
|--------|---------------|------|-------------|--------------|--------------|---------|
| 1      | 10.354        | VB   | 0.5772      | 3.06417e4    | 771.74969    | 99.3640 |
| 2      | 17.699        | MM T | 0.8555      | 196.12123    | 3.82085      | 0.6360  |

**(2R,4S,5S)-4-(4-ethyl-3,5-dimethoxyphenyl)-5-pivaloyl-1-tosylpyrrolidin-2-ferrocenyl acetate (3gf)**

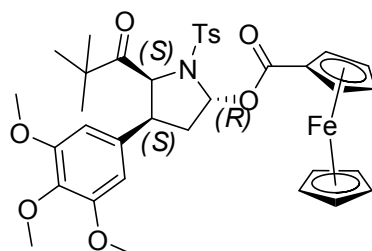

Chiral amine catalyst 2-{diphenyl[(trimethylsilyl)oxy]methyl}pyrrolidine (0.08mmol, 26mg, 20mol%) was dissolved in 2.0 mL of CH<sub>2</sub>Cl<sub>2</sub> and 4-bromobenzene carboxylic acid (0.08mmol, 16mg, 20mol%) was added in an ordinary vial equipped with a Teflon-coated stir bar. The resulting solution was stirred at room temperature for 20 minutes, then 3,4,5-trimethoxyphenylacrylaldehyde (0.4mmol) and N-(3,3-dimethyl-2-oxidanylidene-butyl)-4-methyl-benzenesulfonamide (0.5mmol) was added. The vial was stirring continued at room temperature for 96 hours. The crude mixture was flushed through a short plug of silica. Solvent was removed in *vacuo*. After flash column chromatography (hexane/ethyl acetate =4/1) **3gf** was obtained as amorphous solid (137.7 mg, 70% yield, dr=7:1 and 99% ee). The dr was determined by <sup>1</sup>H NMR and the ee was determined by HPLC analysis on a Daicel Chiralcel OD-H column: hexane/*i*-PrOH 80:20, flow rate 0.80 mL/min, λ = 254.0 nm: τ<sub>major</sub> = 15.7 min, τ<sub>minor</sub> = 35.2 min. HRMS ESI ORBITRAP (+) m/z: calculated for C<sub>36</sub>H<sub>41</sub>FeNO<sub>8</sub>S 703.1902, found 726.1791 [M+Na]<sup>+</sup>. <sup>1</sup>H NMR (400 MHz, CDCl<sub>3</sub>): 7.82 (d, J = 8.3 Hz, 2H), 7.30 (d, J = 8.0 Hz, 2H), 6.78 (d, J = 3.0 Hz, 1H), 6.41 (s, 2H), 5.13 (d, J = 7.1 Hz, 1H), 4.87 (s, 1H), 4.74 (s, 1H), 4.45 – 4.36 (m, 2H), 4.21 (s, 5H), 3.83 (s, 9H), 3.38 (d, J = 9.2 Hz, 1H), 2.39 (s, 3H), 1.01 (s, 9H). <sup>13</sup>C NMR (400 MHz, CDCl<sub>3</sub>): 213.42, 170.71, 153.64, 143.89, 136.65, 134.54, 129.46, 127.62, 104.29, 84.91, 69.88, 67.62, 60.89, 56.22, 49.52, 43.76, 26.76, 21.51. Mp (°C): 128-129.

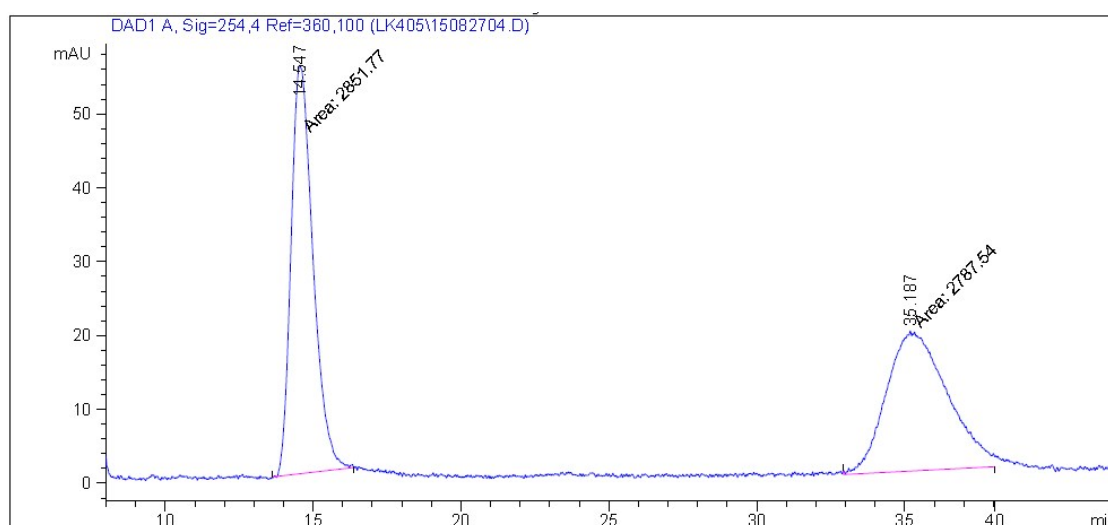

| Peak # | RetTime [min] | Type | Width [min] | Area [mAU*s] | Height [mAU] | Area %  |
|--------|---------------|------|-------------|--------------|--------------|---------|
| 1      | 14.547        | MM T | 0.8834      | 2851.77319   | 55.30195     | 50.5695 |
| 2      | 35.187        | MM T | 2.4380      | 2787.53882   | 19.05618     | 49.4305 |

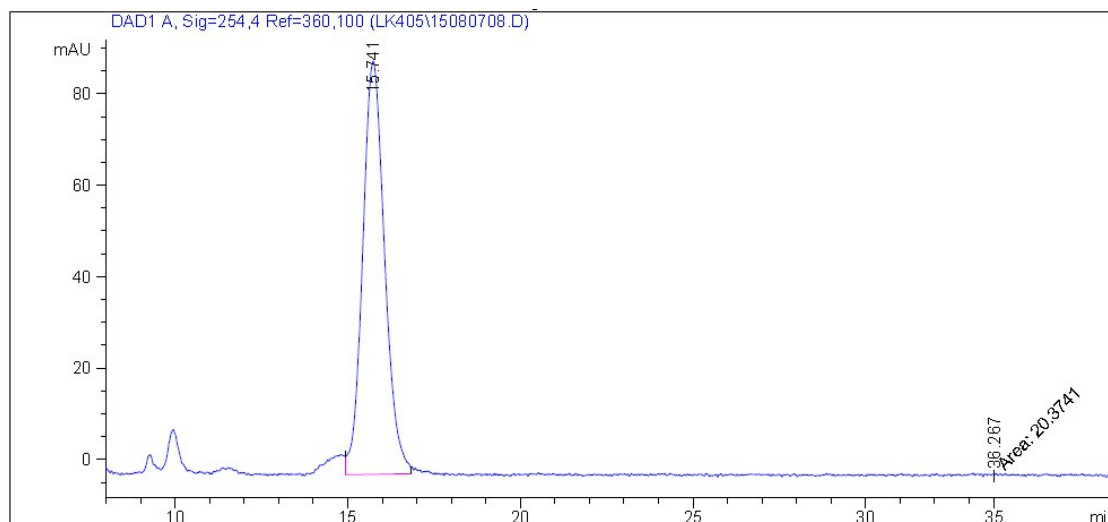

| Peak # | RetTime [min] | Type | Width [min] | Area [mAU*s] | Height [mAU] | Area %  |
|--------|---------------|------|-------------|--------------|--------------|---------|
| 1      | 15.741        | VV   | 0.5954      | 3993.48315   | 90.39220     | 99.4924 |
| 2      | 36.267        | MM T | 0.5607      | 20.37411     | 6.05576e-1   | 0.5076  |

**1-((2S,3S,5R)-3-(furan-2-yl)-5-hydroxy-1-tosylpyrrolidin-2-yl)-2,2-dimethylpropan-1-one (3hf)**

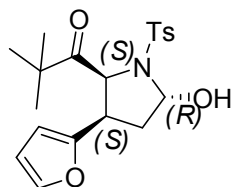

Chiral amine catalyst 2-{diphenyl[(trimethylsilyl)oxy]methyl}pyrrolidine (0.08mmol., 26mg, 20mol%) was dissolved in 2.0 mL of CH<sub>2</sub>Cl<sub>2</sub> and 4-bromobenzene carboxylic acid (0.08mmol., 16mg, 20mol%) was added in an ordinary vial equipped with a Teflon-coated stir bar. The resulting solution was stirred at room temperature for 20 minutes, then 2-furylcinnamaldehyde (0.4mmol) and N-(3,3-dimethyl-2-oxidanylidene-butyl)-4-methyl-benzenesulfonamide(0.5mmol) was added. The vial was stirring continued at room temperature for 96 hours. The crude mixture was flushed through a short plug of silica. Solvent was removed in *vacuo*. After flash column chromatography (hexane/ethyl acetate =4/1) **3hf** was obtained as amorphous solid (66.8 mg, 43% yield, dr=11:1 and 94% ee). The dr was determined by <sup>1</sup>H NMR and the ee was determined by HPLC analysis on a Daicel Chiralcel OD-H column: hexane/*i*-PrOH 80:20, flow rate 0.80 mL/min, λ = 254.0 nm: τ<sub>major</sub> = 10.2 min, τ<sub>minor</sub> = 11.3 min. HRMS ESI ORBITRAP (+) m/z: calculated for C<sub>20</sub>H<sub>25</sub>NO<sub>5</sub>S 391.1453, found 414.1348 [M+Na]<sup>+</sup>. <sup>1</sup>H NMR (400 MHz, CDCl<sub>3</sub>): 7.67 (d, J = 8.0 Hz, 2H),

7.24 (d,  $J = 7.2$  Hz, 3H), 6.21(m, 1H), 5.99 (d,  $J = 3.2$  Hz, 1H), 5.69-5.70 (m, 1H), 5.12 (d,  $J = 3.6$  Hz, 1H), 3.93 (s, 1H), 3.37-3.41 (m, 1H), 2.37-2.43 (m, 4H), 2.18-2.24 (m, 1H), 1.15 (s, 9H).  $^{13}\text{C}$  NMR (400 MHz,  $\text{CDCl}_3$ ): 153.0, 143.6, 142.1, 136.8, 129.5, 127.3, 110.4, 106.5, 84.7, 65.6, 44.0, 42.0, 40.3, 26.4, 21.5. Mp ( $^\circ\text{C}$ ): 55-56.

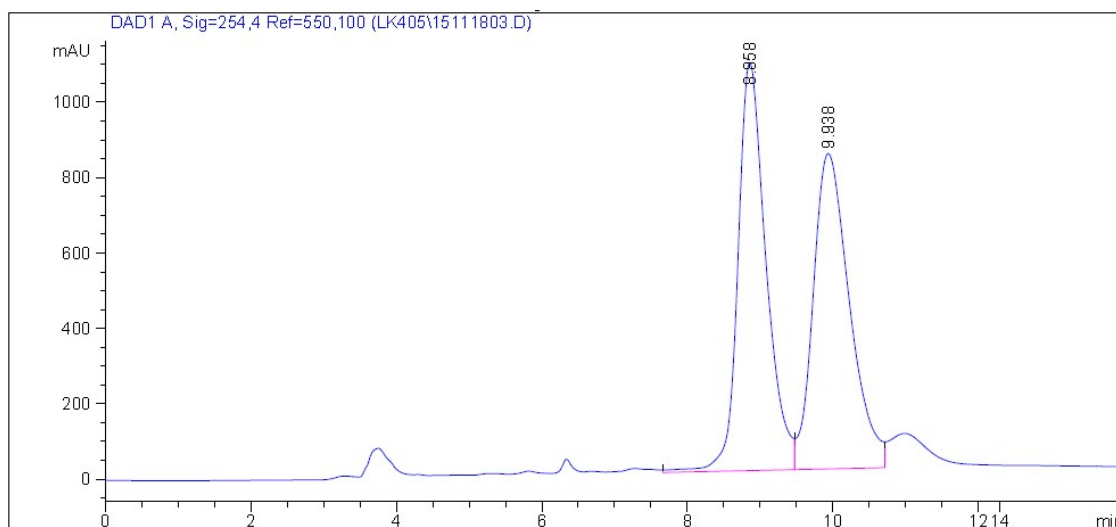

| Peak # | RetTime [min] | Type | Width [min] | Area [mAU*s] | Height [mAU] | Area %  |
|--------|---------------|------|-------------|--------------|--------------|---------|
| 1      | 8.858         | VV   | 0.4020      | 2.91397e4    | 1082.78638   | 50.0722 |
| 2      | 9.938         | VV   | 0.5330      | 2.90557e4    | 837.03534    | 49.9278 |

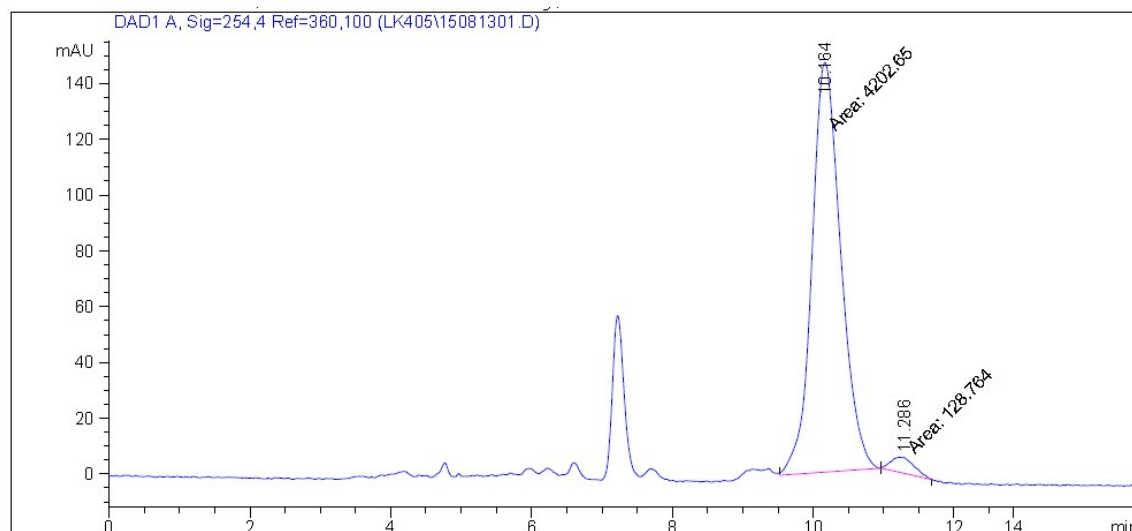

| Peak # | RetTime [min] | Type | Width [min] | Area [mAU*s] | Height [mAU] | Area %  |
|--------|---------------|------|-------------|--------------|--------------|---------|
| 1      | 10.164        | MM T | 0.4767      | 4202.64600   | 146.93231    | 97.0272 |
| 2      | 11.286        | MM T | 0.3770      | 128.76361    | 5.69188      | 2.9728  |

**1-((2S,3S,5R)-5-hydroxy-3-(naphthalen-1-yl)-1-tosylpyrrolidin-2-yl)-2,2-**

## dimethylpropan-1-one (**3if**)

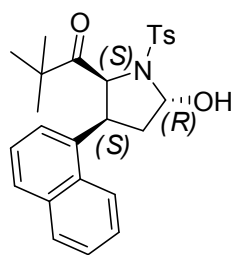

Chiral amine catalyst 2- {diphenyl[(trimethylsilyl)oxy]methyl}pyrrolidine (0.08mmol., 26mg, 20mol%) was dissolved in 2.0 mL of CH<sub>2</sub>Cl<sub>2</sub> and 4-bromobenzene carboxylic acid (0.08mmol., 16mg, 20mol%) was added in an ordinary vial equipped with a Teflon-coated stir bar . The resulting solution was stirred at room temperature for 20 minutes, then 1-naphthalenecinnamaldehyde (0.4mmol) and N-(3,3-dimethyl-2-oxidanylidene-butyl)-4-methyl-benzenesulfonamide (0.5mmol) was added. The vial was stirring continued at room temperature for 96 hours. The crude mixture was flushed through a short plug of silica. Solvent was removed in *vacuo*. After flash column chromatography (hexane/ethyl acetate =4/1) **3if** was obtained as amorphous solid (80.1 mg, 44% yield, dr=7:1 and 87% ee). The dr was determined by <sup>1</sup>H NMR and the ee was determined by HPLC analysis on a Daicel Chiralpak AD-H column: hexane/*i*-PrOH 80:20, flow rate 0.80 mL/min, λ = 254.0 nm: τ<sub>major</sub> = 7.9 min, τ<sub>minor</sub> = 14.4 min. HRMS ESI ORBITRAP (+) m/z: calculated for C<sub>26</sub>H<sub>29</sub>NO<sub>4</sub>S 451.1817, found 474.1934 [M+Na]<sup>+</sup>. <sup>1</sup>H NMR (400 MHz, CDCl<sub>3</sub>): 7.76-7.89 (m, 5H), 7.48-7.50 (m, 2H), 7.43 (d, *J* = 5.2 Hz, 2H), 7.34 (d, *J* = 8.0 Hz, 2H), 5.86 (s, 1H), 5.48 (d, *J* = 4.4 Hz, 1H), 4.38 (s, 1H), 4.01 (s, 1H), 2.50-2.56 (m, 1H), 2.46 (s, 3H), 2.33 (s, 1H), 0.94 (s, 9H). <sup>13</sup>C NMR (400 MHz, CDCl<sub>3</sub>): 216.6, 143.8, 137.3, 134.1, 130.8, 130.1, 129.6, 129.4, 128.20, 127.8, 127.6, 126.6, 125.9, 125.8, 122.3, 85.1, 67.0, 45.4, 43.7, 40.3, 26.9, 26.3, 21.6. Mp (°C): 160-162.

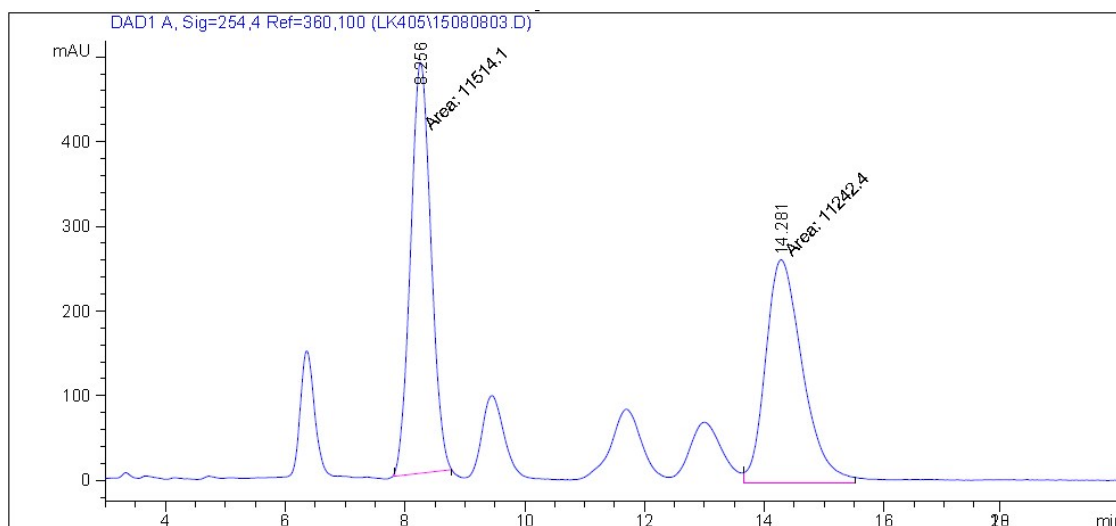

| Peak # | RetTime [min] | Type | Width [min] | Area [mAU*s] | Height [mAU] | Area %  |
|--------|---------------|------|-------------|--------------|--------------|---------|
| 1      | 8.256         | MM T | 0.3956      | 1.15141e4    | 485.13367    | 50.5971 |
| 2      | 14.281        | MM T | 0.7114      | 1.12424e4    | 263.38504    | 49.4029 |

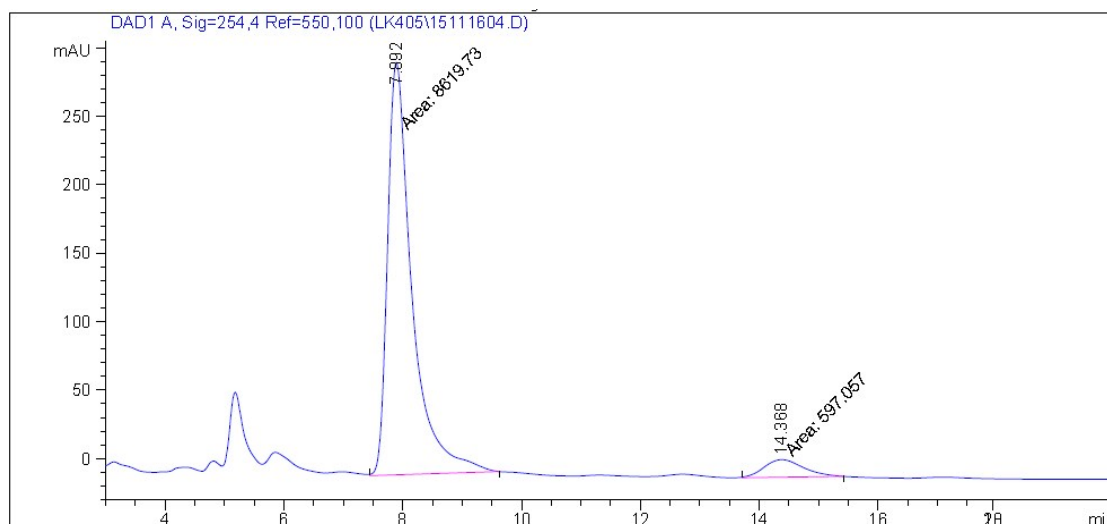

| Peak # | RetTime [min] | Type | Width [min] | Area [mAU*s] | Height [mAU] | Area %  |
|--------|---------------|------|-------------|--------------|--------------|---------|
| 1      | 7.892         | MM T | 0.4768      | 8619.72949   | 301.31021    | 93.5221 |
| 2      | 14.368        | MM T | 0.7691      | 597.05701    | 12.93785     | 6.4779  |

### 1-((2S,3S,5R)-3-(anthracen-9-yl)-5-hydroxy-1-tosylpyrrolidin-2-yl)ethanone (3ja)

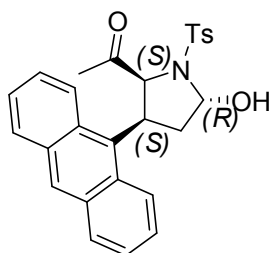

Chiral amine catalyst 2-{diphenyl[(trimethylsilyl)oxy]methyl}pyrrolidine (0.04mmol, 13mg, 10 mol%) was dissolved in 2.0 mL of CH<sub>2</sub>Cl<sub>2</sub> and benzoic acid (0.08mmol, 10mg, 20mol%) was added in an ordinary vial equipped with a Teflon-coated stir bar. The resulting solution was stirred at room temperature for 20 minutes, then 3-(anthracen-9-yl)acrylaldehyde (0.4mmol) and 4-methyl-N-(2-oxopropyl)benzenesulfonamide (0.5mmol) was added. The vial was stirring continued at room temperature for 96 hours. The crude mixture was flushed through a short plug of silica. Solvent was removed in *vacuo*. After flash column chromatography (hexane/ethyl acetate =6/1) **3ja** was obtained as amorphous solid (175.9mg, 96% yield, dr=25:1 and >99% ee). The dr was determined by <sup>1</sup>H NMR and the ee was determined by HPLC analysis on a Daicel Chiralpak AD-H column: hexane/*i*-PrOH 80:20, flow rate 0.60 mL/min, λ = 254.0 nm: τ<sub>major</sub> = 12.2min, τ<sub>minor</sub> = 18.1 min. HRMS ESI ORBITRAP (+) m/z: calculated for C<sub>27</sub>H<sub>25</sub>NO<sub>4</sub>S 459.1504, found 482.1387 [M+Na]<sup>+</sup>. <sup>1</sup>H NMR (400 MHz, CDCl<sub>3</sub>): 8.42 (s, 1H), 8.01 (d, *J* = 8.4 Hz, 2H), 7.91 (d, *J* = 8.4 Hz, 2H), 7.73 (s, 1H), 7.26-7.48 (m, 7H), 5.95 (d, *J* = 8.4 Hz, 1H), 5.12 (m, 1H), 5.07 (d, *J* = 8.4 Hz, 1H), 3.68 (s, 1H), 2.79-2.87 (m, 1H), 2.57 (s, 3H), 2.39 (dd, *J* = 13.6, 8.4 Hz, 1H), 2.21 (s, 3H). <sup>13</sup>C NMR (400 MHz, CDCl<sub>3</sub>): 207.9, 144.4, 136.4, 131.8, 130.3, 130.2, 129.9, 128.9, 128.7, 127.4, 126.5, 124.8, 123.0, 85.1, 72.4, 41.5, 40.7, 26.3, 21.7. Mp. (°C):



183-184.

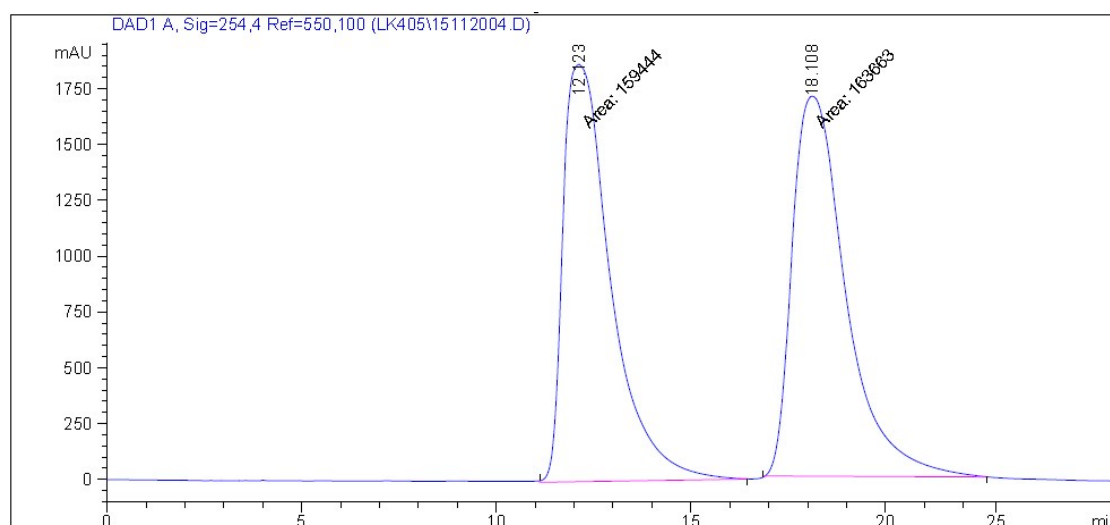

| Peak # | RetTime [min] | Type | Width [min] | Area [mAU*s] | Height [mAU] | Area %  |
|--------|---------------|------|-------------|--------------|--------------|---------|
| 1      | 12.123        | MM T | 1.4212      | 1.59444e5    | 1869.81970   | 49.3471 |
| 2      | 18.108        | MM T | 1.6023      | 1.63663e5    | 1702.41016   | 50.6529 |

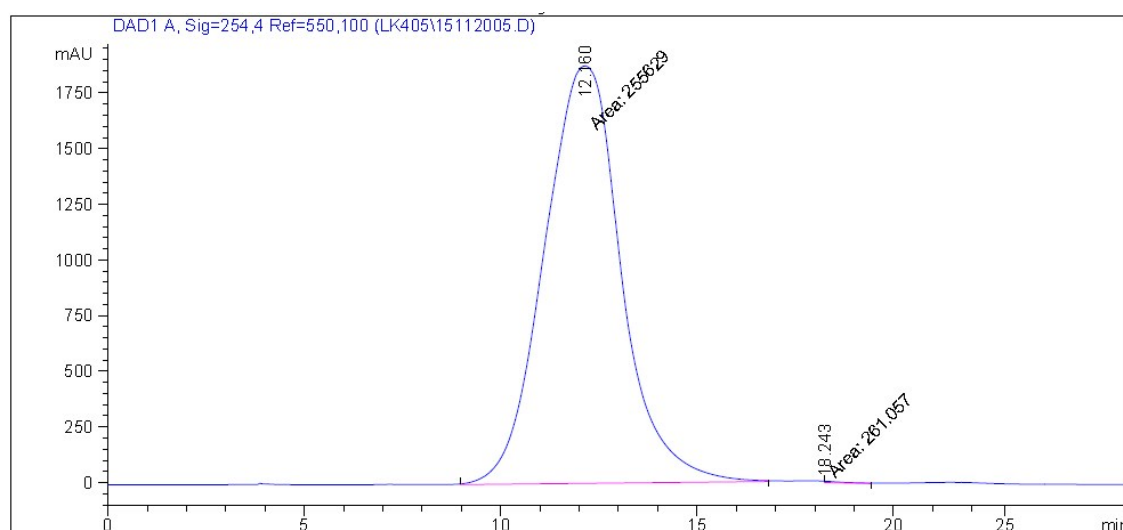

| Peak # | RetTime [min] | Type | Width [min] | Area [mAU*s] | Height [mAU] | Area %  |
|--------|---------------|------|-------------|--------------|--------------|---------|
| 1      | 12.160        | MM T | 2.2712      | 2.55629e5    | 1875.87402   | 99.8980 |
| 2      | 18.243        | MM T | 0.4744      | 261.05725    | 6.53707      | 0.1020  |

**1-((2S,3S,5R)-3-(anthracen-9-yl)-5-hydroxy-1-tosylpyrrolidin-2-yl)propan-1-one (3jd)**

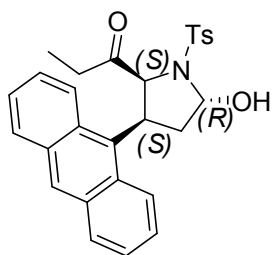

Chiral amine catalyst 2-{diphenyl[(trimethylsilyl)oxy]methyl}pyrrolidine (0.04mmol, 13mg, 10mol%) was dissolved in 2.0 mL of CH<sub>2</sub>Cl<sub>2</sub> and benzoic acid (0.08mmol, 10mg, 20mol%) was added in an ordinary vial equipped with a Teflon-coated stir bar . The resulting solution was stirred at room temperature for 20 minutes, then 3-(anthracen-9-yl)acrylaldehyde (0.4mmol) and 4-methyl-N-(2-oxobutyl)benzenesulfonamide (0.5mmol) was added. The vial was stirring continued at room temperature for 96 hours. The crude mixture was flushed through a short plug of silica. Solvent was removed in *vacuo*. After flash column chromatography (hexane/ethyl acetate =6/1) **3jd** was obtained as amorphous solid 181.1mg, (96% yield, dr=10:1 and 97% ee). The dr was determined by <sup>1</sup>H NMR and the ee was determined by HPLC analysis on a Daicel Chiralpak AD-H column: hexane/*i*-PrOH 80:20, flow rate 0.60 mL/min, λ = 254.0 nm: τ<sub>major</sub> = 11.0 min, τ<sub>minor</sub> = 21.3 min. HRMS ESI ORBITRAP (+) m/z: calculated for C<sub>28</sub>H<sub>27</sub>NO<sub>4</sub>S 473.1661, found 496.1546 [M+Na]<sup>+</sup>. <sup>1</sup>H NMR (400 MHz, CDCl<sub>3</sub>): 8.43 (s, 1H), 8.03 (d, *J* = 8.5 Hz, 2H), 7.90 (d, *J* = 7.9 Hz, 2H), 7.73 (d, *J* = 7.8 Hz, 1H), 7.44 (t, *J* = 7.3 Hz, 4H), 7.30 (d, *J* = 7.7 Hz, 3H), 5.95 (d, *J* = 4.5 Hz, 1H), 5.16 (d, *J* = 8.2 Hz, 1H), 5.12 – 5.00 (m, 1H), 3.84 (d, *J* = 4.5 Hz, 1H), 2.90 – 2.78 (m, 1H), 2.56 (s, 3H), 2.38 (dd, *J* = 13.0, 7.9 Hz, 2H), 2.26 (dd, *J* = 18.6, 7.4 Hz, 1H), 0.92 (t, *J* = 7.2 Hz, 3H). <sup>13</sup>C NMR (400 MHz, CDCl<sub>3</sub>): 210.77, 144.46, 143.66, 137.51, 136.12, 131.74, 129.94, 129.72, 129.03, 128.35, 127.54, 127.36, 124.98, 71.52, 70.34, 42.40, 41.07, 34.48 , 21.73, 7.12. Mp (°C): 163-164.

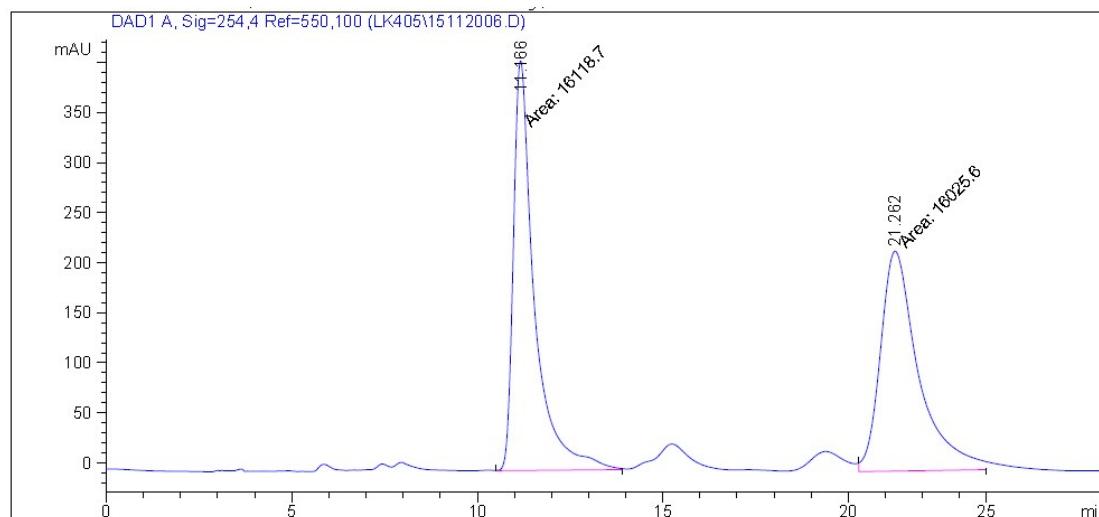

| Peak # | RetTime [min] | Type | Width [min] | Area [mAU*s] | Height [mAU] | Area %  |
|--------|---------------|------|-------------|--------------|--------------|---------|
| 1      | 11.166        | MM T | 0.6563      | 1.61187e4    | 409.35056    | 50.1448 |
| 2      | 21.262        | MM T | 1.2142      | 1.60256e4    | 219.96652    | 49.8552 |

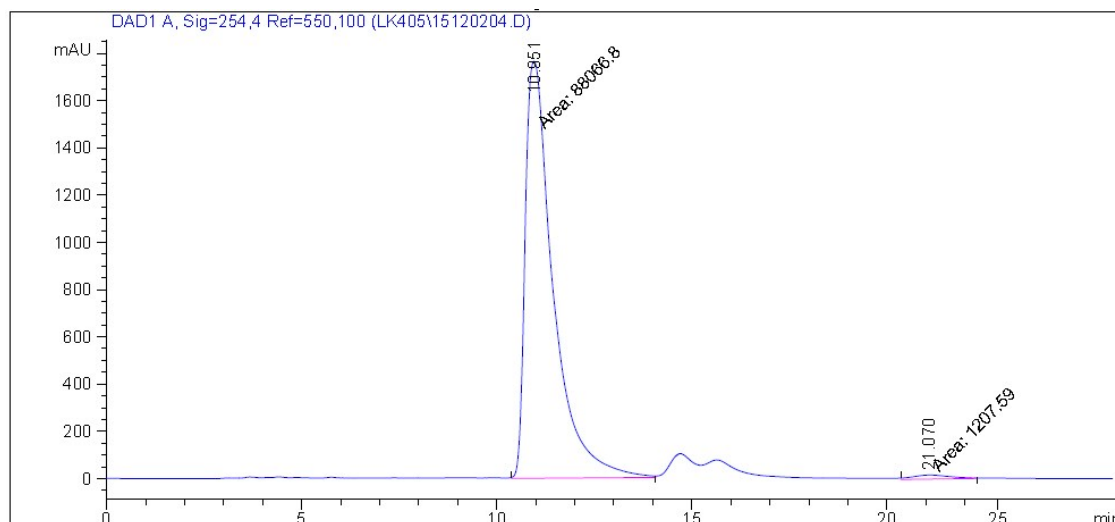

| Peak # | RetTime [min] | Type | Width [min] | Area [mAU*s] | Height [mAU] | Area %  |
|--------|---------------|------|-------------|--------------|--------------|---------|
| 1      | 10.951        | MM T | 0.8313      | 8.80668e4    | 1765.66785   | 98.6473 |
| 2      | 21.070        | MM T | 1.1365      | 1207.59265   | 17.70903     | 1.3527  |

**1-((2S,3S,5R)-3-(anthracen-9-yl)-5-hydroxy-1-tosylpyrrolidin-2-yl)-2-methylpropan-1-one (3je)**

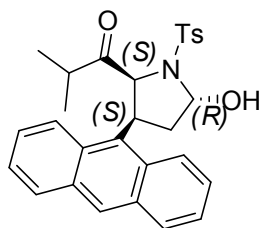

Chiral amine catalyst 2-{diphenyl[(trimethylsilyl)oxy]methyl}pyrrolidine (0.04mmol., 13mg, 10mol%) was dissolved in 2.0 mL of  $\text{CH}_2\text{Cl}_2$  and benzoic acid (0.08mmol., 10mg, 20mol%) was added in an ordinary vial equipped with a Teflon-coated stir bar. The resulting solution was stirred at room temperature for 20 minutes, then 3-(anthracen-9-yl)acrylaldehyde (0.4mmol) and 4-methyl-N-(3-methyl-2-oxobutyl)-benzenesulfonamide (0.5mmol) was added. The vial was stirring continued at room temperature for 96 hours. The crude mixture was flushed through a short plug of silica. Solvent was removed in *vacuo*. After flash column chromatography (hexane/ethyl acetate =6/1) **3je** was obtained as amorphous solid (178.9mg, 92% yield, dr=13:1 and 96% ee). The dr was determined by  $^1\text{H}$  NMR and the ee was determined by HPLC analysis on a Daicel Chiralpak AD-H column: hexane/*i*-PrOH 80:20, flow rate 0.60 mL/min,  $\lambda = 254.0$  nm:  $\tau_{\text{major}} = 11.7$  min,  $\tau_{\text{minor}} = 31.2$  min. HRMS ESI ORBITRAP (+) m/z: calculated for  $\text{C}_{28}\text{H}_{27}\text{NO}_4\text{S}$  487.1817, found 510.1703  $[\text{M}+\text{Na}]^+$ .  $^1\text{H}$  NMR (400 MHz,  $\text{CDCl}_3$ ): 8.44 (s, 1H), 8.04 (d,  $J = 8.4$  Hz, 3H), 7.88 (d,  $J = 8.4$  Hz, 3H), 7.40-7.49 (m, 6H), 6.00 (dd,  $J = 6.4, 4.8$  Hz, 1H), 5.43 (d,  $J = 7.6$  Hz, 1H), 4.96-5.03 (m, 1H), 4.18 (d,  $J = 6.8$  Hz, 1H), 2.83-2.91 (m, 1H), 2.52 (s, 3H), 2.43 (dd,  $J = 13.2, 8.4$  Hz, 1H), 2.22-2.29 (m, 1H), 0.88 (d,  $J = 6.8$  Hz, 3H), 0.64 (d,  $J = 6.8$  Hz, 3H).  $^{13}\text{C}$  NMR (400 MHz,  $\text{CDCl}_3$ ): 215.4, 144.1, 137.3, 131.8, 129.9, 129.8, 128.8, 127.4,

127.2, 126.6, 125.0, 123.6, 84.9, 70.1, 43.1, 42.1, 39.6, 21.7, 18.1, 16.8. Mp (°C):  
148-149.

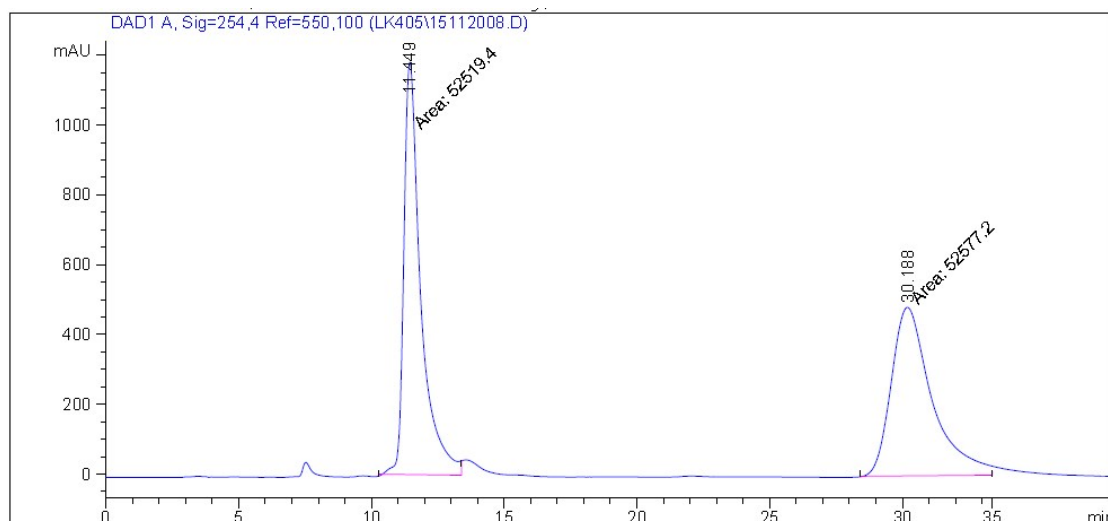

| Peak # | RetTime [min] | Type | Width [min] | Area [mAU*s] | Height [mAU] | Area %  |
|--------|---------------|------|-------------|--------------|--------------|---------|
| 1      | 11.449        | MM T | 0.7412      | 5.25194e4    | 1180.91882   | 49.9725 |
| 2      | 30.188        | MM T | 1.8139      | 5.25772e4    | 483.08755    | 50.0275 |

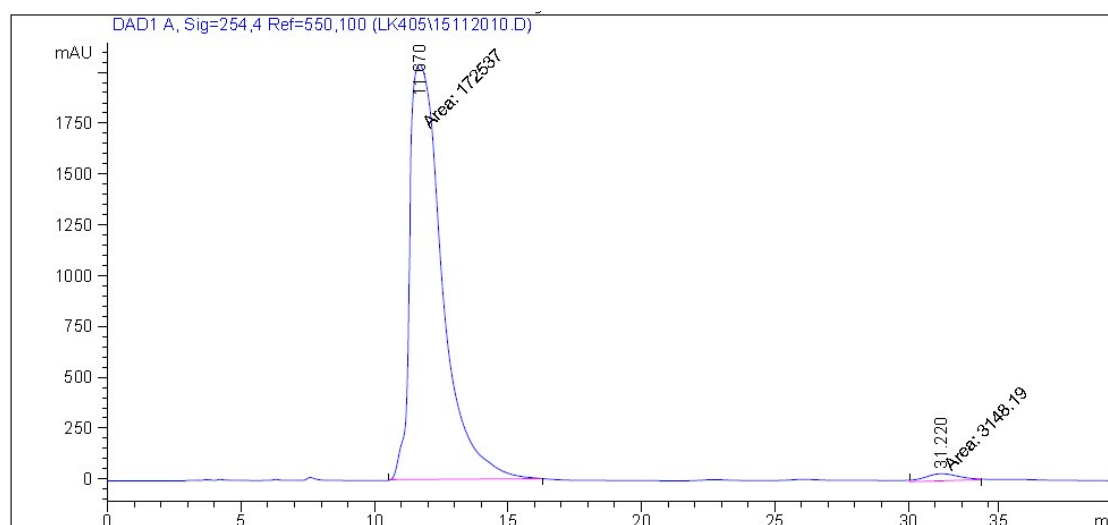

| Peak # | RetTime [min] | Type | Width [min] | Area [mAU*s] | Height [mAU] | Area %  |
|--------|---------------|------|-------------|--------------|--------------|---------|
| 1      | 11.670        | MM T | 1.4086      | 1.72537e5    | 2041.40356   | 98.2081 |
| 2      | 31.220        | MM T | 1.4775      | 3148.18896   | 35.51200     | 1.7919  |

**(2S,4S,5R)-5-acetyl-4-(4-nitrophenyl)-1-tosylpyrrolidin-2-ferrocenyl acetate (3ca)**  
**and (2R,4S,5S)-5-acetyl-4-(4-nitrophenyl)-1-tosylpyrrolidin-2-ferrocenyl acetate (3ca')**

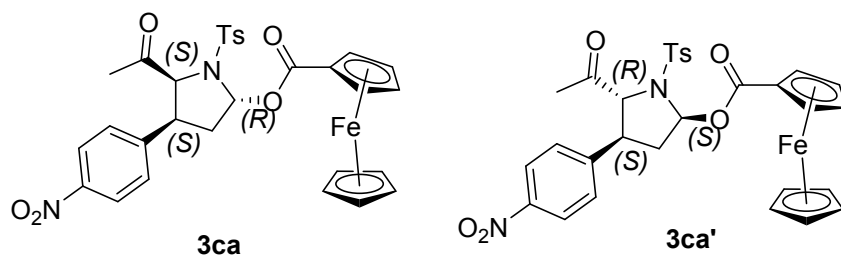

Chiral amine catalyst 2- $\{diphenyl[(trimethylsilyl)oxy]methyl\}$ pyrrolidine (0.04mmol., 13 mg, 10 mol%) was dissolved in 2.0 mL of  $CH_2Cl_2$  and benzoic acid (0.08mmol., 10 mg, 20 mol%) was added in an ordinary vial equipped with a Teflon-coated stir bar. The resulting solution was stirred at room temperature for 20 minutes, then 4-nitrocinnamaldehyde (0.4mmol) and 4-methyl-N-(2-oxopropyl)benzene-sulfonamide (0.5mmol) was added. The vial was stirring continued at room temperature for 96 hours. The crude mixture was flushed through a short plug of silica. Solvent was removed in *vacuo*. After flash column chromatography (hexane/ethyl acetate =4/1) reaction product was obtained as amorphous solid (158.7mg, 98% yield, dr=10:7, **3ca** >99% ee (Fc ester), **3ca'** >99% ee (Fc ester)). The dr was determined by  $^1H$  NMR and the ee of **3ca** was determined by HPLC analysis on a Daicel Chiralpak AD-H column: hexane/*i*-PrOH 70:30, flow rate 0.80 mL/min,  $\lambda = 254.0$  nm:  $\tau_{major} = 23.0$  min,  $\tau_{minor} = 52.0$  min. HRMS ESI ORBITRAP (+) m/z: calculated for  $C_{30}H_{28}FeN_2O_7S$  616.0967, found 639.0851  $[M+Na]^+$ .  $^1H$  NMR (400 MHz,  $CDCl_3$ ): 8.19 (d,  $J = 8.4$  Hz, 2H), 7.83 (d,  $J = 8.2$  Hz, 2H), 7.36 (dd,  $J = 14.9, 8.4$  Hz, 4H), 6.81 (d,  $J = 4.6$  Hz, 1H), 4.87 – 4.75 (m, 2H), 4.63 (s, 1H), 4.44 (d,  $J = 9.8$  Hz, 2H), 4.25 (s, 5H), 4.20 – 4.06 (m, 1H), 2.96 – 2.85 (m, 1H), 2.46 (s, 3H), 2.26 (dd,  $J = 13.1, 5.6$  Hz, 1H), 1.68 (s, 3H).  $^{13}C$  NMR (400 MHz,  $CDCl_3$ ): 205.45, 170.74, 147.68, 144.44, 141.91, 136.25, 129.76, 127.99, 124.03, 84.01, 77.39, 76.75, 71.60, 70.36, 70.07, 69.98, 69.24, 44.69, 36.15, 29.70, 21.67. mp ( $^{\circ}C$ ): 133-134.

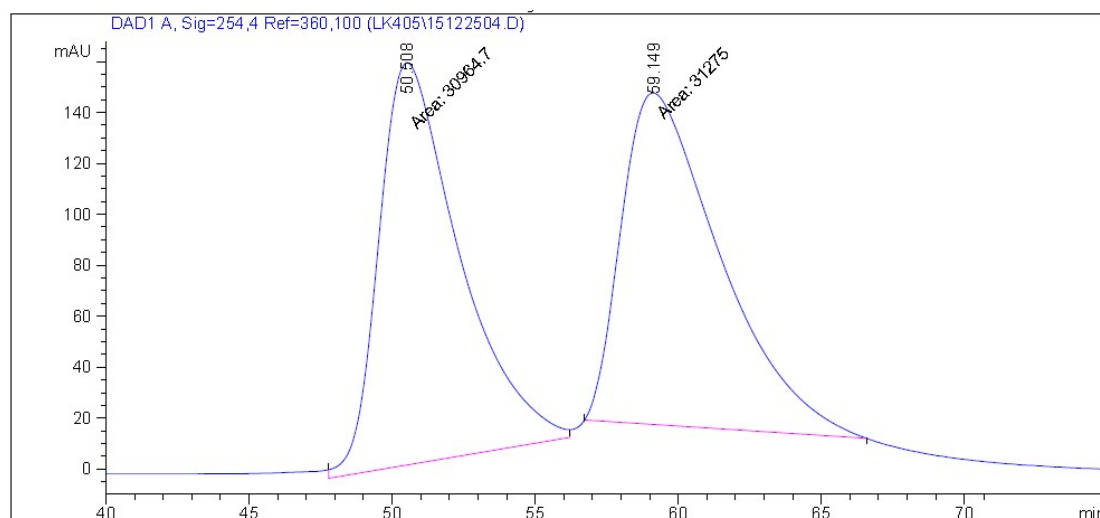

| Peak # | RetTime [min] | Type | Width [min] | Area [mAU*s] | Height [mAU] | Area %  |
|--------|---------------|------|-------------|--------------|--------------|---------|
| 1      | 50.508        | MM T | 3.2665      | 3.09647e4    | 157.98924    | 49.7508 |
| 2      | 59.149        | MM T | 4.0043      | 3.12750e4    | 130.17268    | 50.2492 |

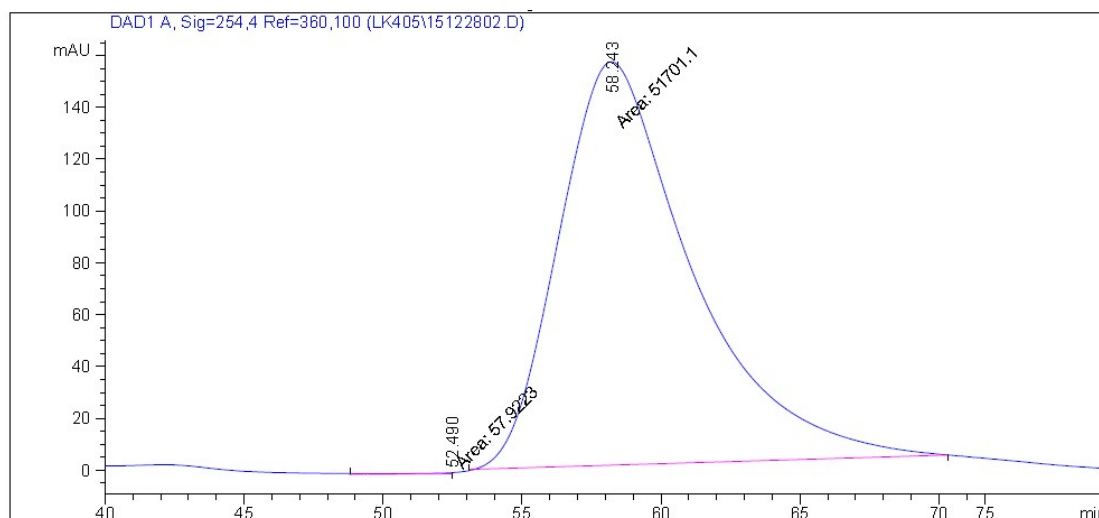

| Peak # | RetTime [min] | Type | Width [min] | Area [mAU*s] | Height [mAU] | Area %  |
|--------|---------------|------|-------------|--------------|--------------|---------|
| 1      | 52.490        | MM T | 1.9250      | 57.92232     | 5.01500e-1   | 0.1119  |
| 2      | 58.243        | MM T | 5.5352      | 5.17011e4    | 155.67300    | 99.8881 |

The ee of **3ca'** was determined by HPLC analysis on a Daicel Chiralpak AD-H column: hexane/*i*-PrOH 70:30, flow rate 0.80 mL/min,  $\lambda = 254.0$  nm;  $\tau_{major} = 58.2$  min,  $\tau_{minor} = 52.5$  min. HRMS ESI ORBITRAP (+)  $m/z$ : calculated for  $C_{30}H_{28}FeN_2O_7S$  616.0967, found 639.0851 [M+Na]<sup>+</sup>. <sup>1</sup>H NMR (400 MHz, CDCl<sub>3</sub>): 8.10 (d,  $J = 8.7$  Hz, 2H), 7.84 – 7.76 (m, 2H), 7.38 (d,  $J = 8.1$  Hz, 2H), 7.15 (d,  $J = 8.7$  Hz, 2H), 6.74 (d,  $J = 5.0$  Hz, 1H), 4.82 (d,  $J = 31.8$  Hz, 2H), 4.47 (d,  $J = 7.7$  Hz, 2H), 4.31 (s, 5H), 4.10 – 4.02 (m, 1H), 3.77 – 3.66 (m, 1H), 2.54 (s, 3H), 2.47 (s, 3H), 2.34 (dd,  $J = 13.5, 6.5$  Hz, 1H), 2.01 – 1.91 (m, 1H). <sup>13</sup>C NMR (400 MHz, CDCl<sub>3</sub>): 205.98, 170.40, 147.40, 145.07, 134.52, 130.31, 128.31, 127.49, 124.16, 84.59, 74.10, 72.01, 71.84, 70.50, 70.15, 69.94, 45.71, 40.76, 29.69, 25.34, 21.69. Mp (°C): 176–177.

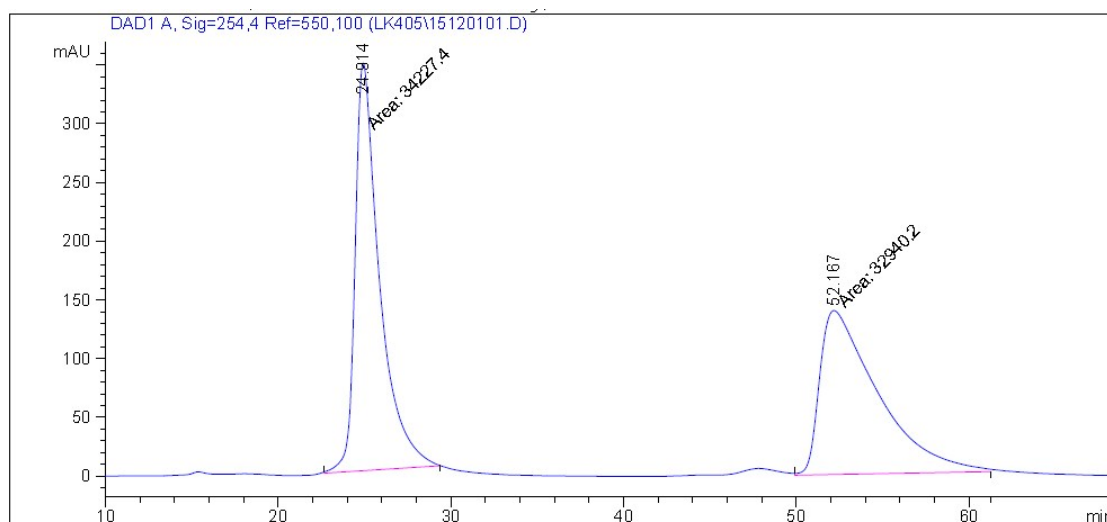

| Peak # | RetTime [min] | Type | Width [min] | Area [mAU*s] | Height [mAU] | Area %  |
|--------|---------------|------|-------------|--------------|--------------|---------|
| 1      | 24.914        | MM T | 1.6431      | 3.42274e4    | 347.18488    | 50.9582 |
| 2      | 52.167        | MM T | 3.4728      | 3.29402e4    | 139.72362    | 49.0418 |

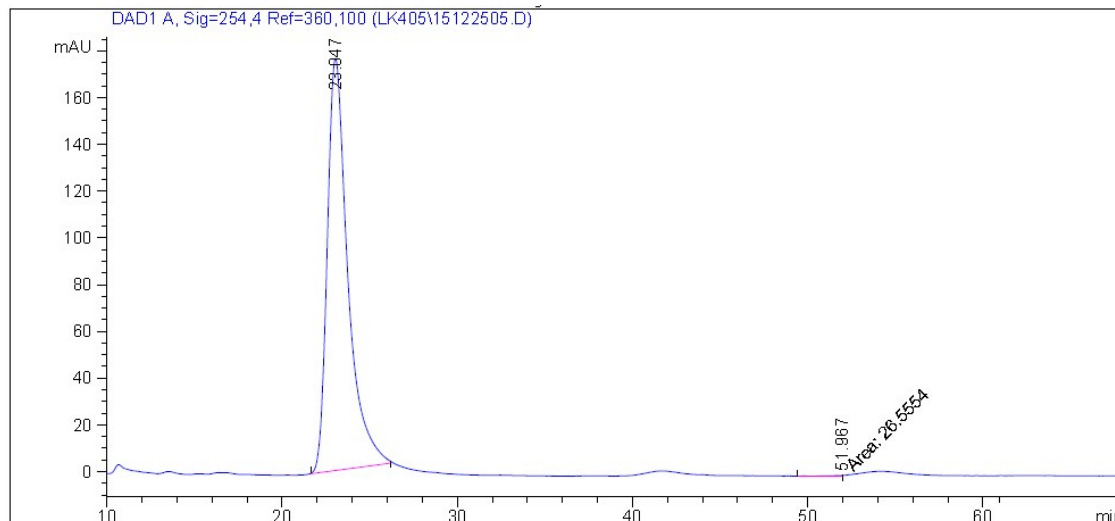

| Peak # | RetTime [min] | Type | Width [min] | Area [mAU*s] | Height [mAU] | Area %  |
|--------|---------------|------|-------------|--------------|--------------|---------|
| 1      | 23.047        | BB   | 1.2116      | 1.43729e4    | 176.20453    | 99.8156 |
| 2      | 51.967        | MM T | 1.0741      | 26.55542     | 4.12074e-1   | 0.1844  |

**(2S,4S,5R)-5-acetyl-4-(4-bromophenyl)-1-tosylpyrrolidin-2-ferrocenyl acetate (3da) and (2R,4S,5S)-5-acetyl-4-(4-bromophenyl)-1-tosylpyrrolidin-2-ferrocenyl acetate (3da')**

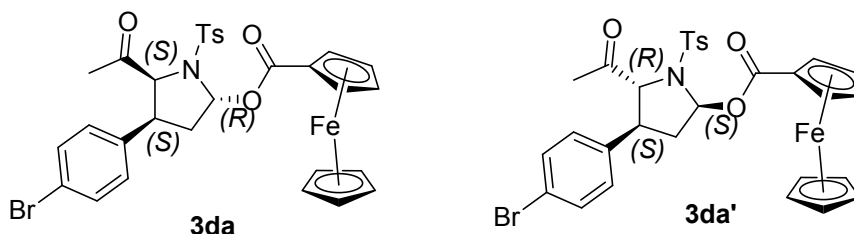

Chiral amine catalyst 2- $\{diphenyl[(trimethylsilyl)oxy]methyl\}$ pyrrolidine (0.04mmol., 13 mg, 10 mol%) was dissolved in 2.0 mL of  $CH_2Cl_2$  and benzoic acid (0.08mmol., 10 mg, 20 mol%) was added in an ordinary vial equipped with a Teflon-coated stir bar. The resulting solution was stirred at room temperature for 20 minutes, then 4-

bromocinnamaldehyde (0.4mmol) and 4-methyl-N-(2-oxopropyl)benzene-sulfonamide (0.5mmol) was added. The vial was stirring continued at room temperature for 96 hours. The crude mixture was flushed through a short plug of silica. Solvent was removed in *vacuo*. After flash column chromatography (hexane/ethyl acetate =4/1) reaction product was obtained as amorphous solid (158.0mg, 90% yield, dr=10:6, **3da** 97% ee (Fc ester), **3da'** 99% ee (FC ester)). The dr was determined by <sup>1</sup>H NMR and the ee of **3da** was determined by HPLC analysis on a Daicel Chiralpak AD-H column: hexane/*i*-PrOH 70:30, flow rate 0.80 mL/min,  $\lambda = 254.0$  nm:  $\tau_{major} = 10.2$  min  $\tau_{minor} = 35.1$  min. HRMS ESI ORBITRAP (+) m/z: calculated for C<sub>30</sub>H<sub>28</sub>BrFeNO<sub>5</sub>S 649.0221, found 672.0110 [M+Na]<sup>+</sup>. <sup>1</sup>H NMR (400 MHz, CDCl<sub>3</sub>): 7.82 (t, *J* = 7.5 Hz, 2H), 7.46 (t, *J* = 7.6 Hz, 2H), 7.34 (d, *J* = 7.2 Hz, 2H), 7.06 (t, *J* = 7.5 Hz, 2H), 6.78 (s, 1H), 4.80 (d, *J* = 8.2 Hz, 2H), 4.61 (s, 1H), 4.41 (s, 2H), 4.23 (d, *J* = 7.2 Hz, 5H), 4.00 (d, *J* = 7.8 Hz, 1H), 2.90 – 2.75 (m, 1H), 2.45 (d, *J* = 7.1 Hz, 3H), 2.23 – 2.11 (m, 1H), 1.65 (d, *J* = 7.2 Hz, 3H). <sup>13</sup>C NMR (400 MHz, CDCl<sub>3</sub>): 205.73, 170.73, 144.21, 136.48, 133.28, 132.11, 129.83, 129.63, 127.98, 122.26, 84.06, 71.55, 71.44, 70.34, 70.12, 70.07, 69.95, 69.38, 44.46, 36.13, 29.65, 21.65. Mp. (°C): 81-82.

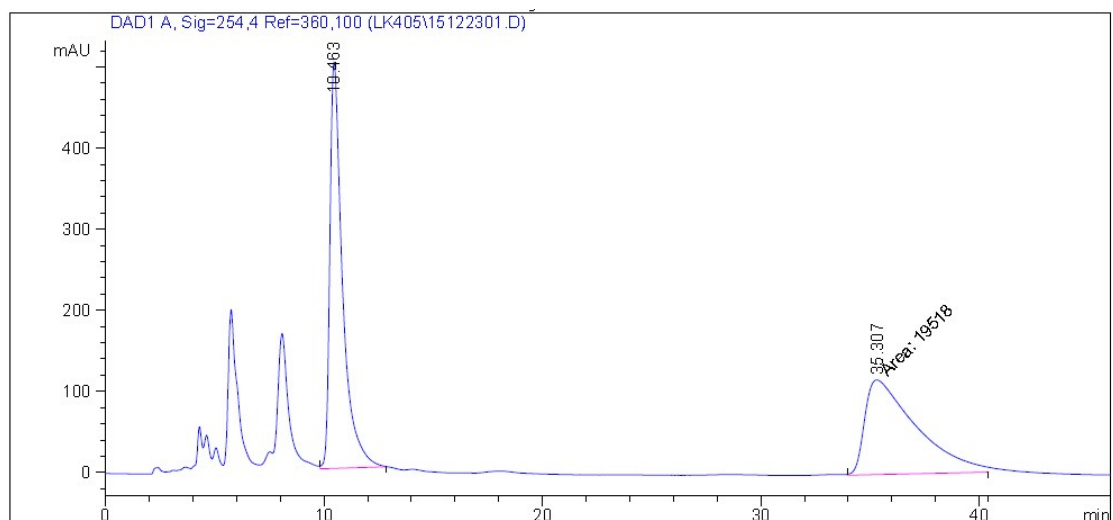

| Peak # | RetTime [min] | Type | Width [min] | Area [mAU*s] | Height [mAU] | Area %  |
|--------|---------------|------|-------------|--------------|--------------|---------|
| 1      | 10.463        | BB   | 0.5903      | 2.01965e4    | 501.05365    | 50.8543 |
| 2      | 35.307        | MM T | 2.7808      | 1.95180e4    | 116.98051    | 49.1457 |



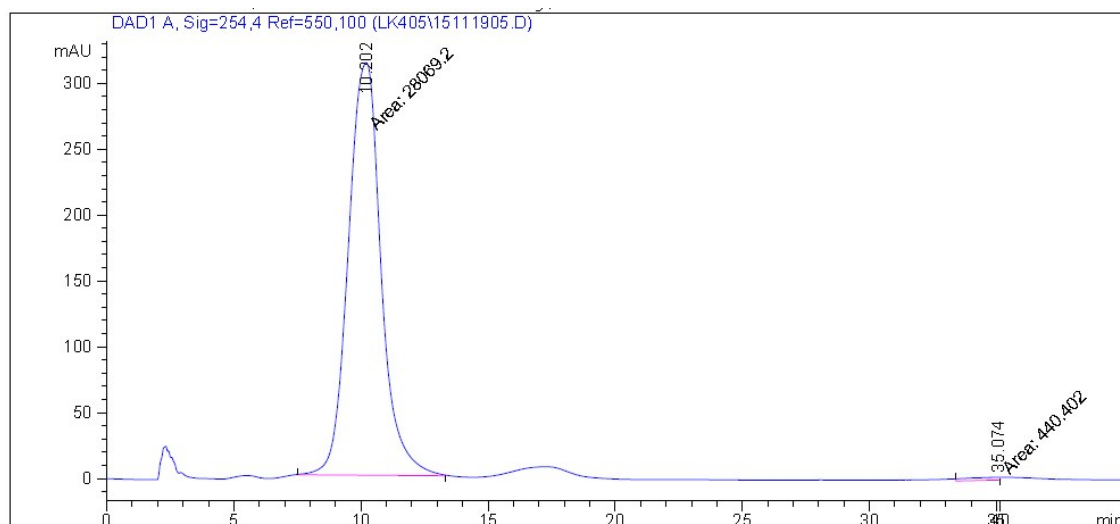

| Peak # | RetTime [min] | Type | Width [min] | Area [mAU*s] | Height [mAU] | Area %  |
|--------|---------------|------|-------------|--------------|--------------|---------|
| 1      | 10.202        | MM T | 1.4941      | 2.80692e4    | 313.11780    | 98.4552 |
| 2      | 35.074        | MM T | 2.8738      | 440.40234    | 2.55410      | 1.5448  |

The ee of **3da'** was determined by HPLC analysis on a Daicel Chiralpak AD-H column: hexane/*i*-PrOH 70:30, flow rate 0.80 mL/min,  $\lambda = 254.0$  nm;  $\tau_{major} = 18.1$  min,  $\tau_{minor} = 34.0$  min. HRMS ESI ORBITRAP (+) m/z: calculated for  $C_{30}H_{28}BrFeNO_5S$  649.0221, found 672.0110 [M+Na]<sup>+</sup>. <sup>1</sup>H NMR (400 MHz, CDCl<sub>3</sub>): 7.80 (d,  $J = 8.2$  Hz, 2H), 7.38 (dd,  $J = 8.1, 4.0$  Hz, 4H), 6.87 (d,  $J = 8.4$  Hz, 2H), 6.71 (d,  $J = 5.0$  Hz, 1H), 4.83 (d,  $J = 26.0$  Hz, 2H), 4.51 – 4.43 (m, 2H), 4.31 (s, 5H), 4.02 (d,  $J = 9.2$  Hz, 1H), 3.57 (dd,  $J = 17.3, 10.4$  Hz, 1H), 2.51 (s, 3H), 2.48 (s, 3H), 2.30 (dd,  $J = 13.5, 6.4$  Hz, 1H), 1.99 – 1.87 (m, 1H). <sup>13</sup>C NMR (400 MHz, CDCl<sub>3</sub>): 206.00, 170.44, 144.85, 136.39, 134.66, 130.20, 128.93, 127.48, 121.79, 84.60, 74.35, 71.90, 71.75, 70.12, 69.96, 70.04, 45.67, 40.84, 29.70, 25.36, 21.69. Mp. (°C): 92-93.

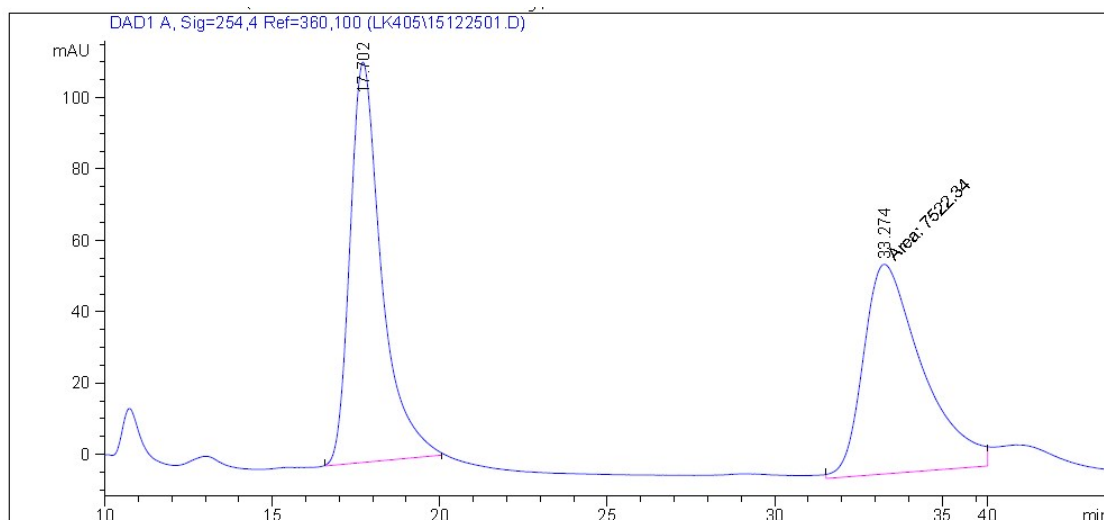

| Peak # | RetTime [min] | Type | Width [min] | Area [mAU*s] | Height [mAU] | Area %  |
|--------|---------------|------|-------------|--------------|--------------|---------|
| 1      | 17.702        | BB   | 0.9413      | 7362.47559   | 112.23239    | 49.4630 |
| 2      | 33.274        | MM T | 2.1257      | 7522.33936   | 58.97816     | 50.5370 |

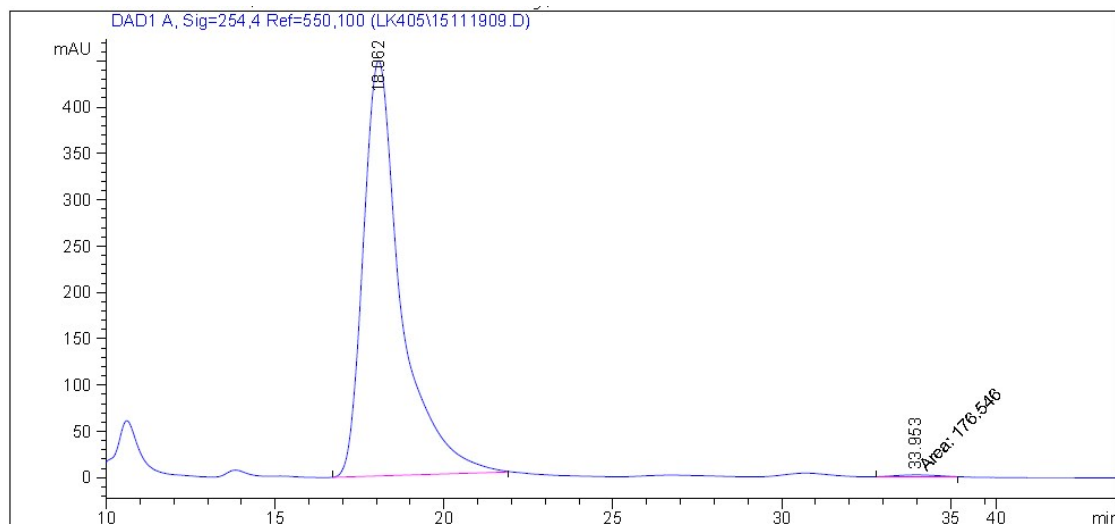

| Peak # | RetTime [min] | Type | Width [min] | Area [mAU*s] | Height [mAU] | Area %  |
|--------|---------------|------|-------------|--------------|--------------|---------|
| 1      | 18.062        | BB   | 1.1551      | 3.48755e4    | 448.52765    | 99.4963 |
| 2      | 33.953        | MM T | 1.4095      | 176.54646    | 2.08758      | 0.5037  |

**(2S,4S,5R)-5-acetyl-4-(4-methoxyphenyl)-1-tosylpyrrolidin-2-ferrocenyl acetate (3fa) and (2R,4S,5S)-5-acetyl-4-(4-methoxyphenyl)-1-tosylpyrrolidin-2-ferrocenyl acetate (3fa')**

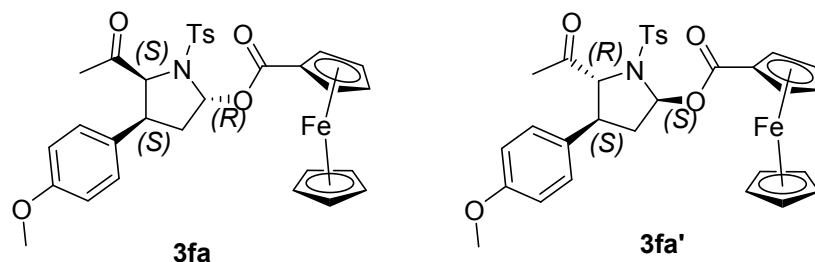

Chiral amine catalyst 2-{diphenyl[(trimethylsilyl)oxy]methyl}pyrrolidine (0.04mmol., 13 mg, 10 mol%) was dissolved in 2.0 mL of CH<sub>2</sub>Cl<sub>2</sub> and benzoic acid (0.08mmol., 10 mg, 20 mol%) was added in an ordinary vial equipped with a Teflon-coated stir bar .

The resulting solution was stirred at room temperature for 20 minutes, then 4-methoxyphenylacrylaldehyde (0.4mmol) and 4-methyl-N-(2-oxopropyl)benzene-sulfonamide (0.5mmol) was added. The vial was stirring continued at room temperature for 96 hours. The crude mixture was flushed through a short plug of silica. Solvent was removed in *vacuo*. After flash column chromatography (hexane/ethyl acetate =4/1) reaction product was obtained as amorphous solid (154.7mg, 99% yield, dr=10:6, **3fa** >99% ee (Fc Ester), **3fa'** 97% ee (Fc ester)). The dr was determined by <sup>1</sup>H NMR and the ee of **3fa** was determined by HPLC analysis on a Daicel Chiralpak AD-H column: hexane/*i*-PrOH 70:30, flow rate 0.80 mL/min, λ = 254.0 nm: τ<sub>major</sub> = 9.6 min, τ<sub>minor</sub> = 30.4 min. HRMS ESI ORBITRAP (+) m/z: calculated for C<sub>31</sub>H<sub>31</sub>FeNO<sub>6</sub>S 601.1222, found 624.1108 [M+Na]<sup>+</sup>. <sup>1</sup>H NMR (400 MHz, CDCl<sub>3</sub>): 7.82 (d, *J* = 8.3 Hz, 2H), 7.31 (d, *J* = 8.0 Hz, 2H), 7.10 (d, *J* = 8.7 Hz, 2H), 6.84 (d, *J* = 8.7 Hz, 2H), 6.77 (d, *J* = 4.6 Hz, 1H), 4.78 (d, *J* = 8.8 Hz, 2H), 4.60 – 4.57 (m, 1H), 4.43 – 4.37 (m, 2H), 4.23 (s, 5H), 4.01 (dd, *J* = 11.1, 5.7 Hz, 1H), 3.78 (s, 3H), 2.82 (td, *J* = 13.5, 4.8 Hz, 1H), 2.44 (s, 3H), 2.15 (dd, *J* = 13.2, 5.8 Hz, 1H), 1.61 (s, 3H). <sup>13</sup>C NMR (400 MHz, CDCl<sub>3</sub>): 206.09 , 170.73 , 159.36 , 144.05 , 136.70 , 129.63 , 129.20 , 127.94 , 114.31 , 84.18 , 71.51, 71.38, 70.39, 70.31, 70.10, 69.92, 69.66 , 55.27 , 44.35 , 36.31 , 29.53, 21.64. Mp. (°C): 173-174.

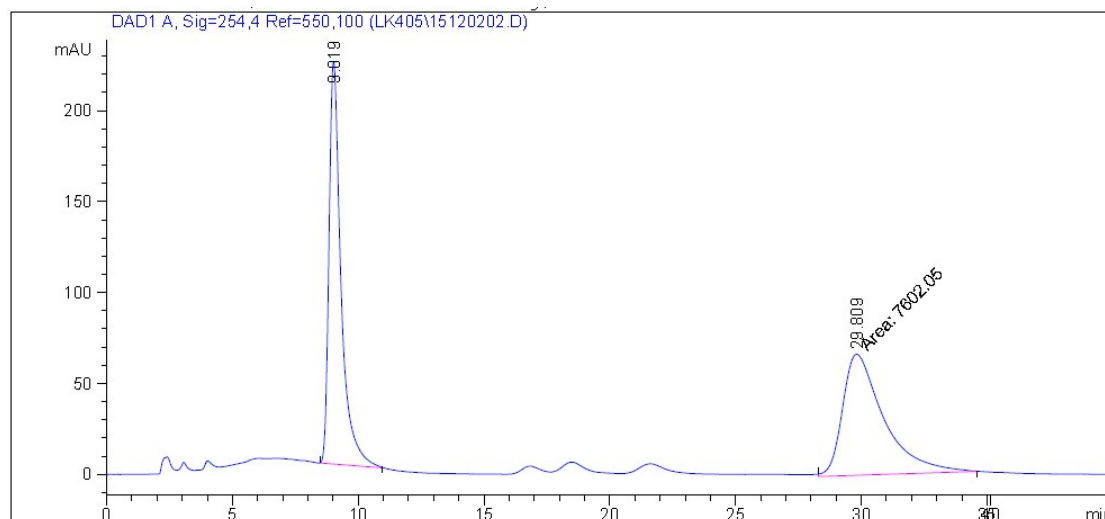

| Peak # | RetTime [min] | Type | Width [min] | Area [mAU*s] | Height [mAU] | Area %  |
|--------|---------------|------|-------------|--------------|--------------|---------|
| 1      | 9.019         | BB   | 0.4903      | 7335.48926   | 221.53583    | 49.1078 |
| 2      | 29.809        | MM T | 1.9015      | 7602.04785   | 66.63309     | 50.8922 |

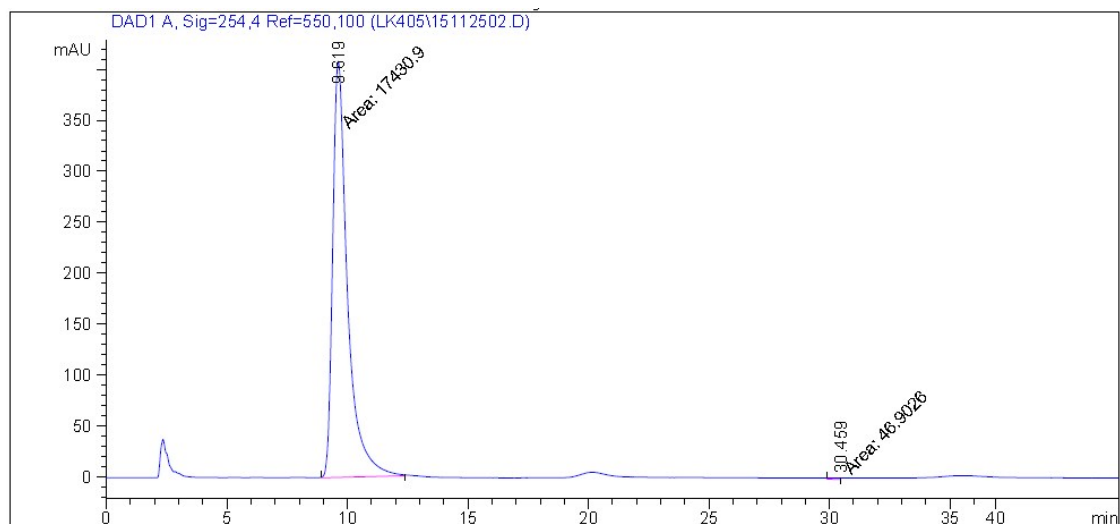

| Peak # | RetTime [min] | Type | Width [min] | Area [mAU*s] | Height [mAU] | Area %  |
|--------|---------------|------|-------------|--------------|--------------|---------|
| 1      | 9.619         | MM T | 0.7120      | 1.74309e4    | 408.04706    | 99.7316 |
| 2      | 30.459        | MM T | 0.4930      | 46.90265     | 1.58558      | 0.2684  |

The ee of **3fc'** was determined by HPLC analysis on a Daicel Chiralpak AD-H column: hexane/*i*-PrOH 70:30, flow rate 0.80 mL/min,  $\lambda = 254.0$  nm:  $\tau_{major} = 9.6$  min,  $\tau_{minor} = 35.5$  min. HRMS ESI ORBITRAP (+) m/z: calculated for  $C_{31}H_{31}FeNO_6S$  601.1222, found 624.1108 [M+Na]<sup>+</sup>. <sup>1</sup>H NMR (400 MHz, CDCl<sub>3</sub>): 7.82 (d,  $J = 8.2$  Hz, 2H), 7.38 (d,  $J = 8.1$  Hz, 2H), 6.93 (d,  $J = 8.6$  Hz, 2H), 6.80 (d,  $J = 8.7$  Hz, 2H), 6.69 (d,  $J = 5.0$  Hz, 1H), 4.83 (d,  $J = 19.0$  Hz, 2H), 4.46 (s, 2H), 4.31 (s, 5H), 4.01 (d,  $J = 9.6$  Hz, 1H), 3.77 (s, 3H), 3.56 (ddd,  $J = 12.5, 9.8, 6.3$  Hz, 1H), 2.47 (s, 3H), 2.46 (s, 3H), 2.28 (dd,  $J = 13.5, 6.3$  Hz, 1H), 1.93 (td,  $J = 13.1, 5.1$  Hz, 1H). <sup>13</sup>C NMR (400 MHz, CDCl<sub>3</sub>): 205.99, 170.47, 159.19, 144.65, 134.84, 130.13, 128.28, 127.54, 114.41, 84.64, 74.60, 71.81, 71.68, 70.47, 70.09, 69.98, 55.28, 45.74, 41.25, 29.70, 25.30, 21.66. Mp. (°C): 218-219.

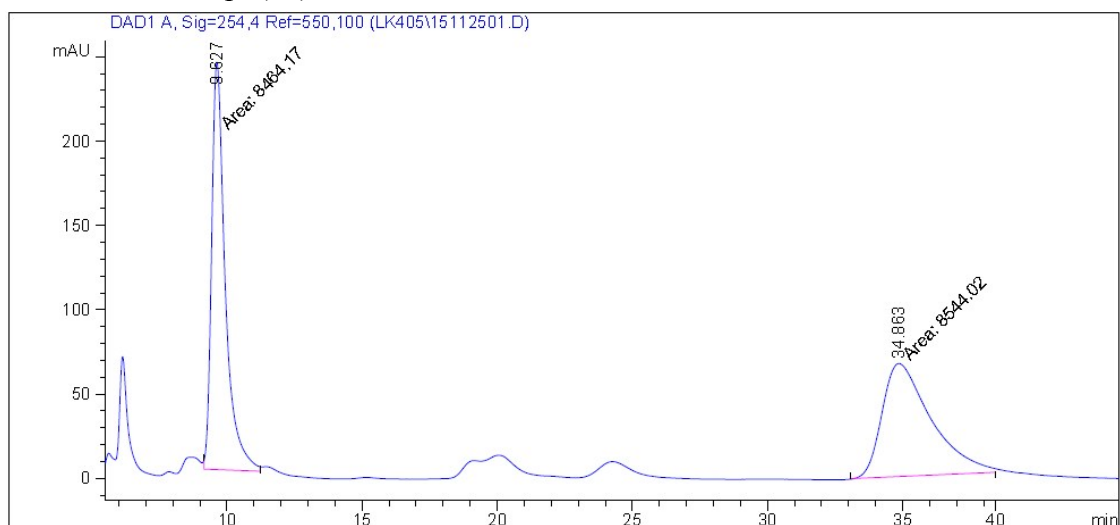

| Peak # | RetTime [min] | Type | Width [min] | Area [mAU*s] | Height [mAU] | Area %  |
|--------|---------------|------|-------------|--------------|--------------|---------|
| 1      | 9.627         | MM T | 0.5841      | 8464.16504   | 241.49837    | 49.7652 |
| 2      | 34.863        | MM T | 2.1203      | 8544.01953   | 67.16100     | 50.2348 |

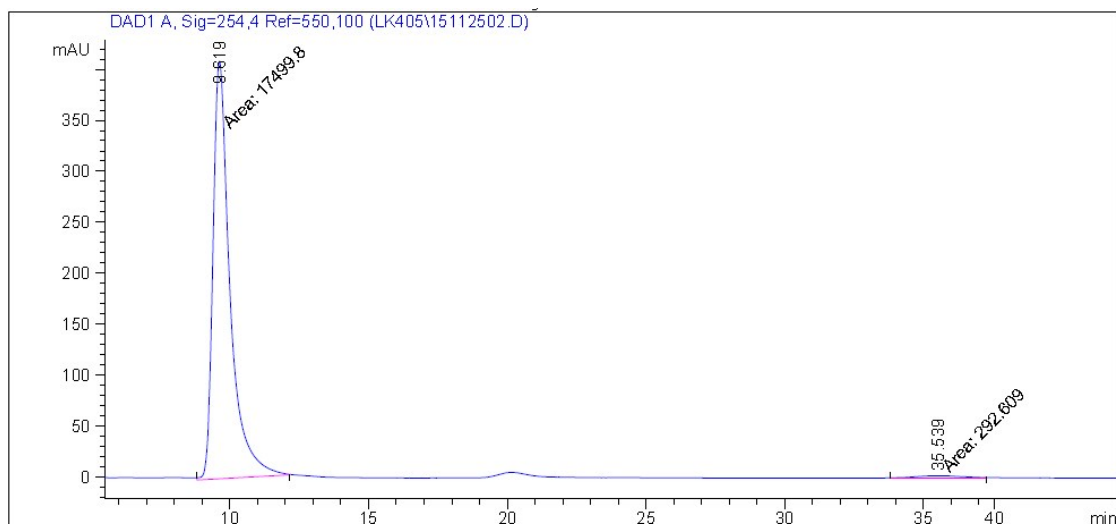

| Peak # | RetTime [min] | Type | Width [min] | Area [mAU*s] | Height [mAU] | Area %  |
|--------|---------------|------|-------------|--------------|--------------|---------|
| 1      | 9.619         | MM T | 0.7127      | 1.74998e4    | 409.26483    | 98.3554 |
| 2      | 35.539        | MM T | 2.0838      | 292.60944    | 2.34040      | 1.6446  |

## NMR spectra

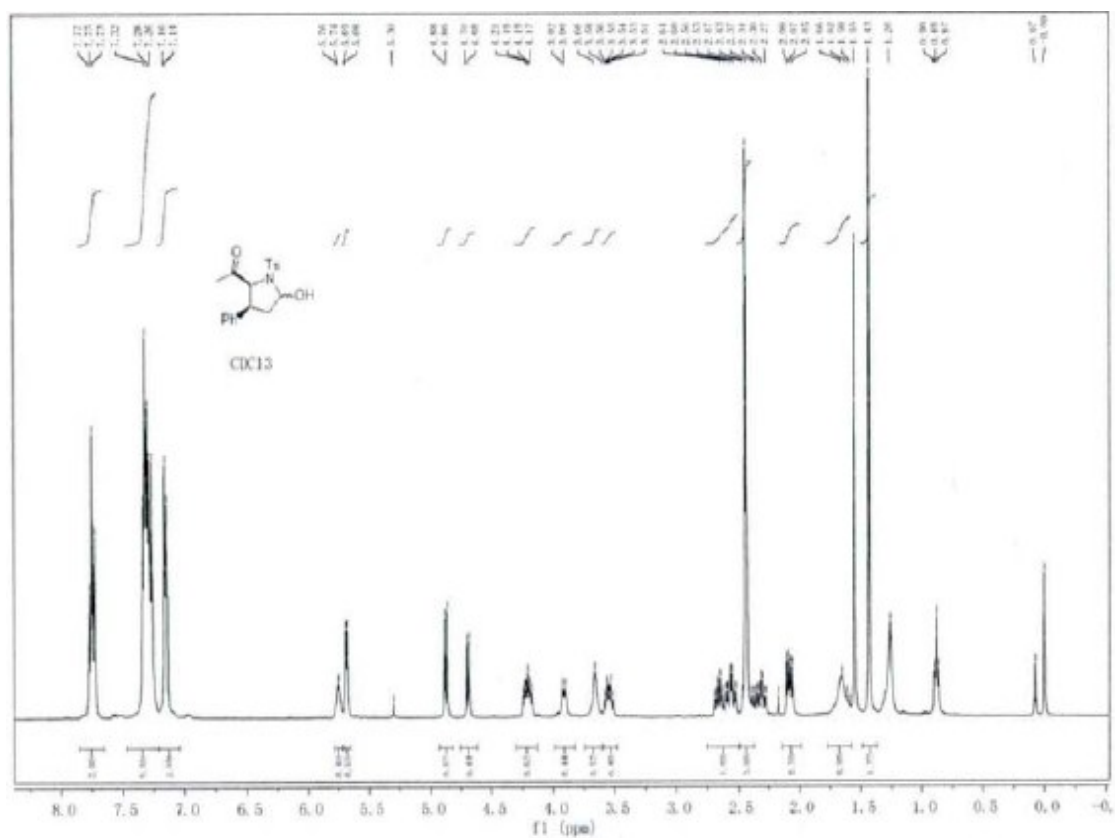

Compound 3aa <sup>1</sup>H NMR

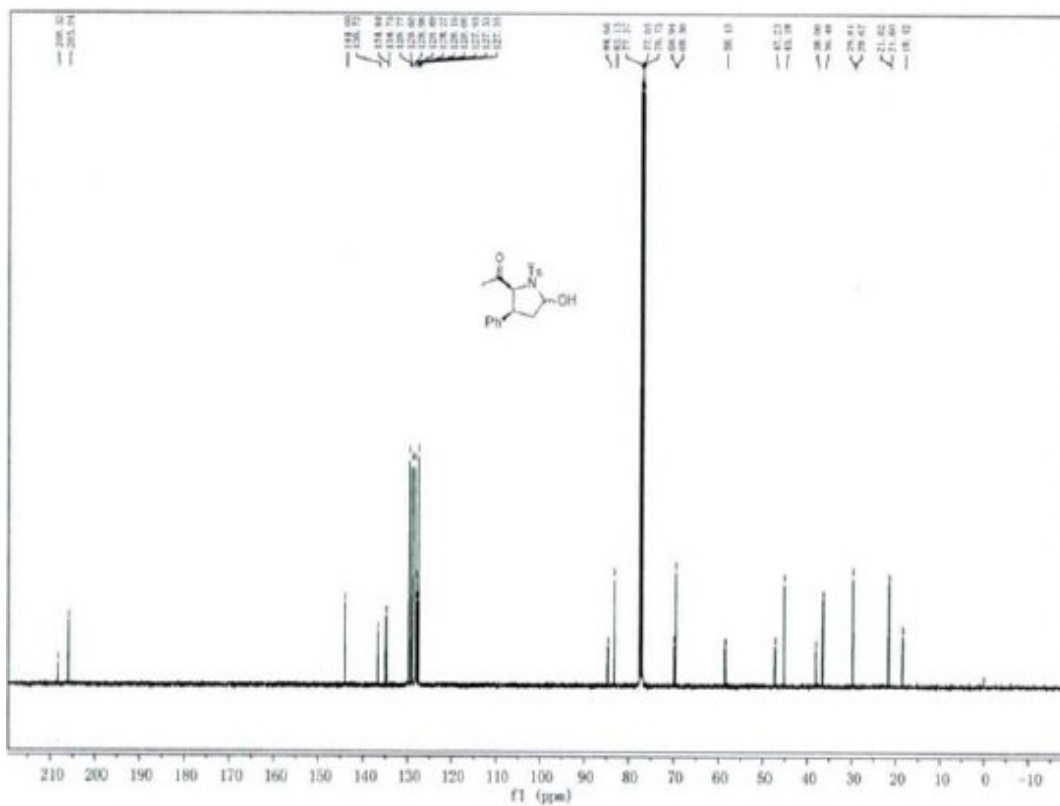

Compound 3aa <sup>13</sup>C NMR

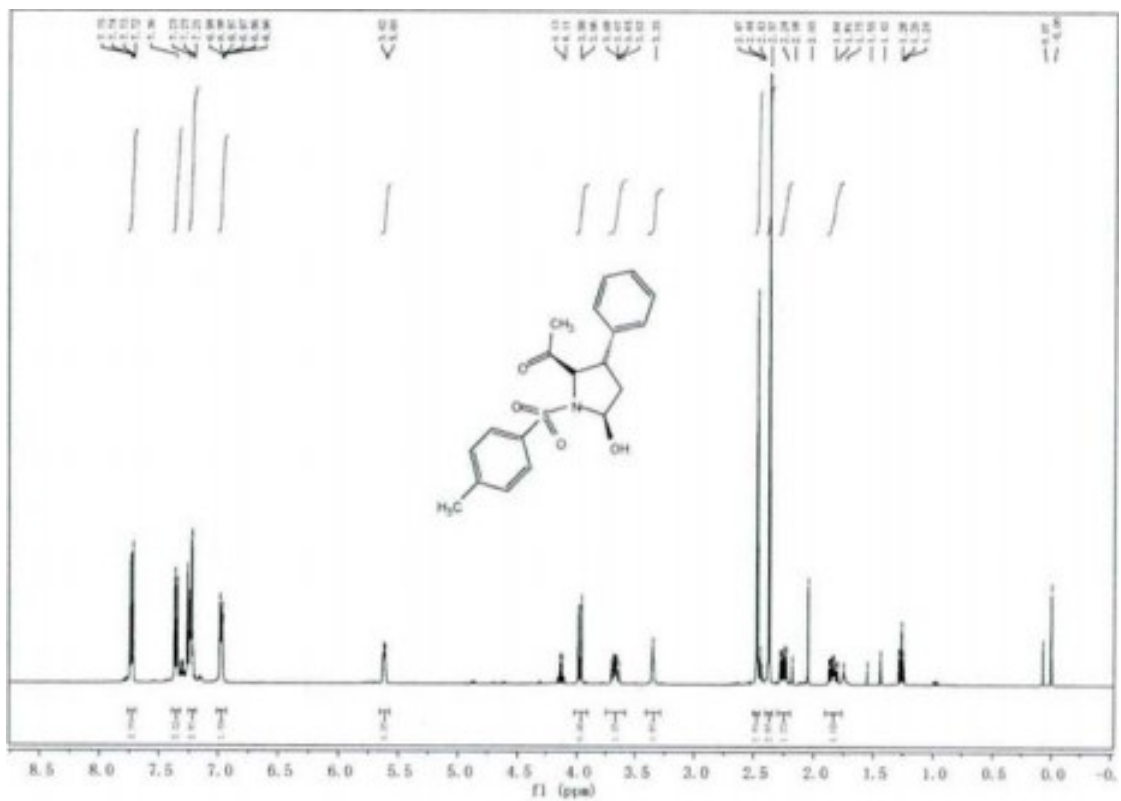

Compound 3aa' <sup>1</sup>H NMR

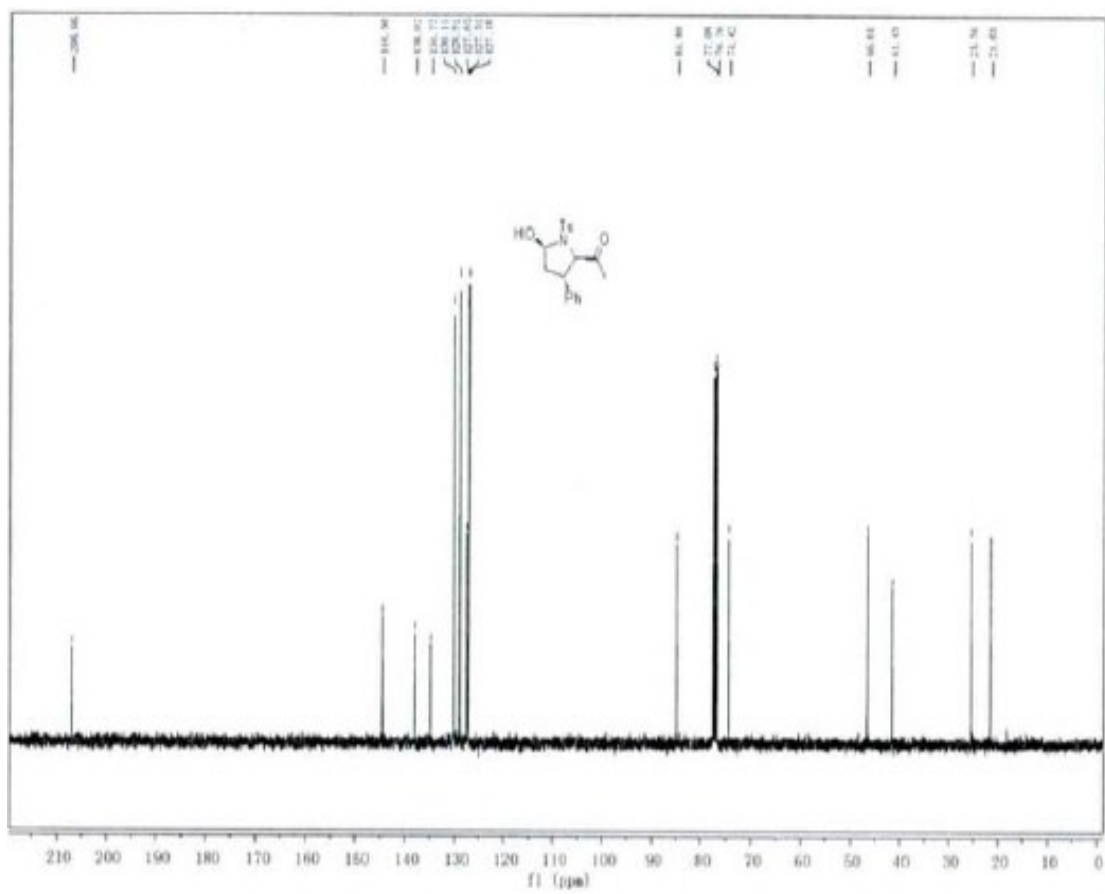

Compound 3aa' <sup>13</sup>C NMR

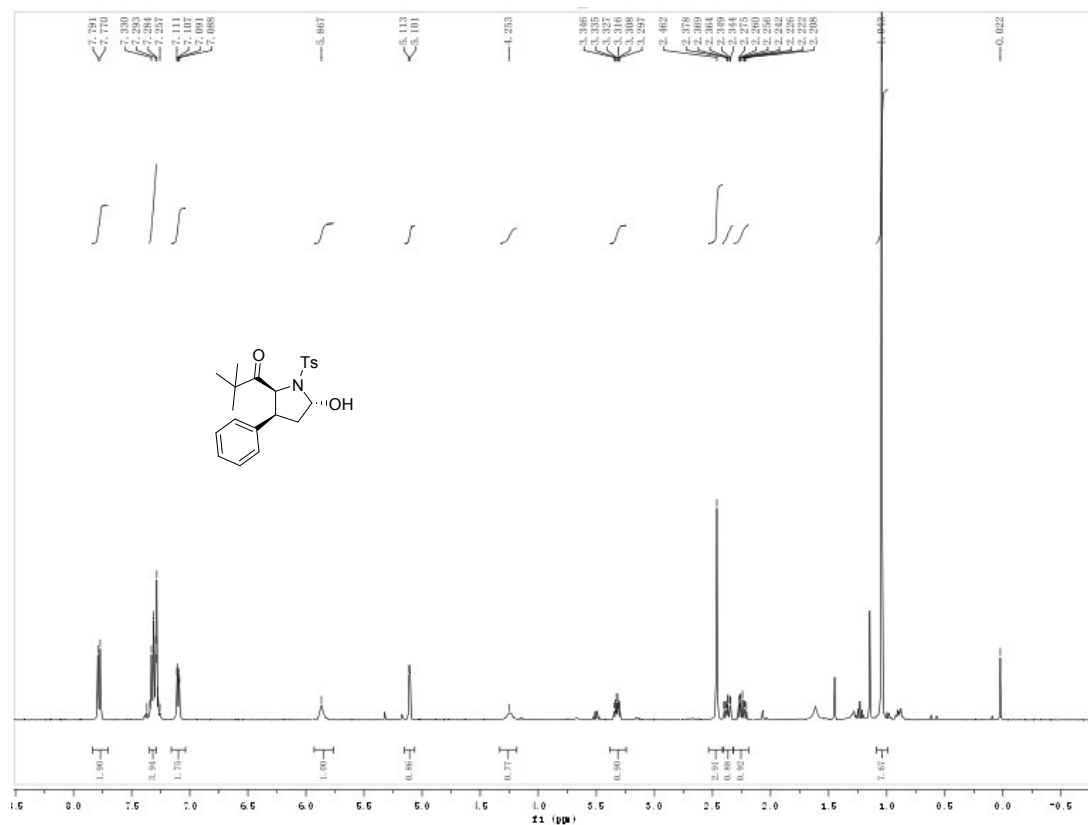

Compound 3af <sup>1</sup>H NMR

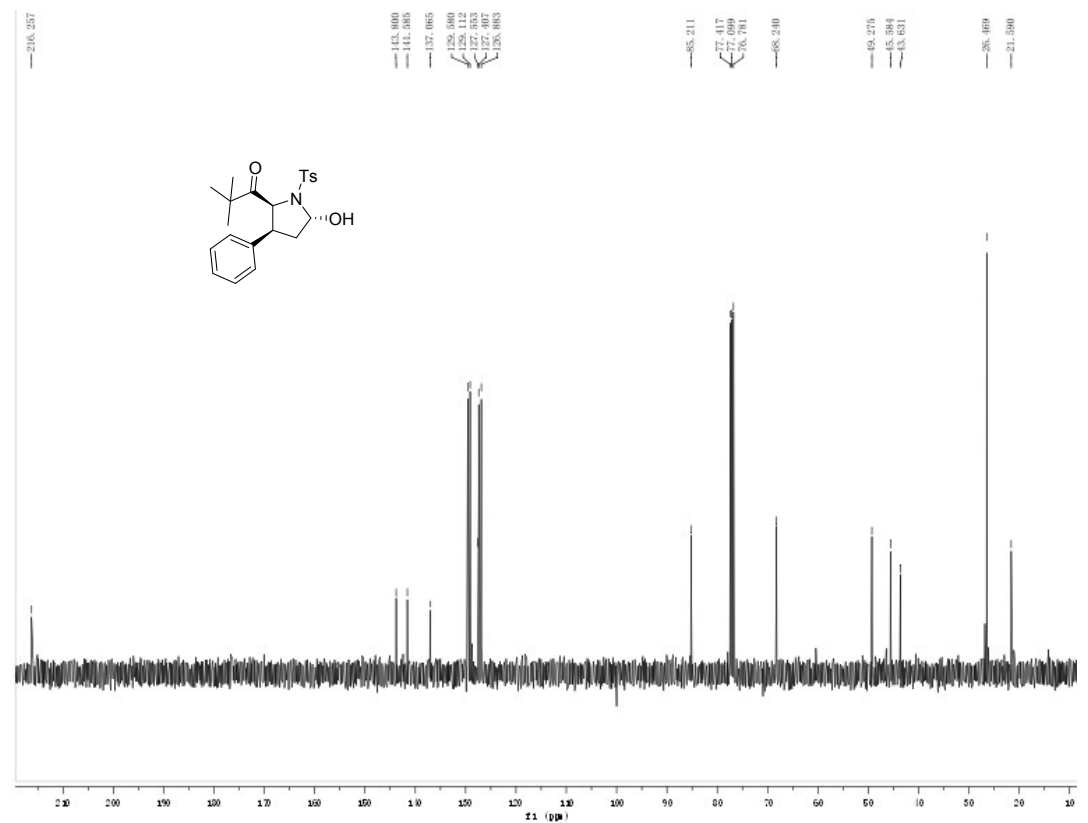

Compound 3af <sup>13</sup>C NMR



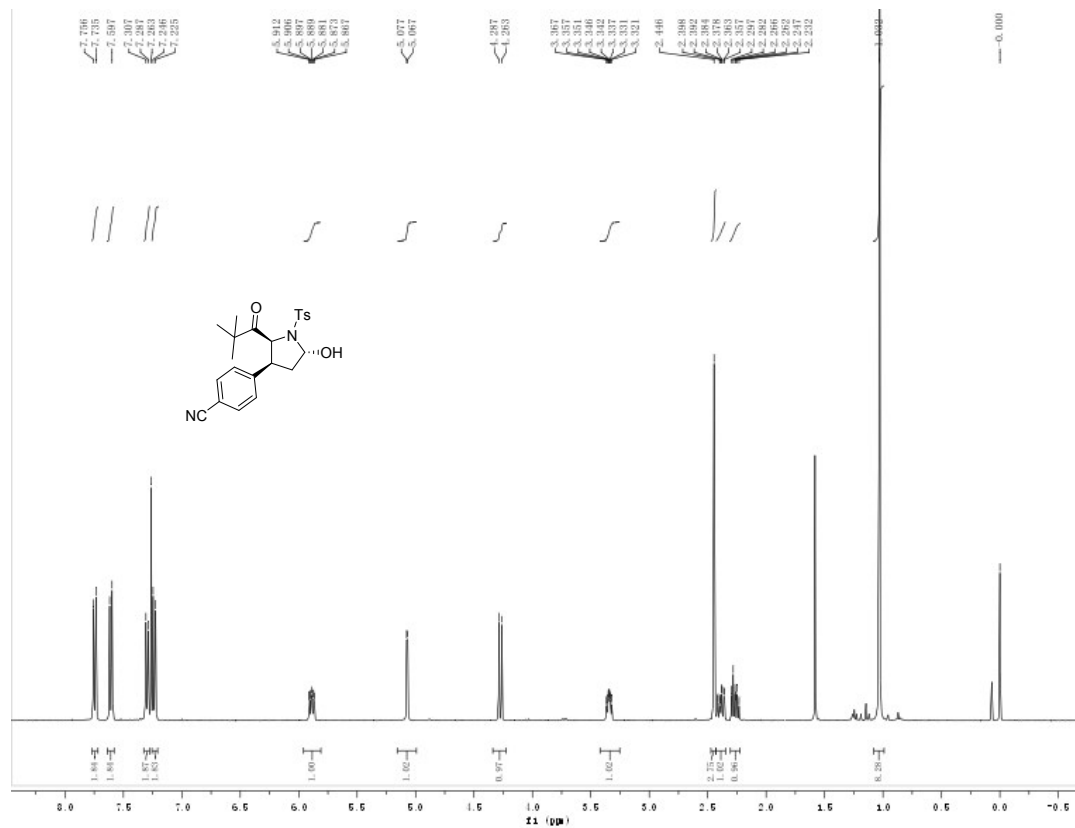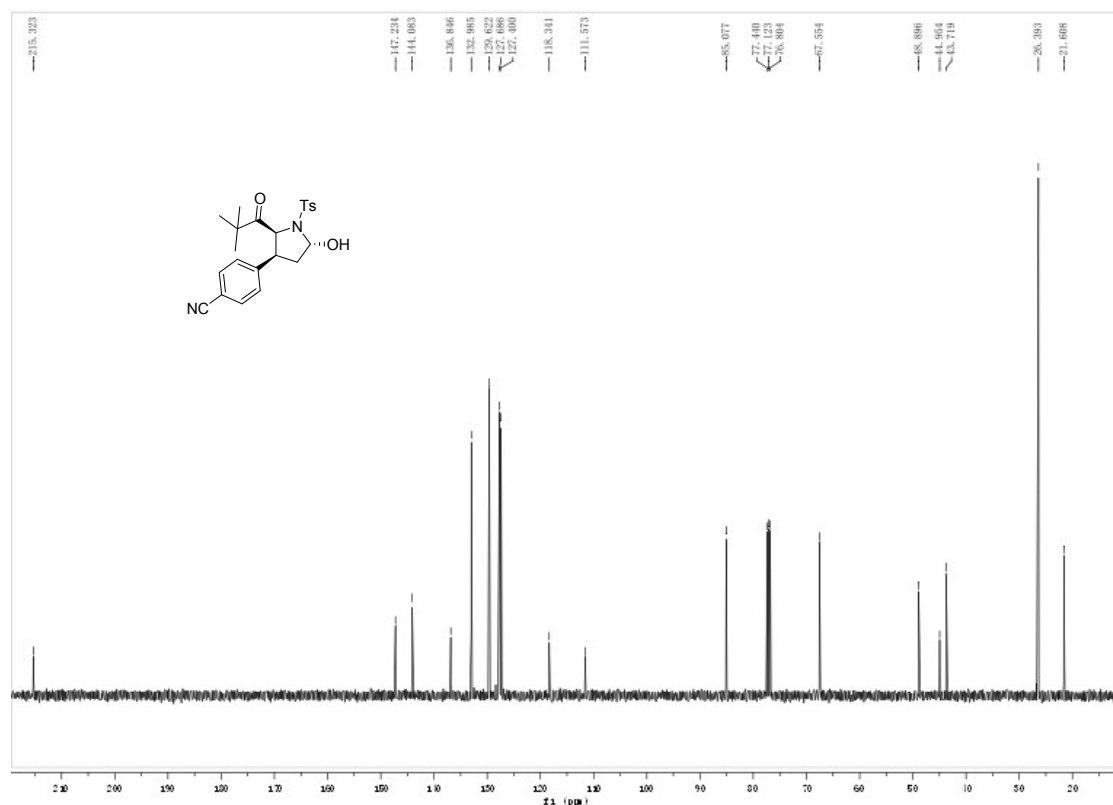

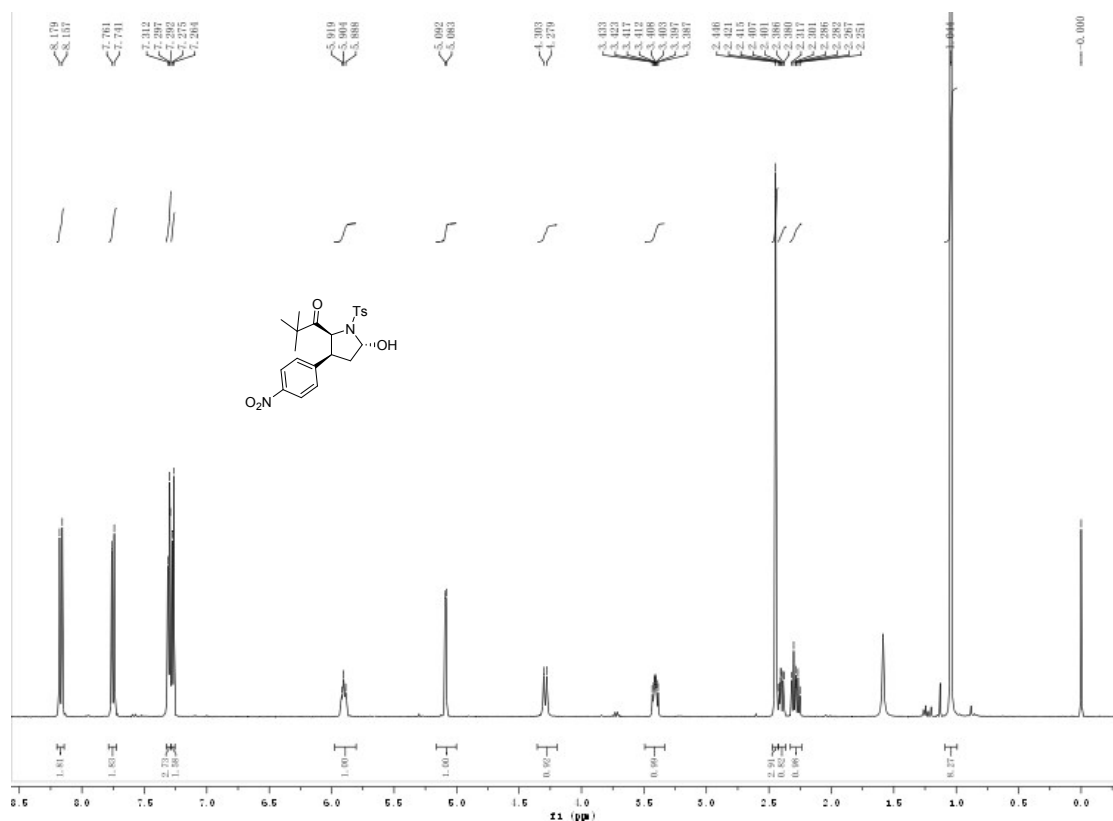

Compound 3cf <sup>1</sup>H NMR

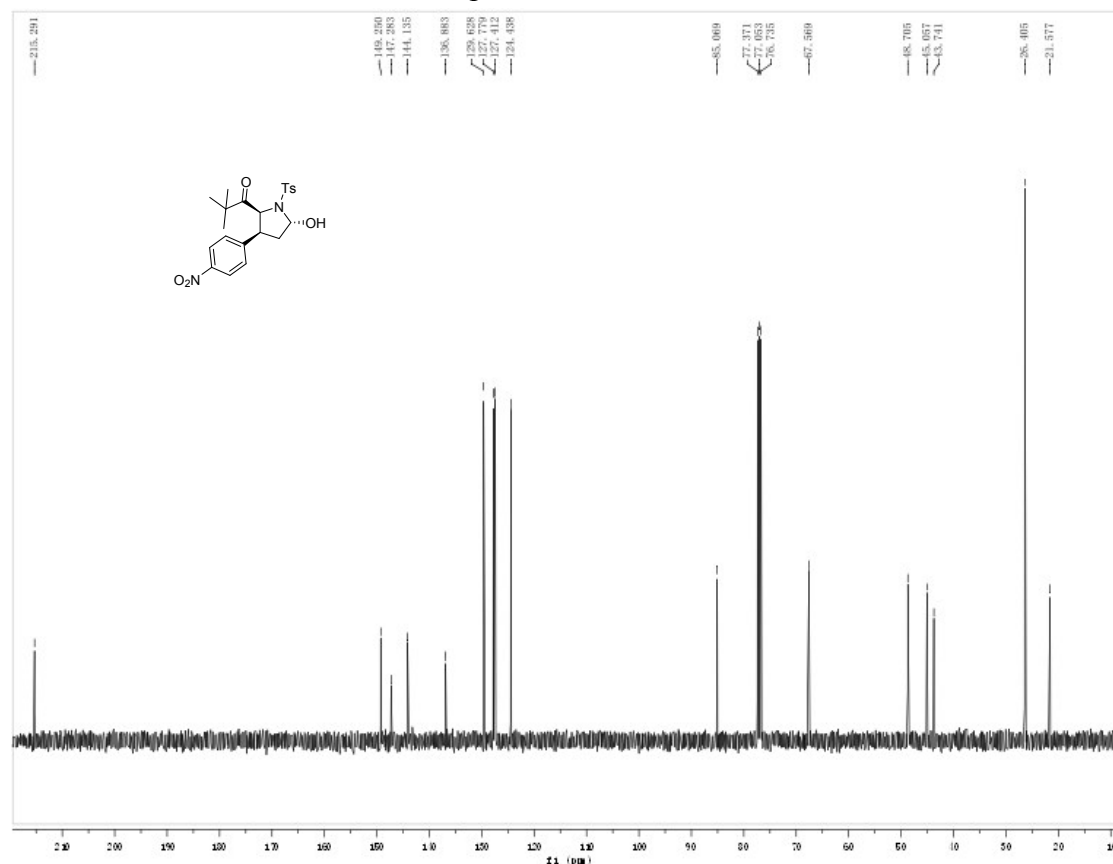

Compound 3cf <sup>13</sup>C NMR

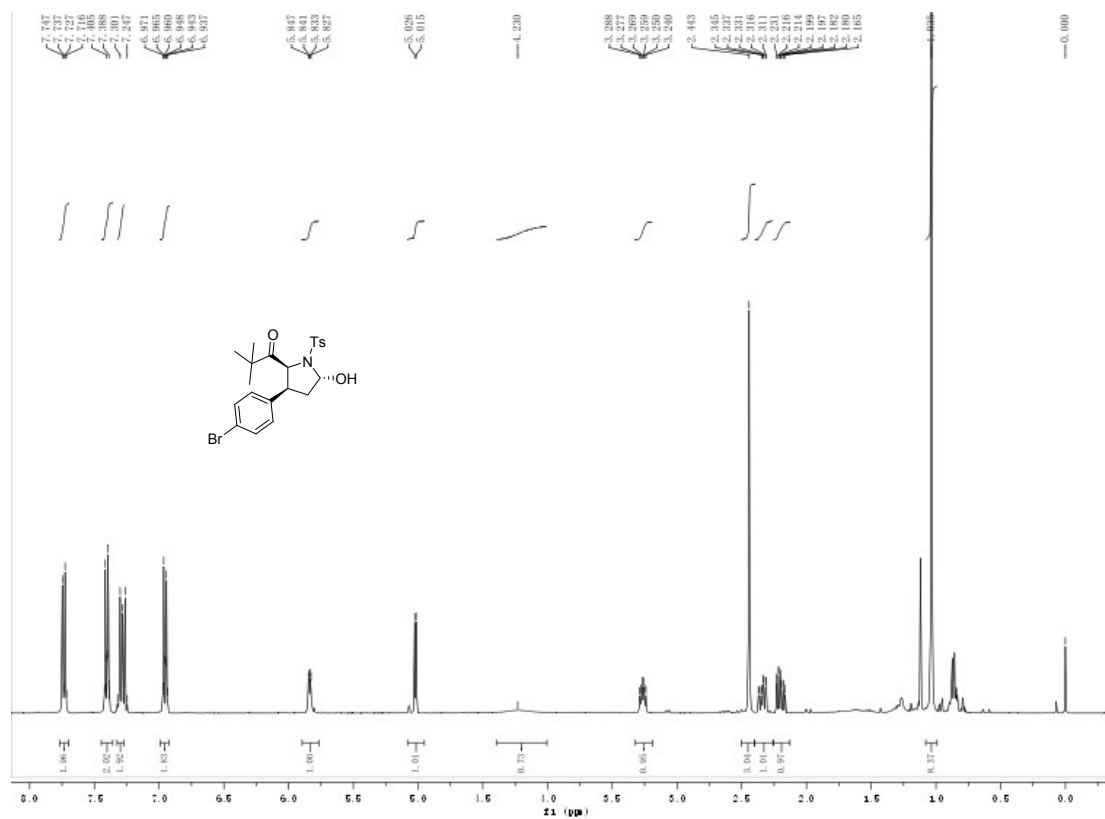

Compound **3df**  $^1\text{H NMR}$

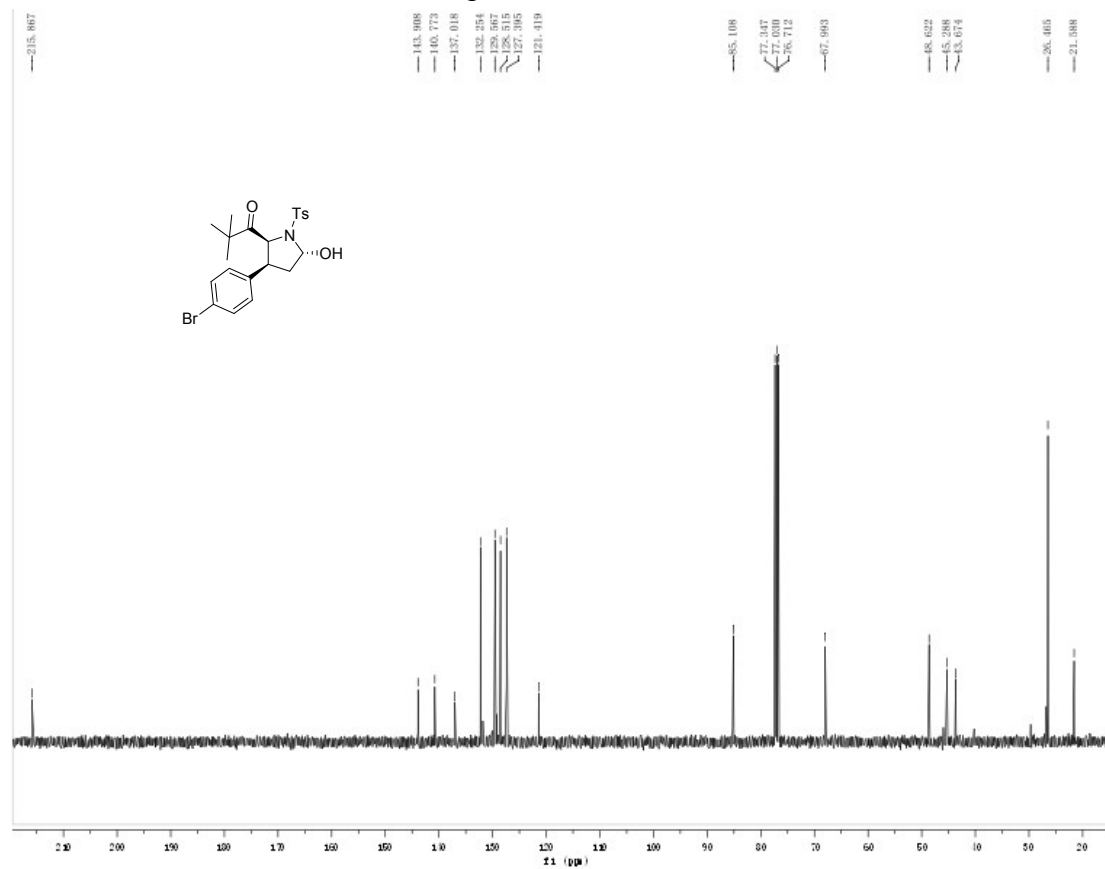

Compound **df**  $^{13}\text{C NMR}$

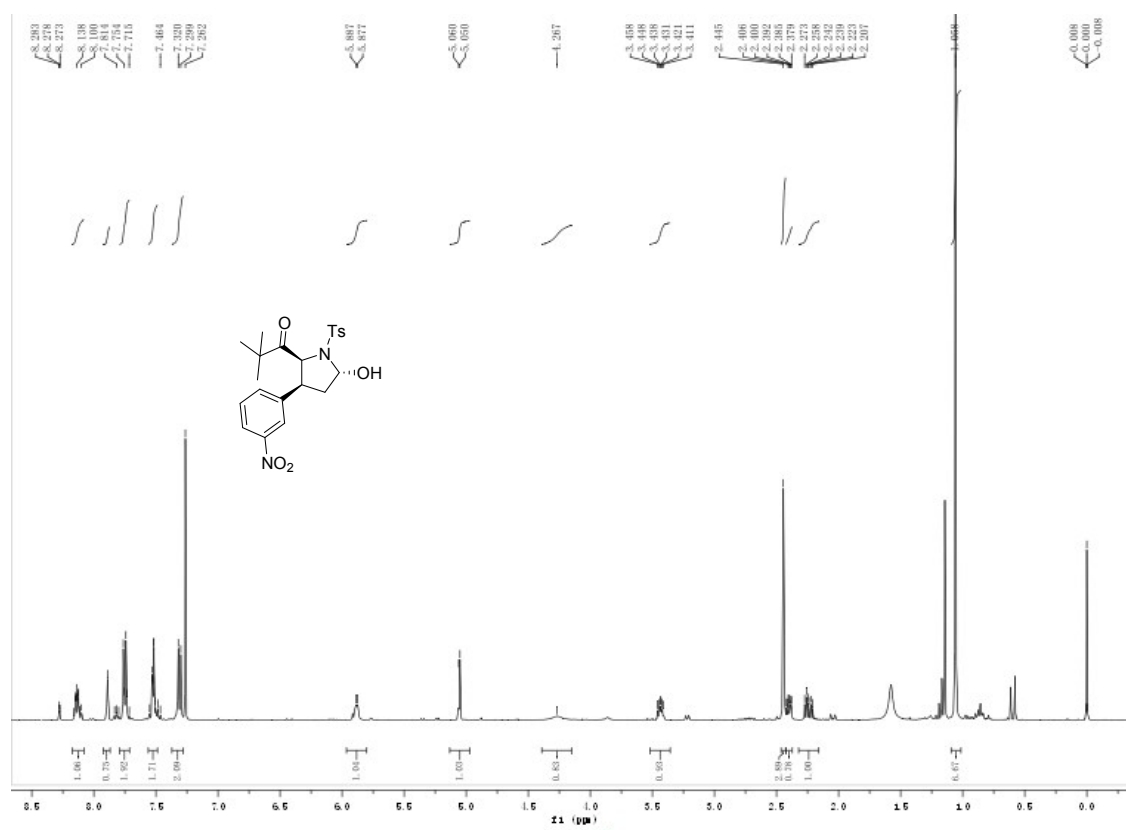

Compound 3ef <sup>1</sup>H NMR

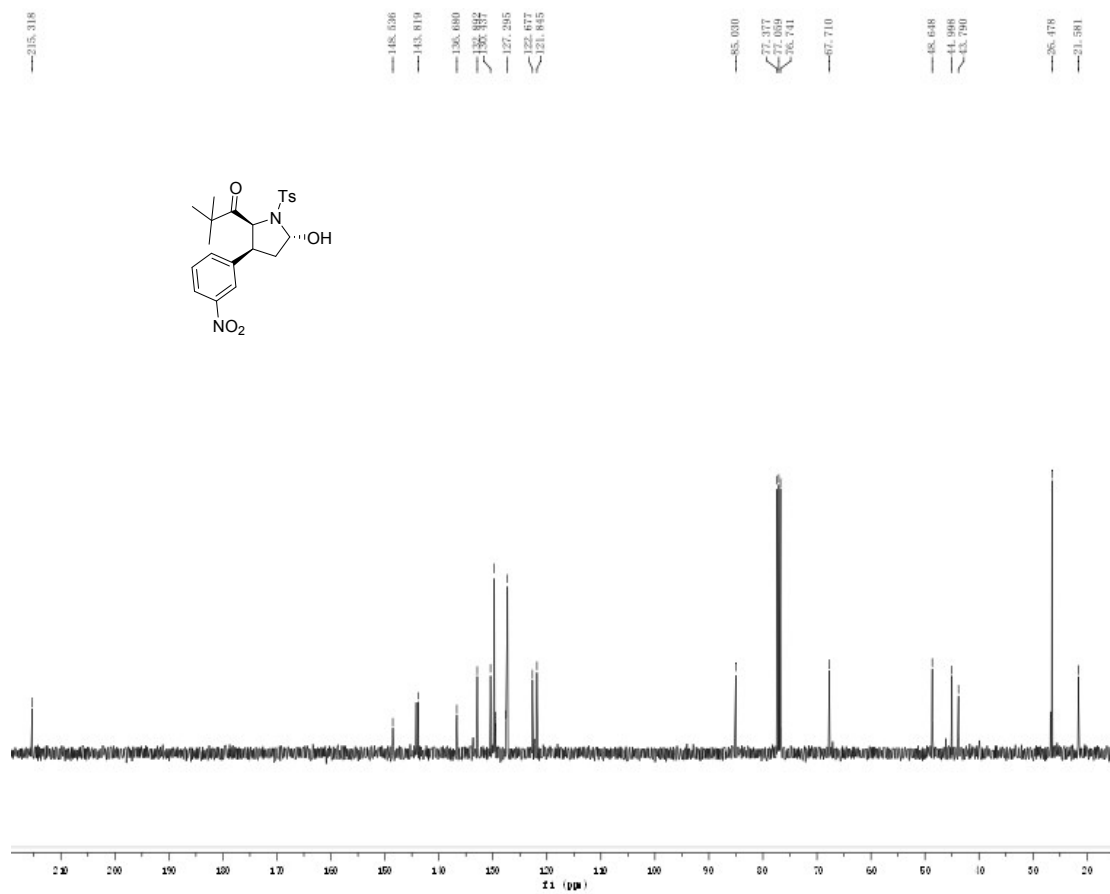

Compound 3ef <sup>13</sup>C NMR

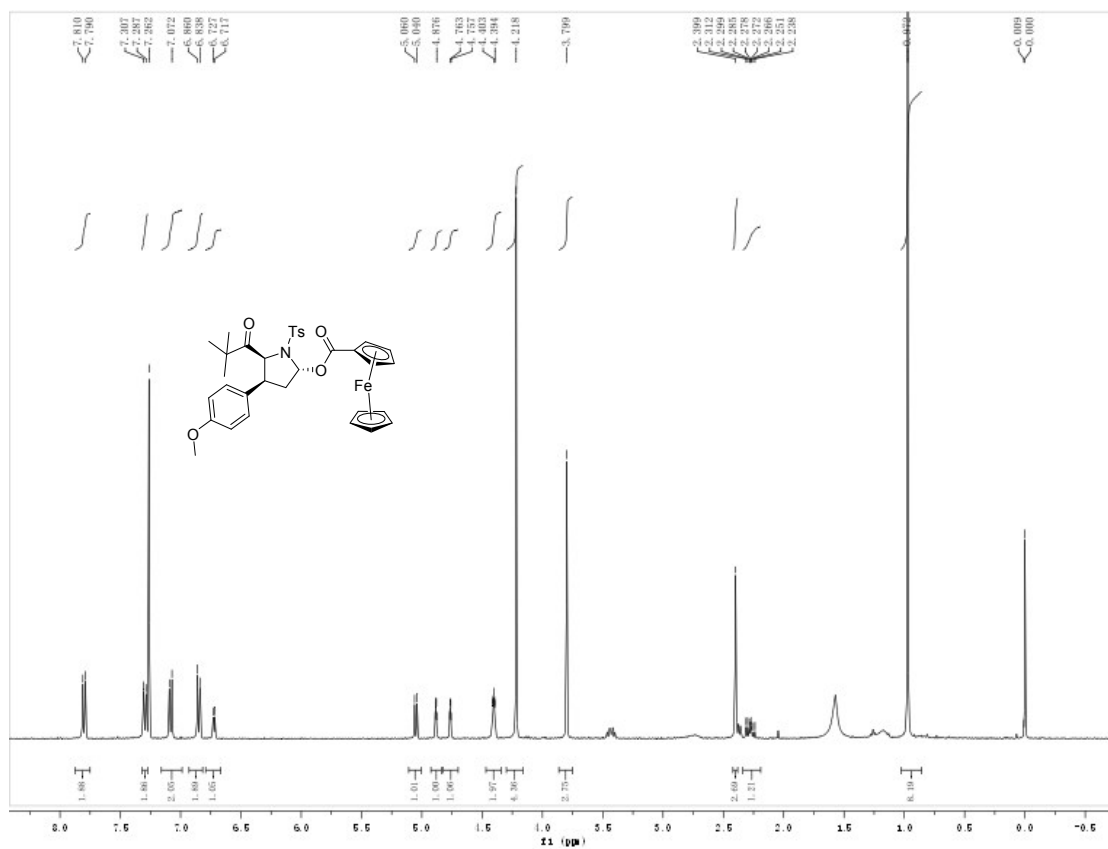

Compound 3ff <sup>1</sup>H NMR

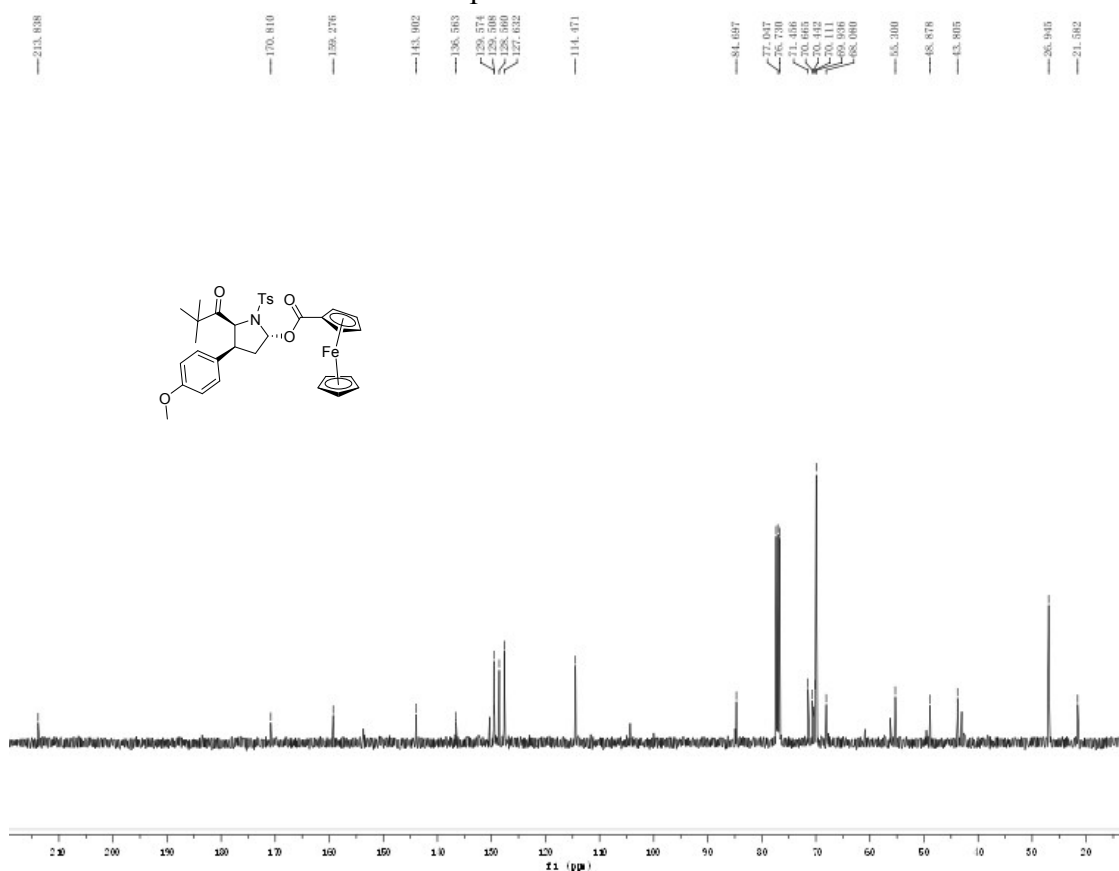

Compound 3ff <sup>13</sup>C NMR

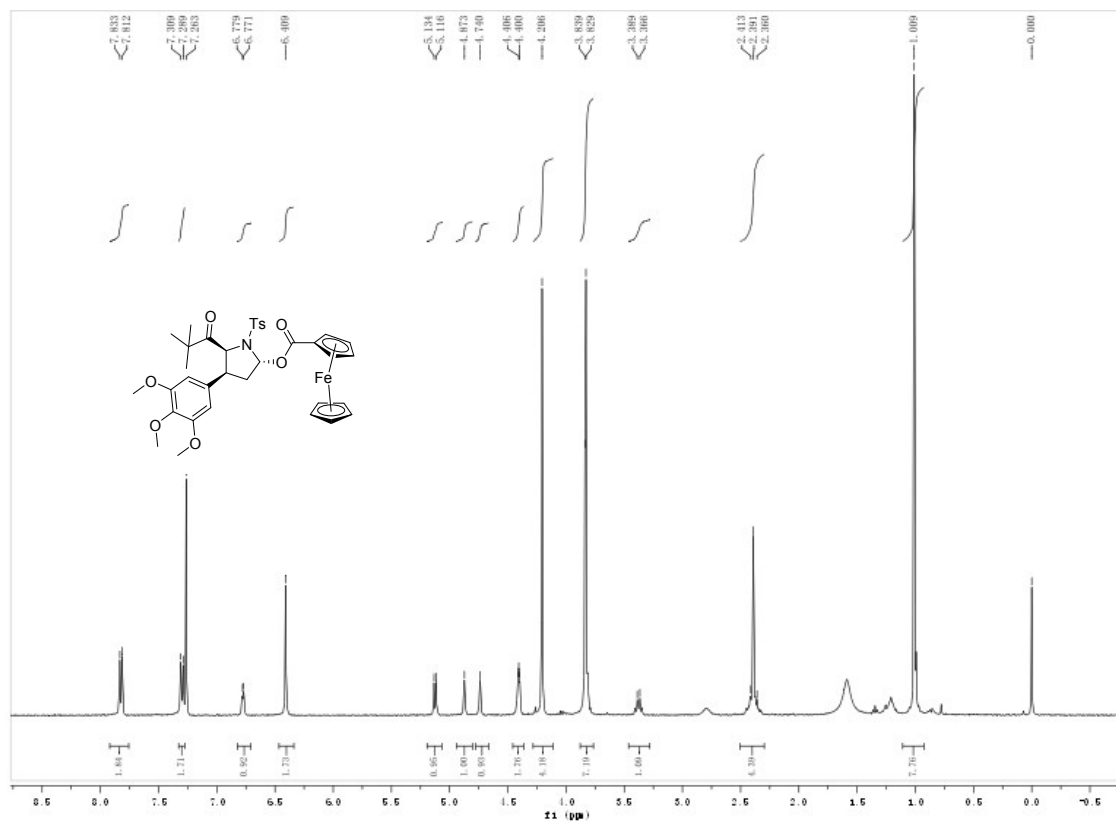

Compound 3gf <sup>1</sup>H NMR

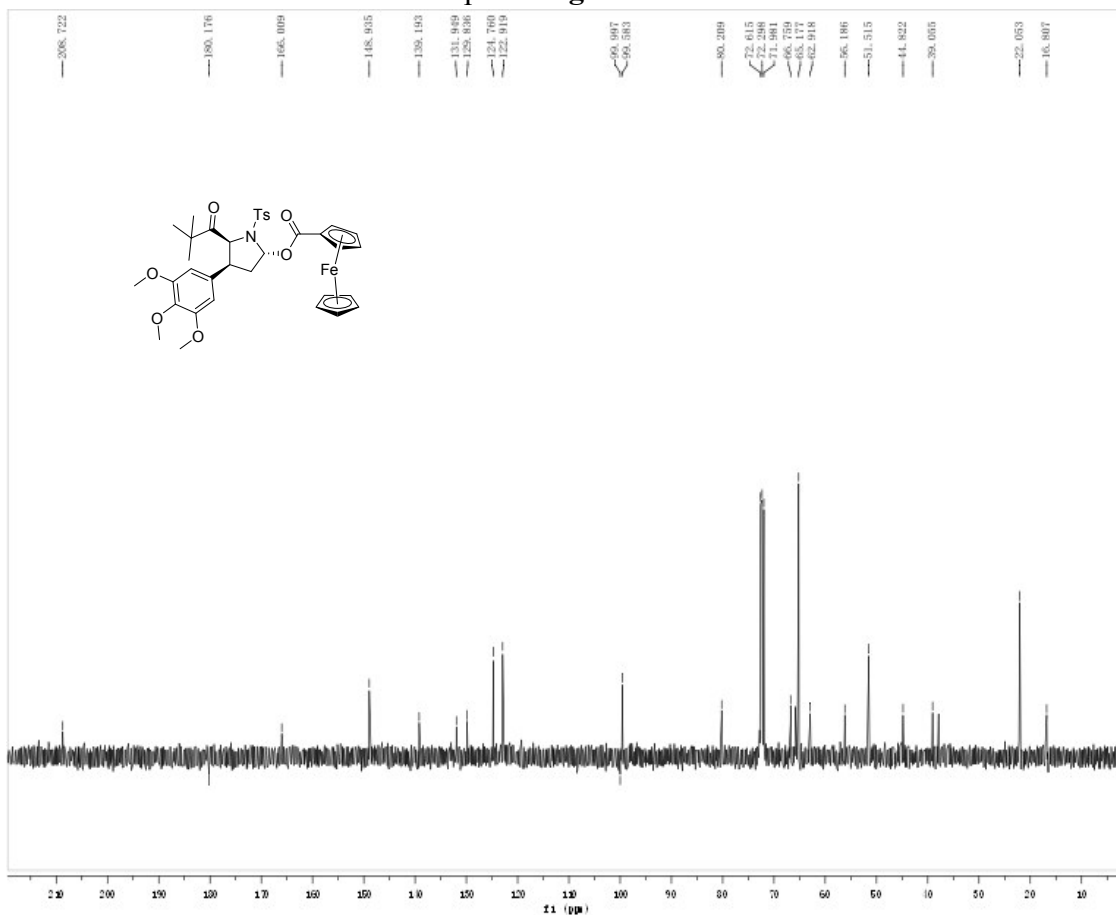

Compound 3gf <sup>13</sup>C NMR

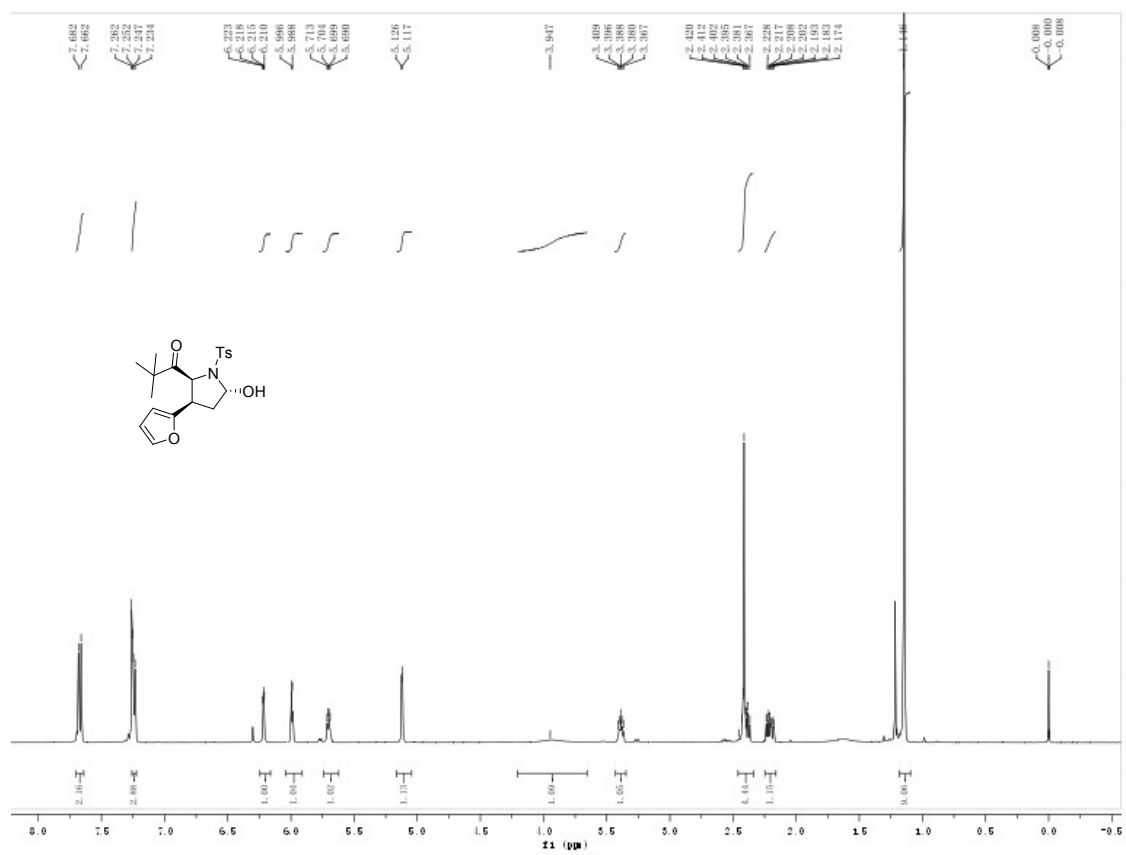

Compound **3hf** <sup>1</sup>H NMR

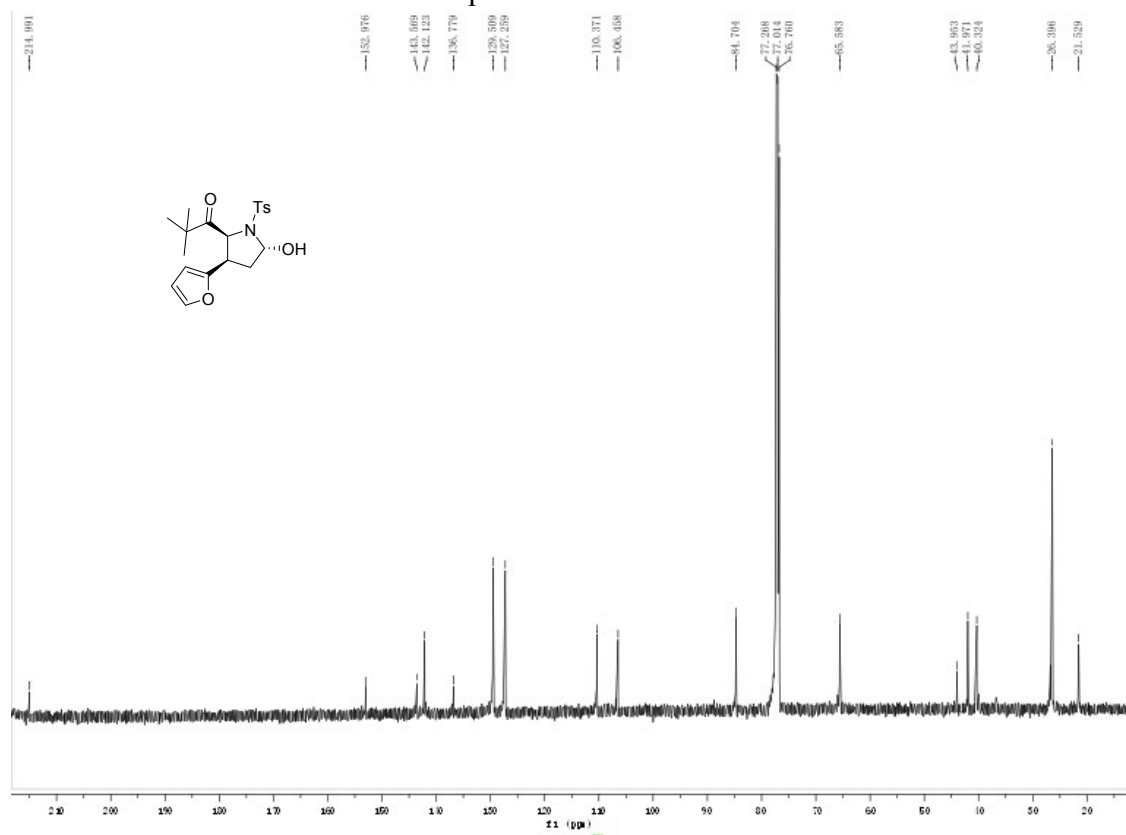

Compound **3hf** <sup>13</sup>C NMR

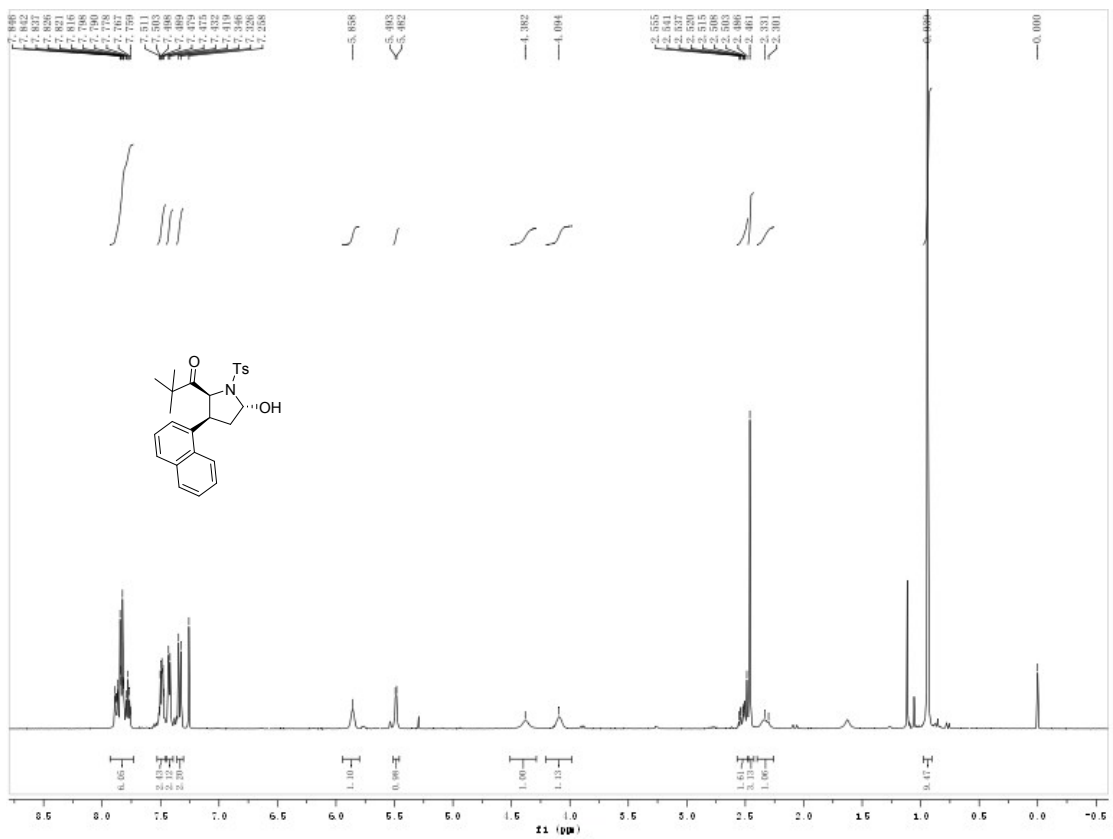

Compound 3if  $^1\text{H NMR}$

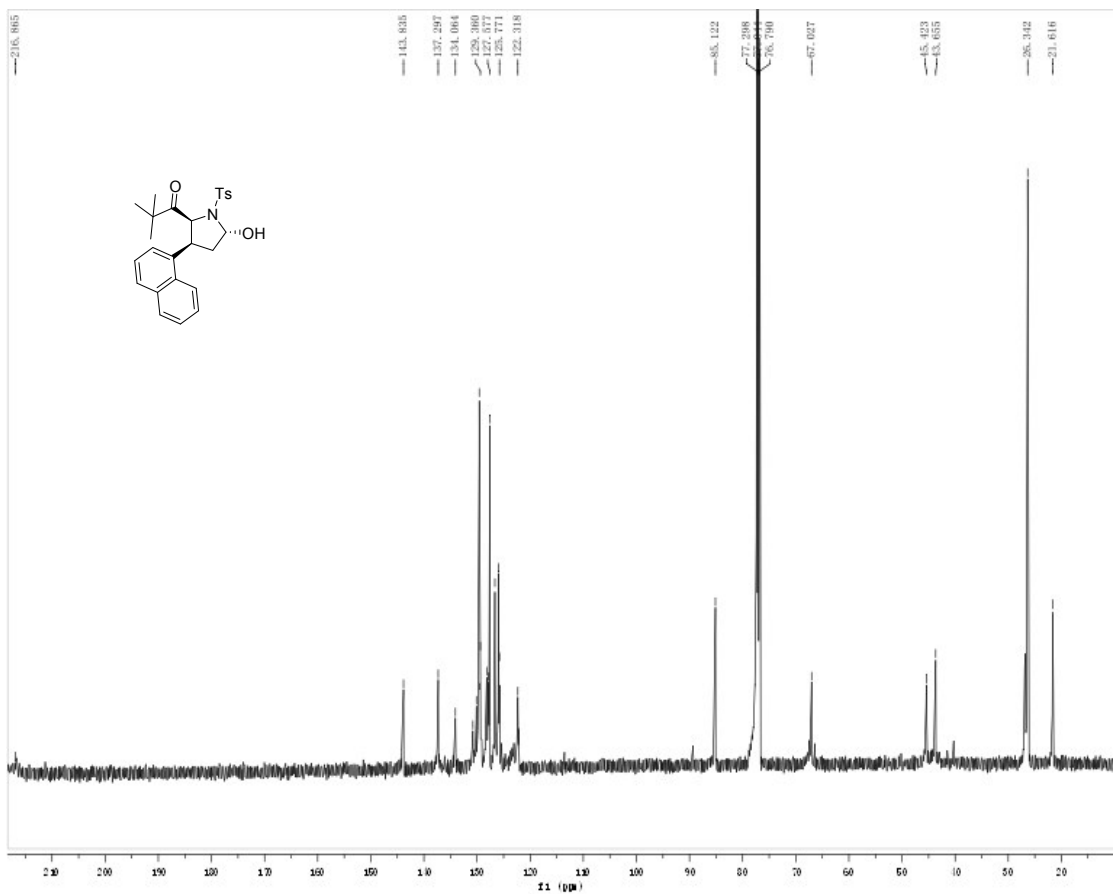

Compound 3if  $^{13}\text{C NMR}$



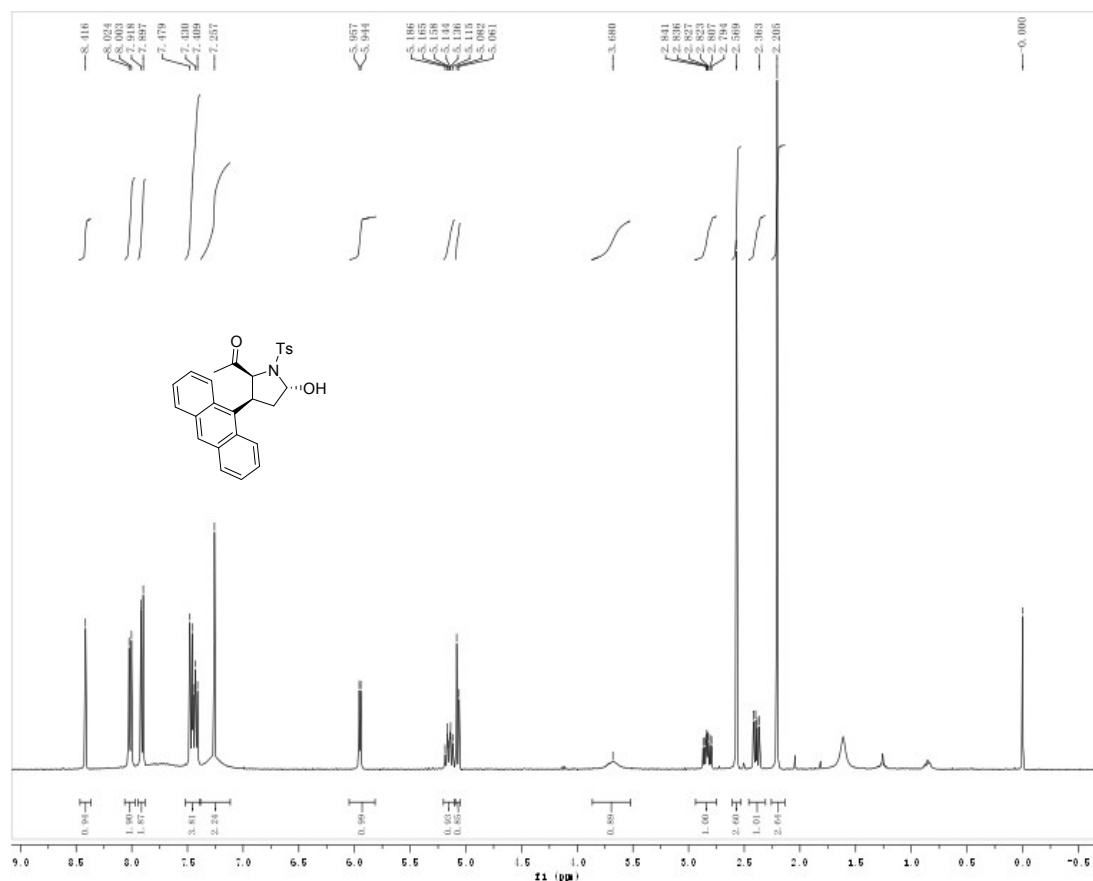

Compound 3ja <sup>1</sup>H NMR

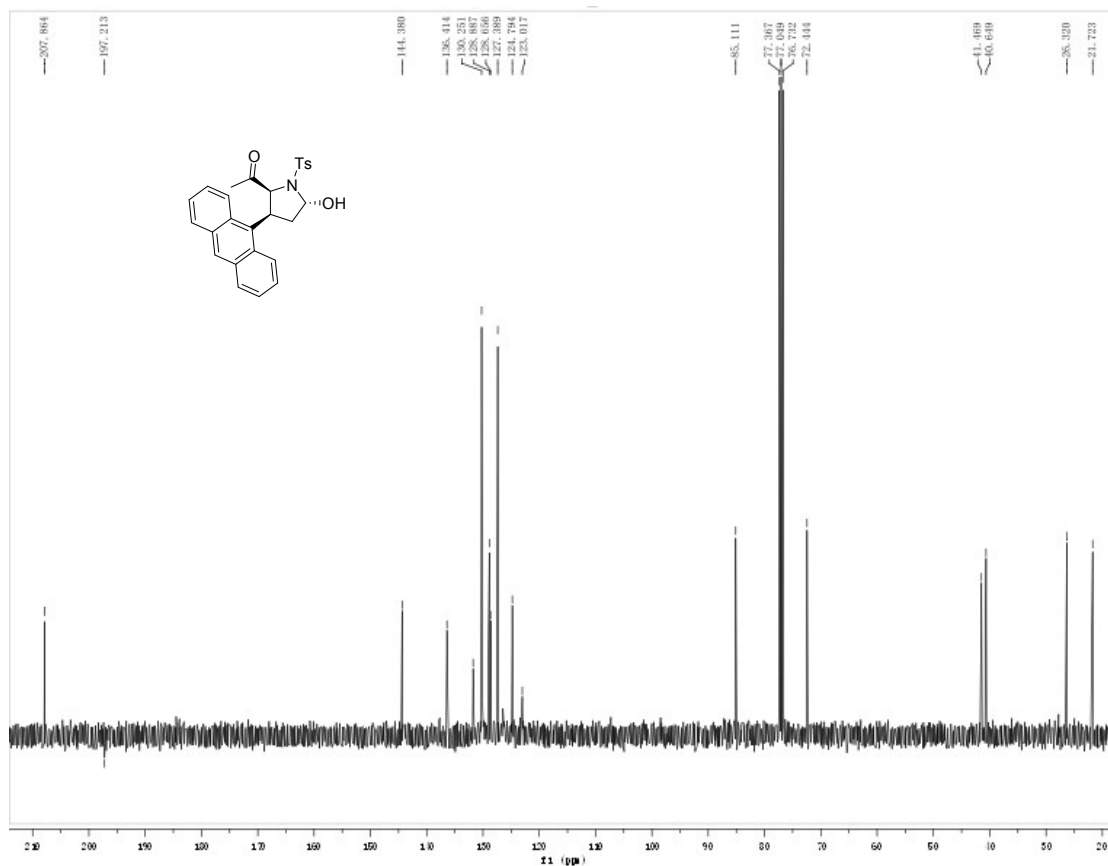

Compound 3ja <sup>13</sup>C NMR

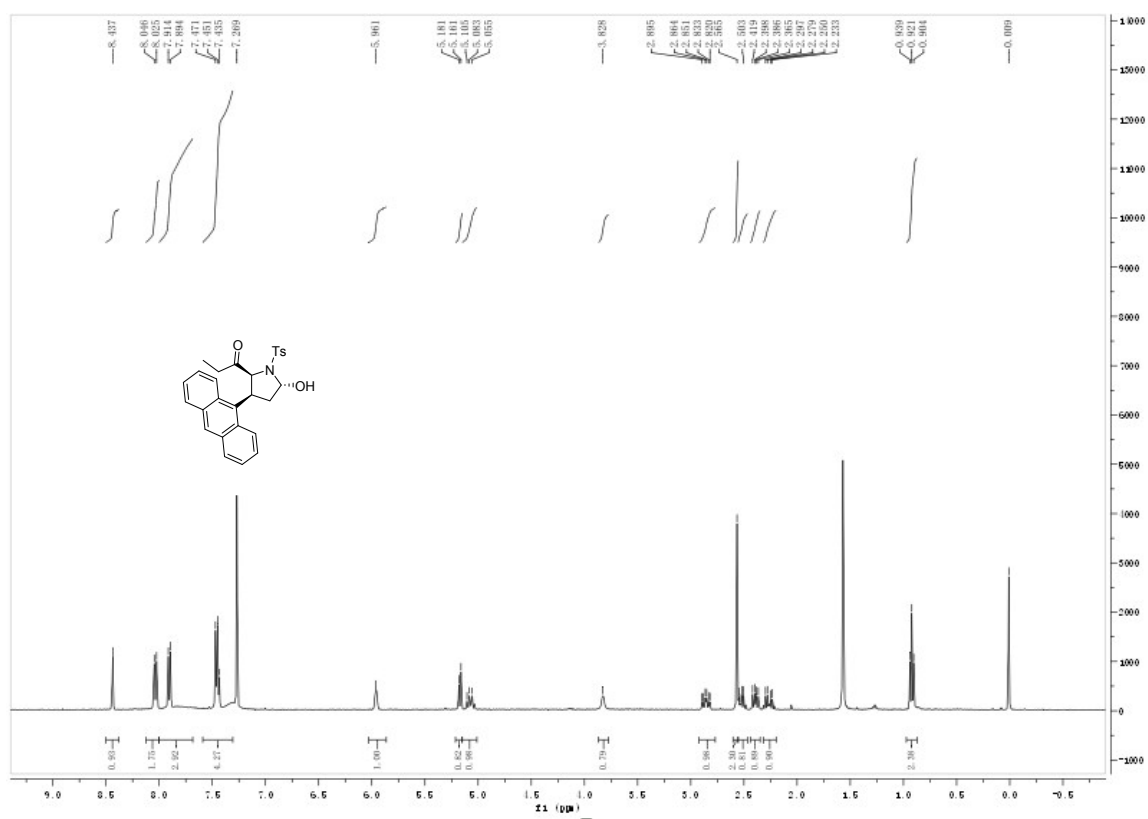

Compound 3jd  $^1\text{H}$  NMR

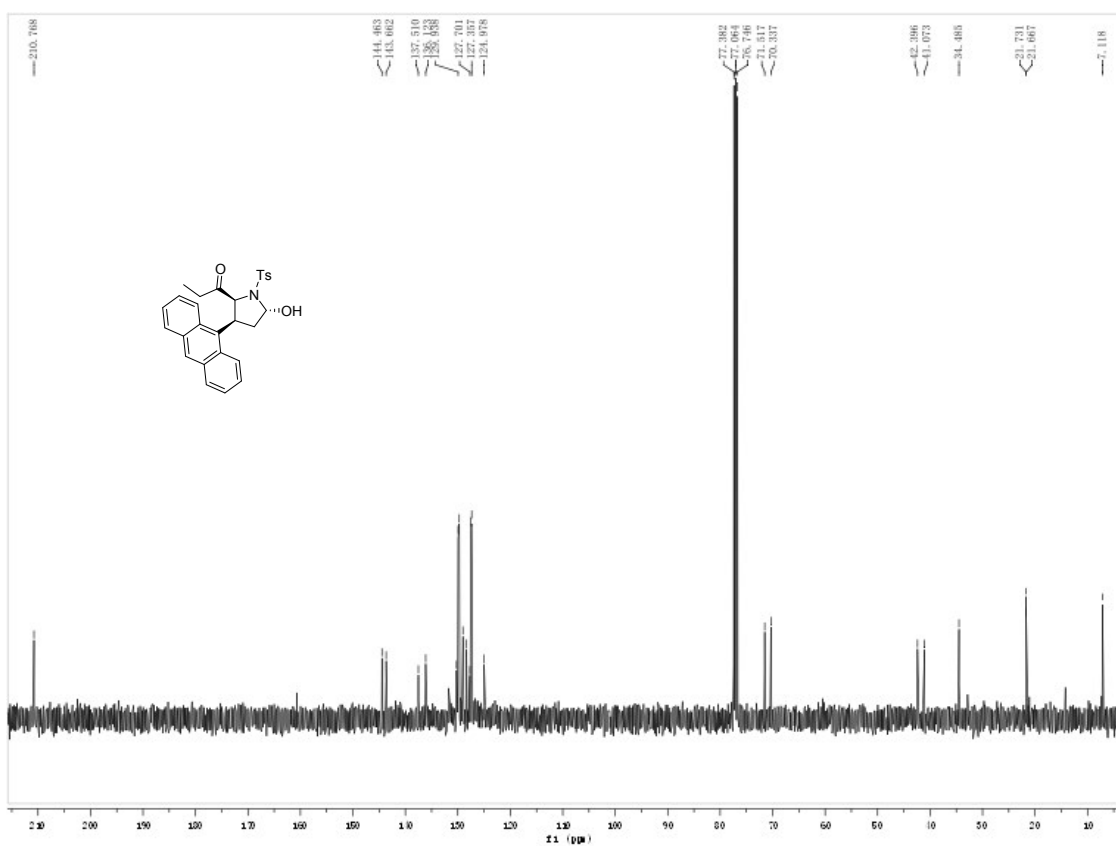

Compound 3jd  $^{13}\text{C}$  NMR

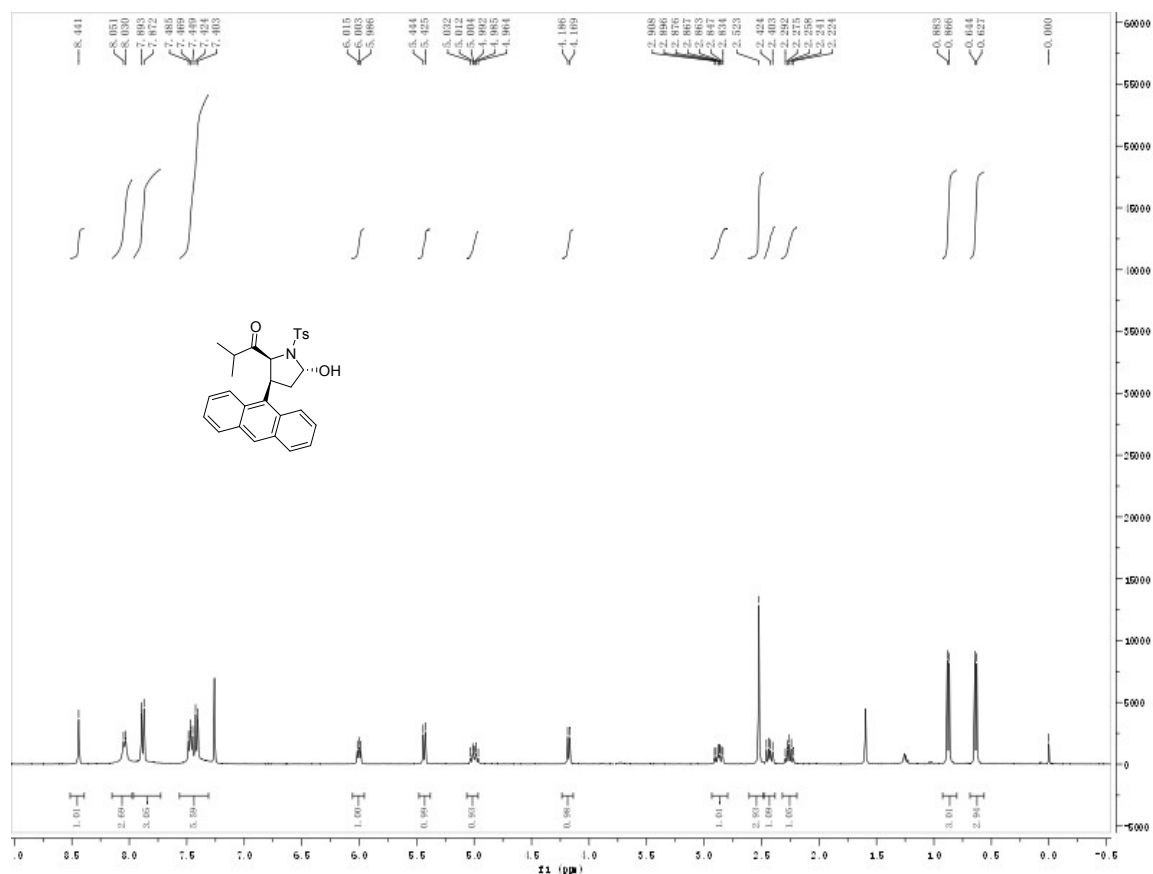

Compound 3je <sup>1</sup>H NMR

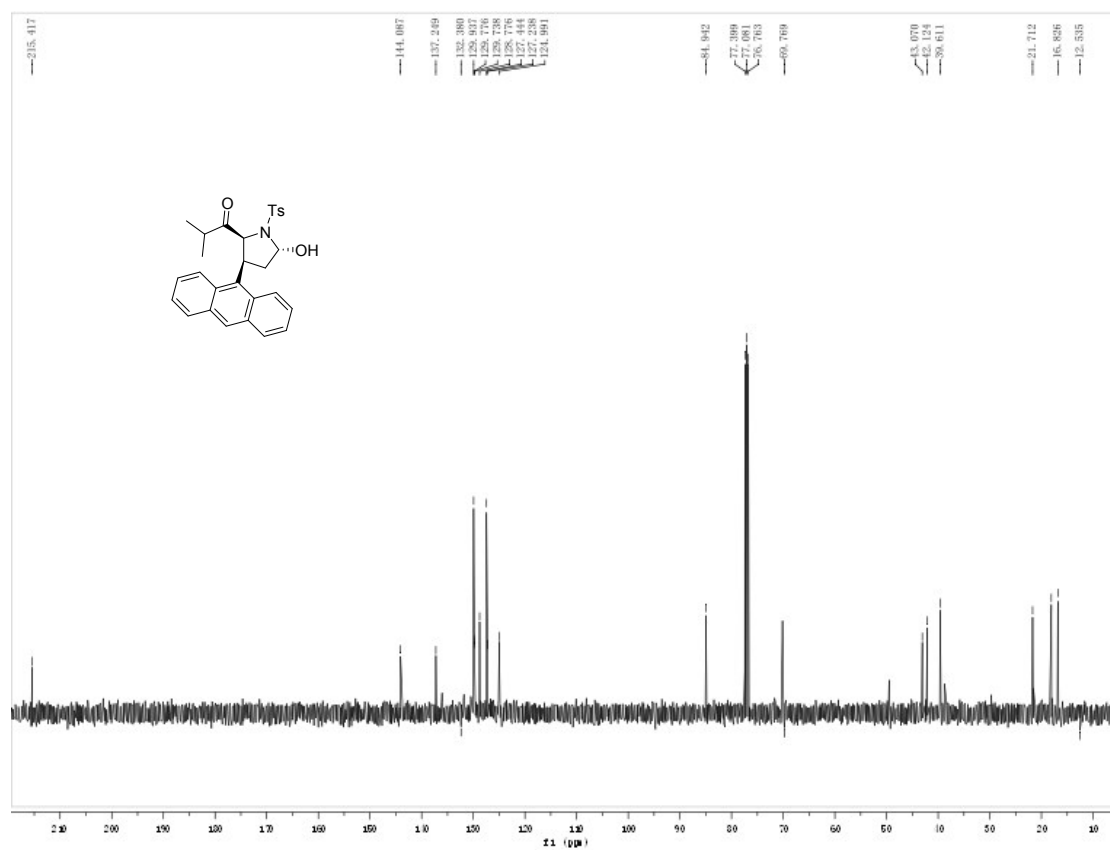

Compound 3je <sup>13</sup>C NMR

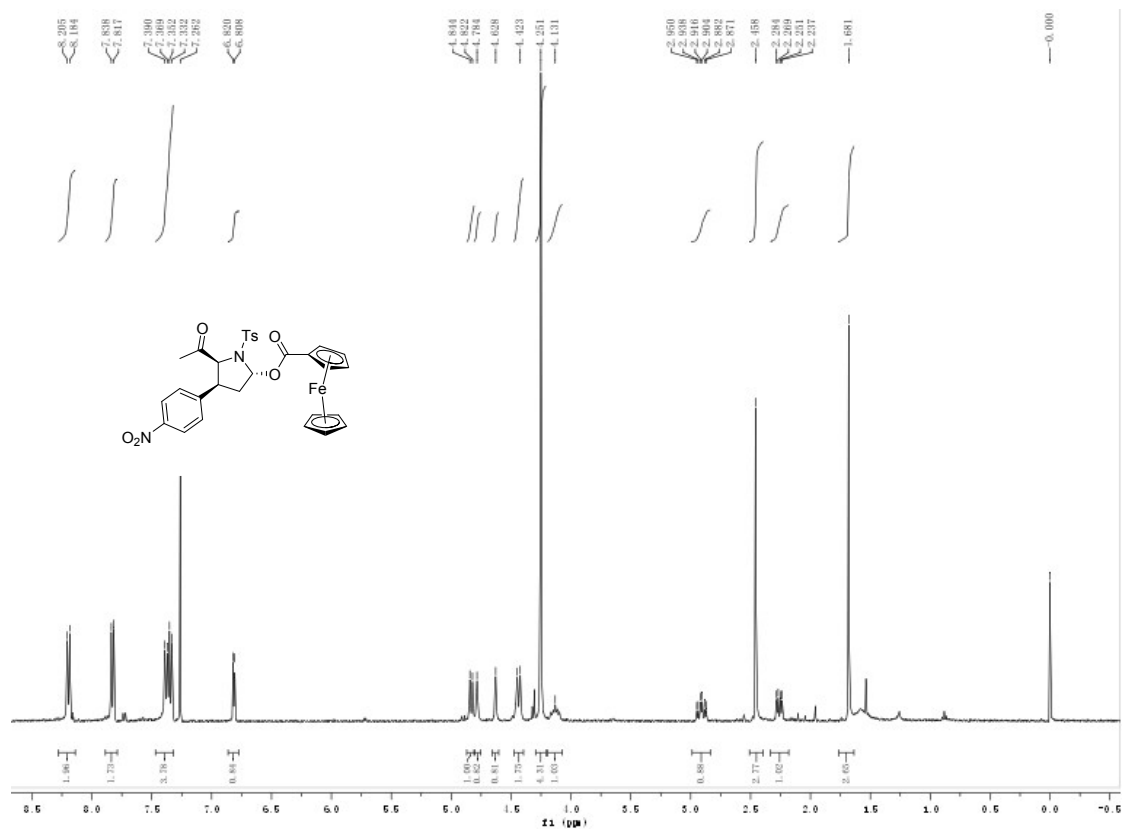

Compound 3ca <sup>1</sup>H NMR

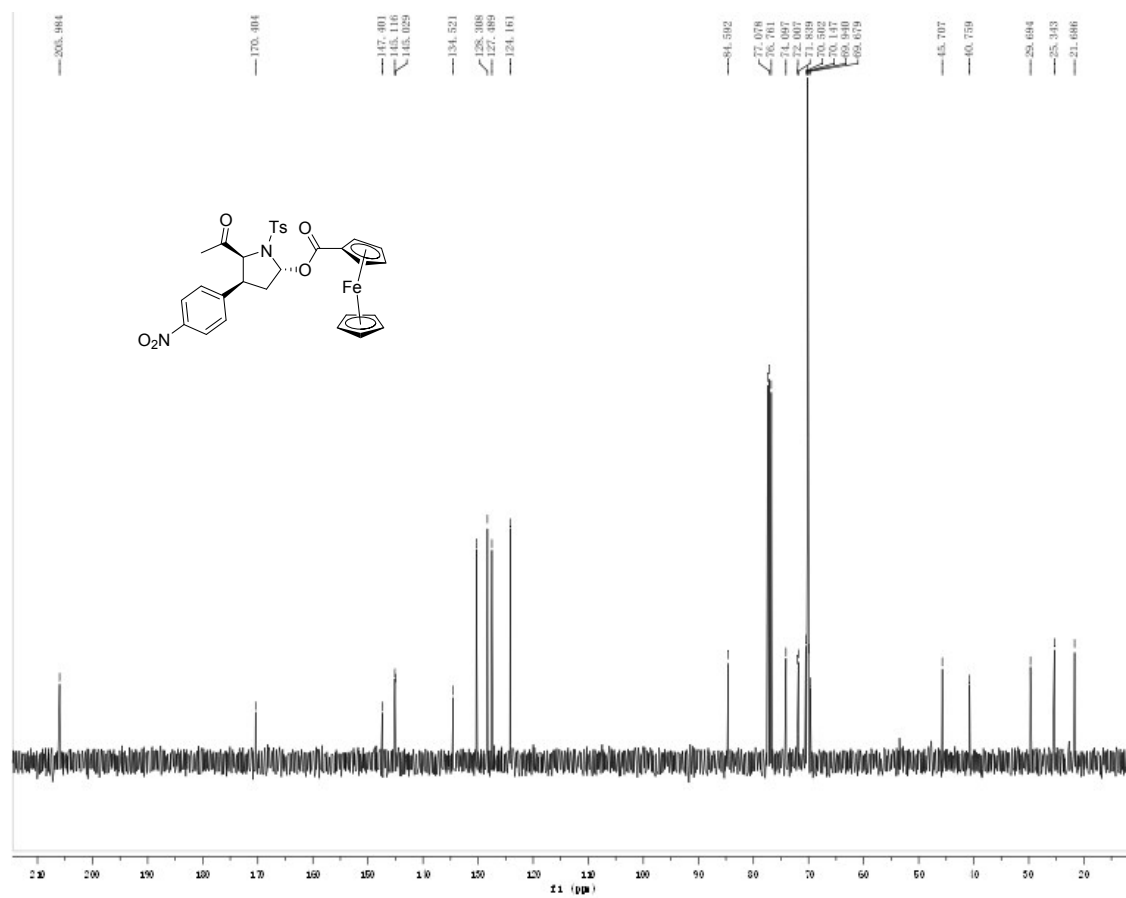

Compound 3ca <sup>13</sup>C NMR

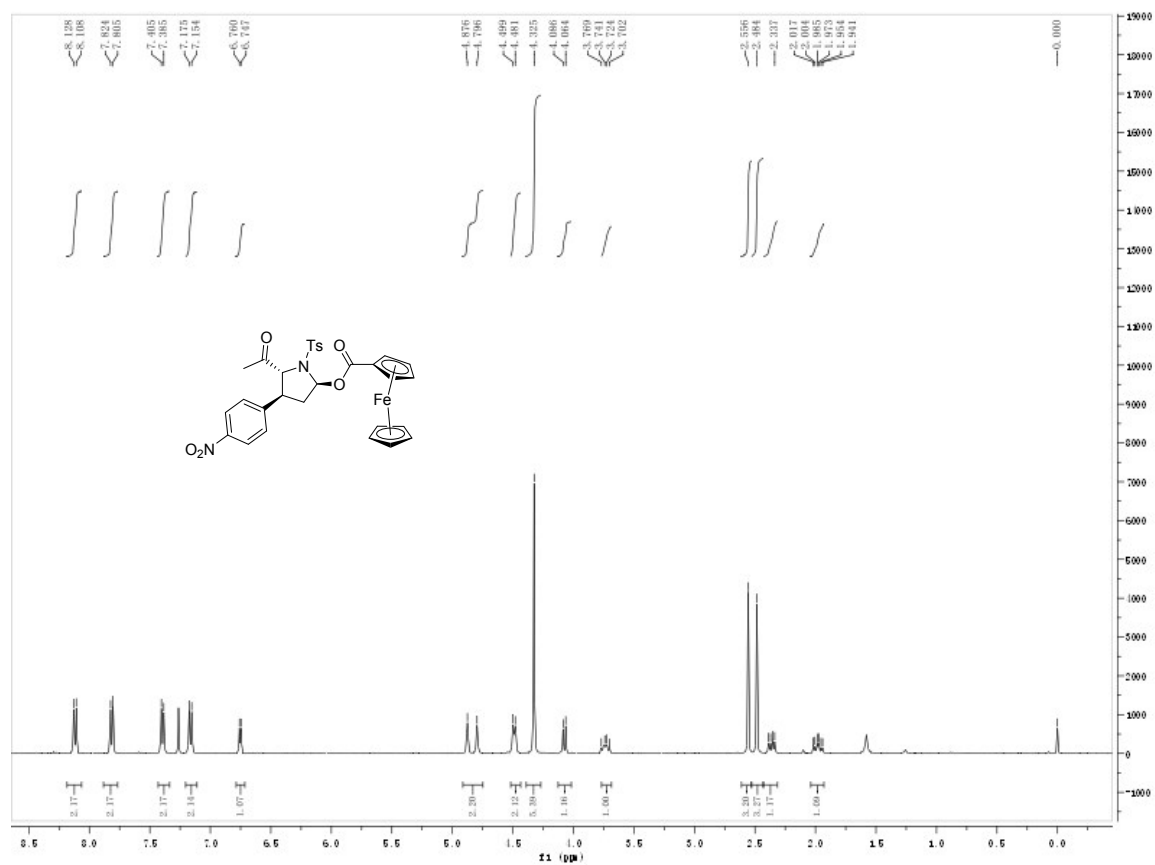

Compound 3ca' <sup>1</sup>H NMR

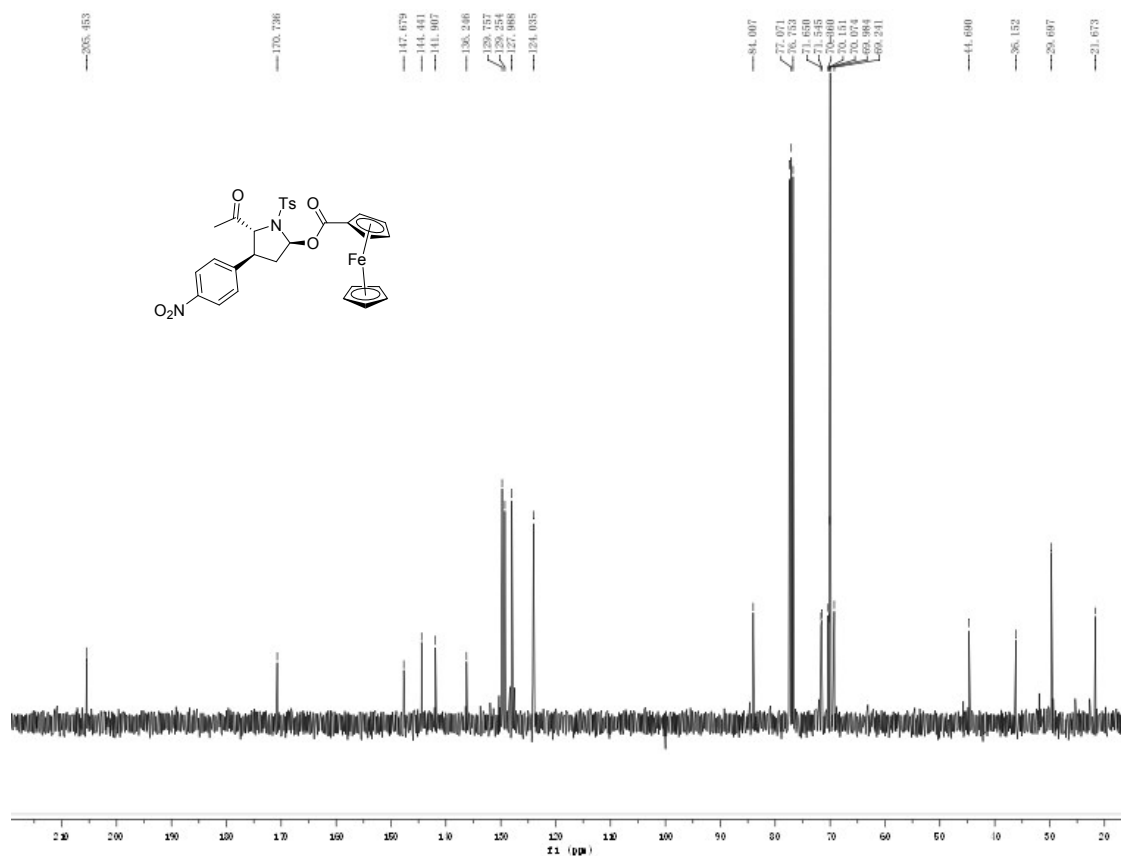

Compound 3ca' <sup>13</sup>C NMR

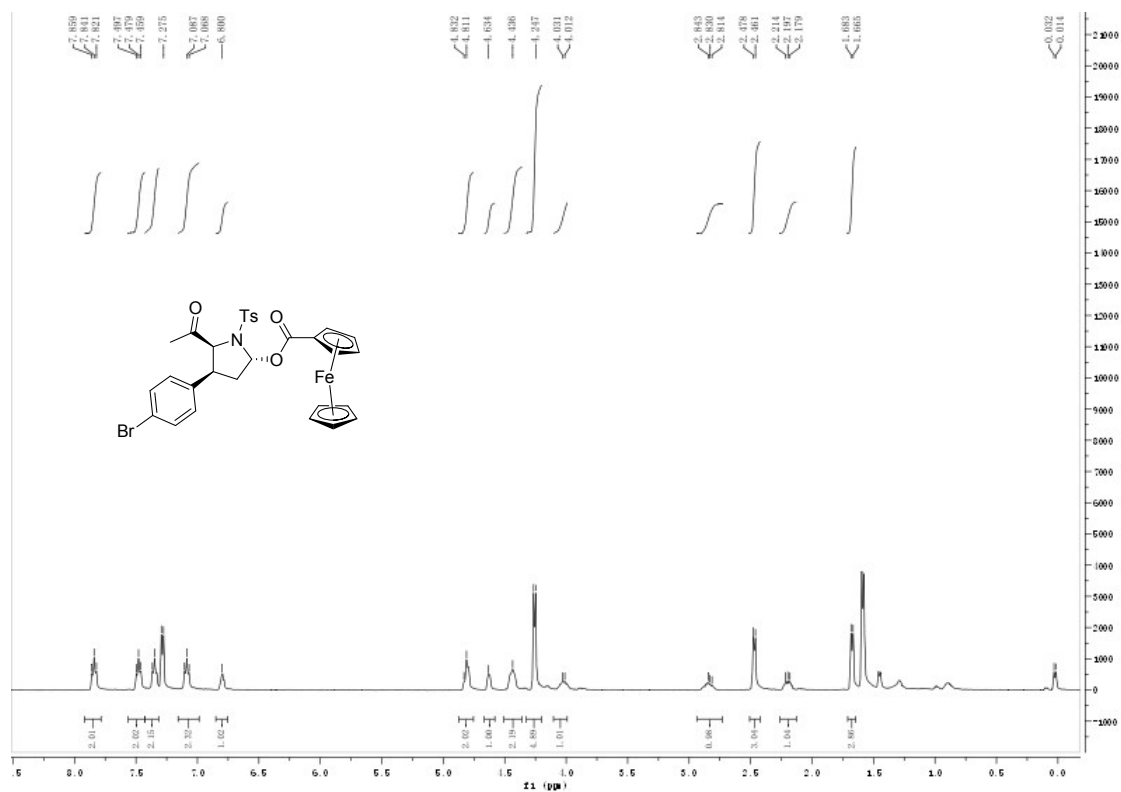

Compound 3da <sup>1</sup>H NMR

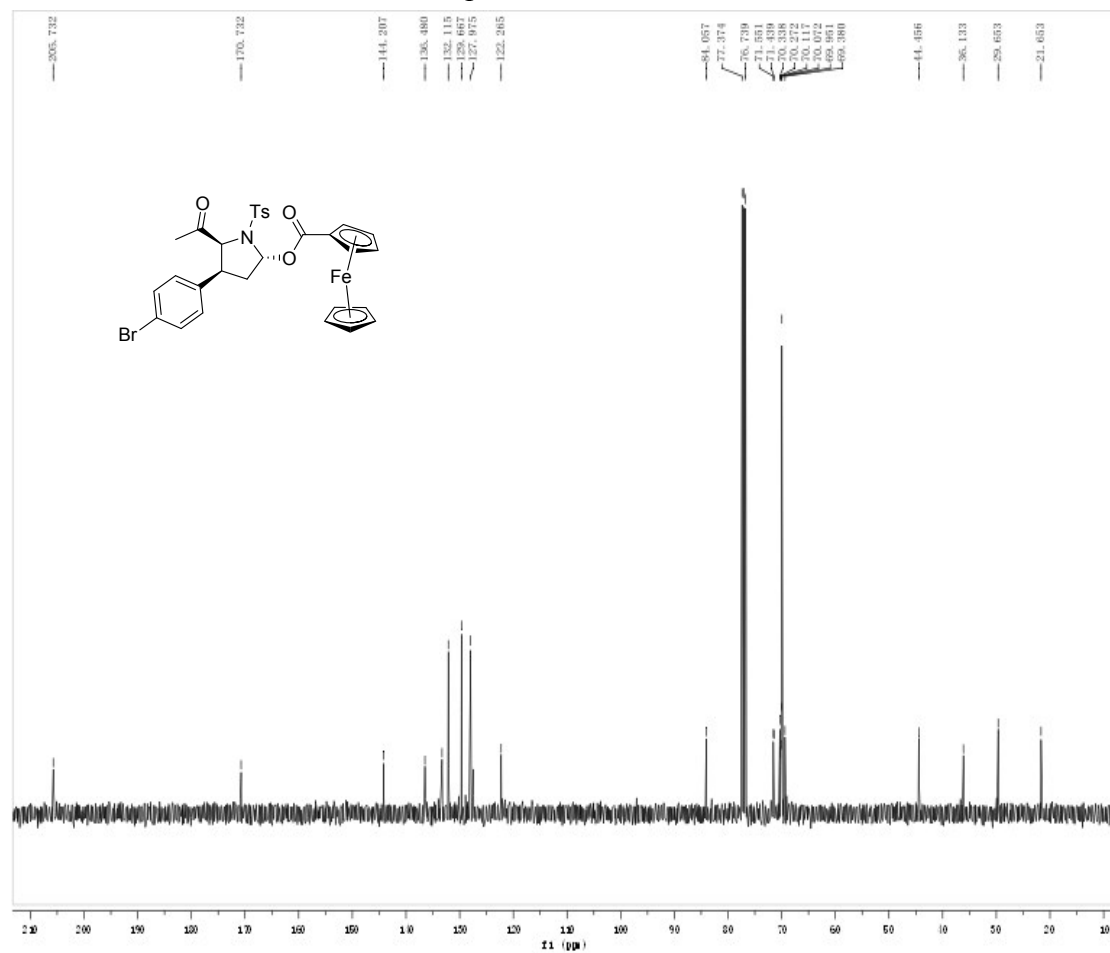

Compound 3da <sup>13</sup>C NMR

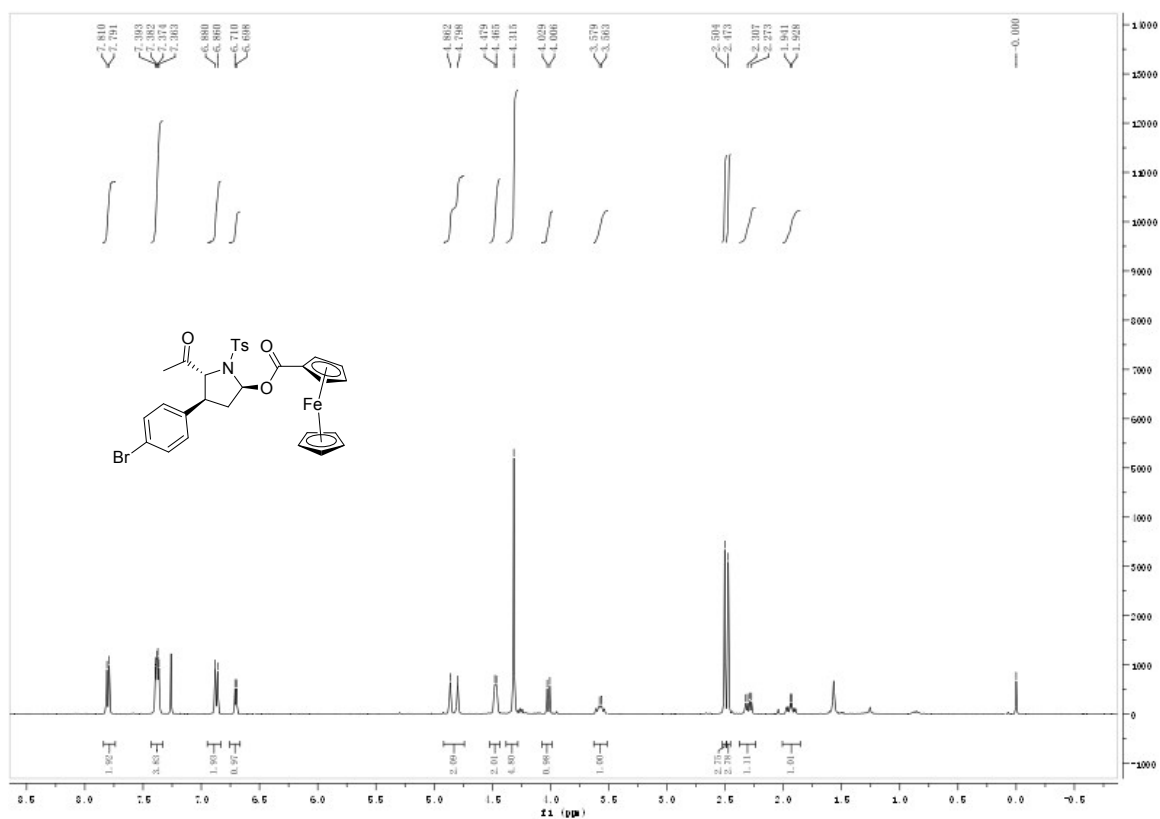

Compound 3da' <sup>1</sup>H NMR

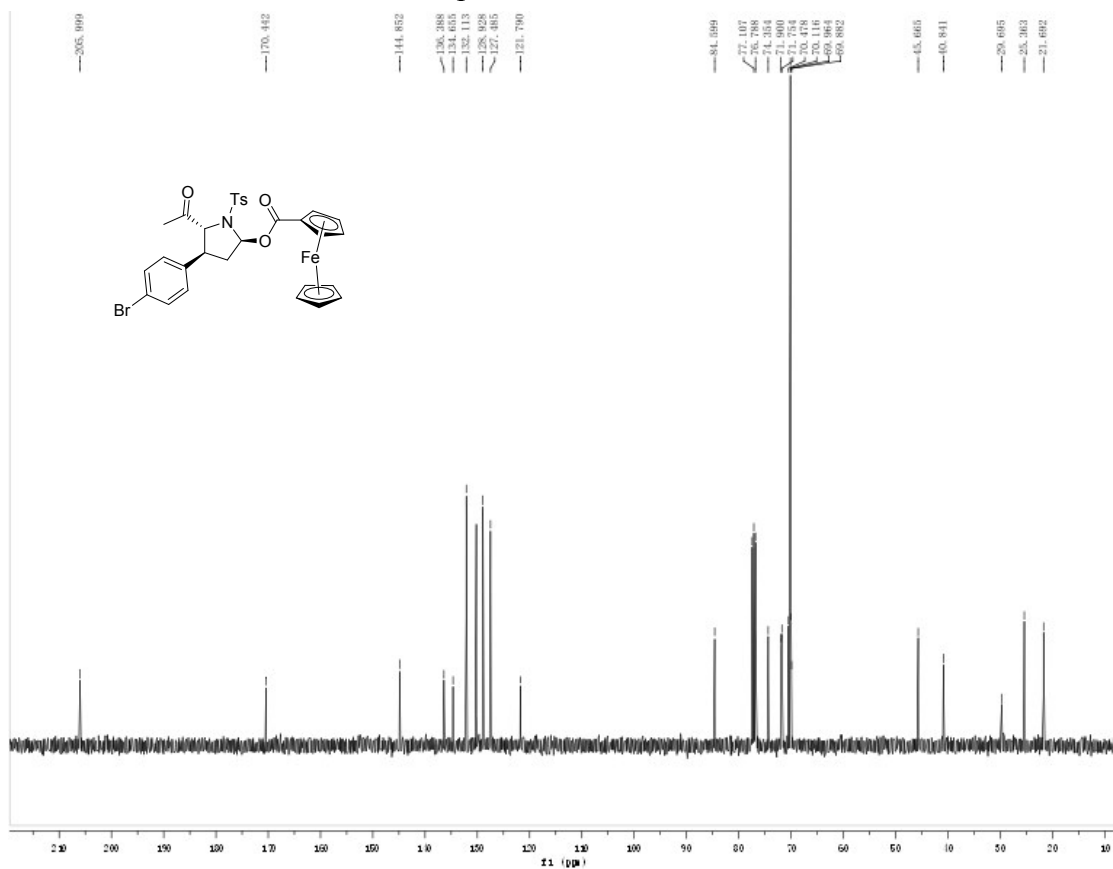

Compound 3da' <sup>13</sup>C NMR

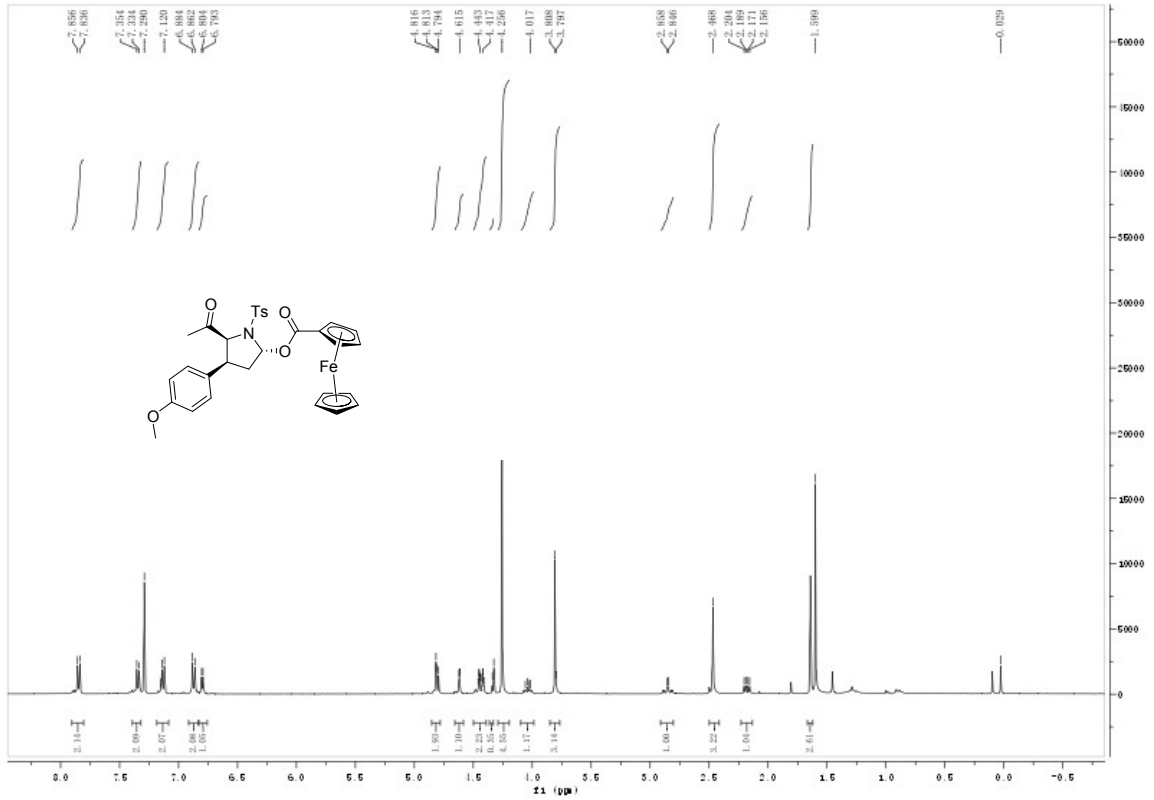

Compound 3fa <sup>1</sup>H NMR

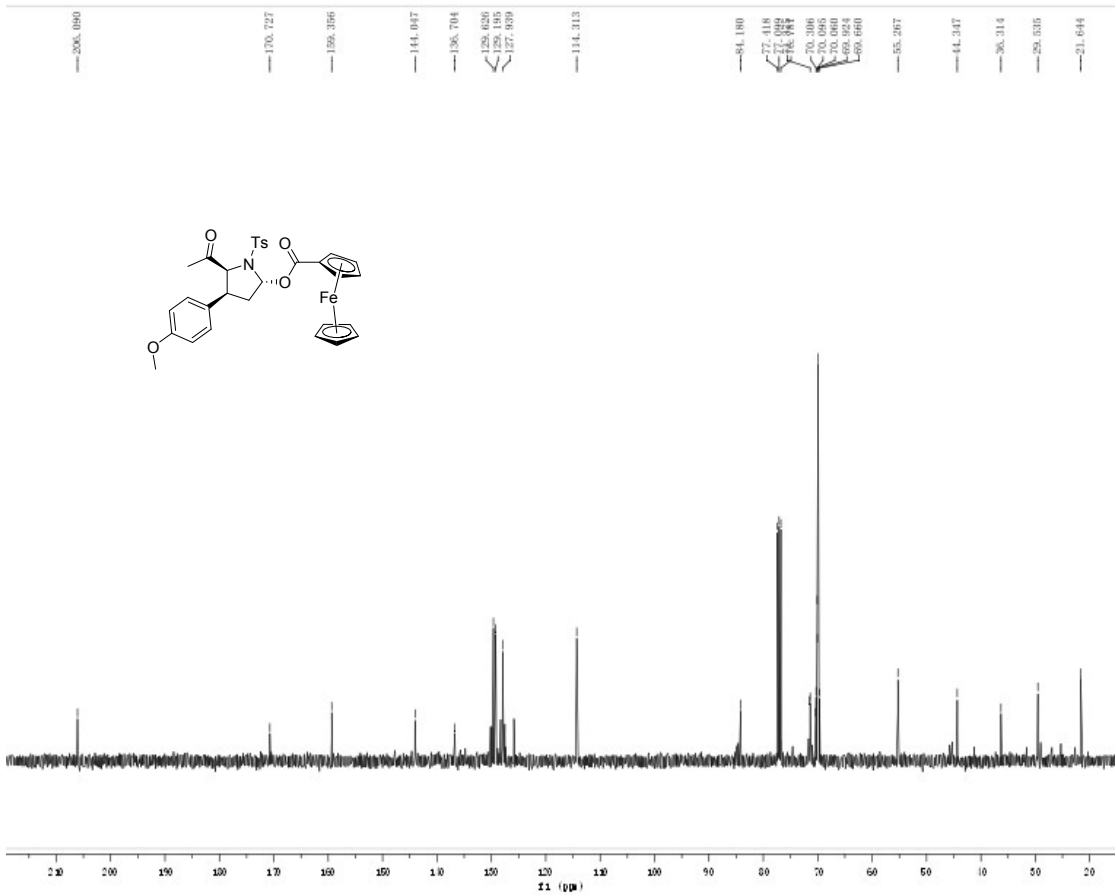

Compound 3fa <sup>13</sup>C NMR



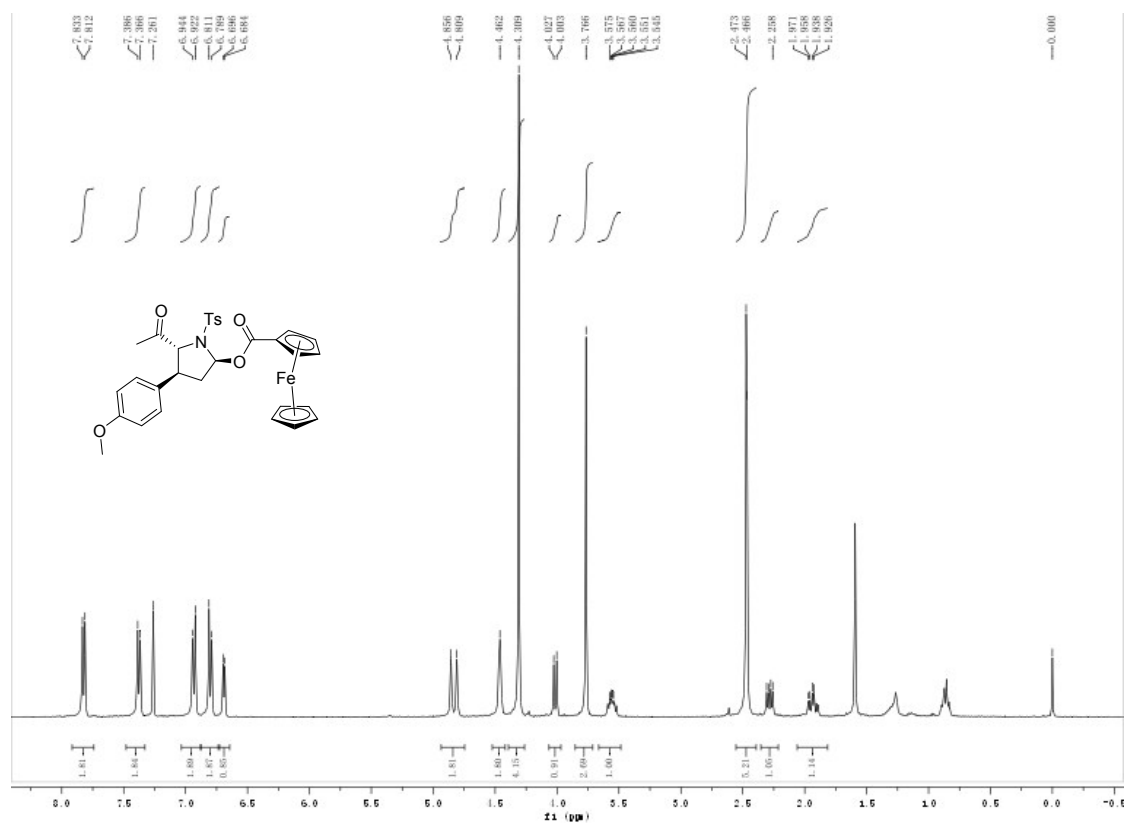

Compound 3fa' <sup>1</sup>H NMR

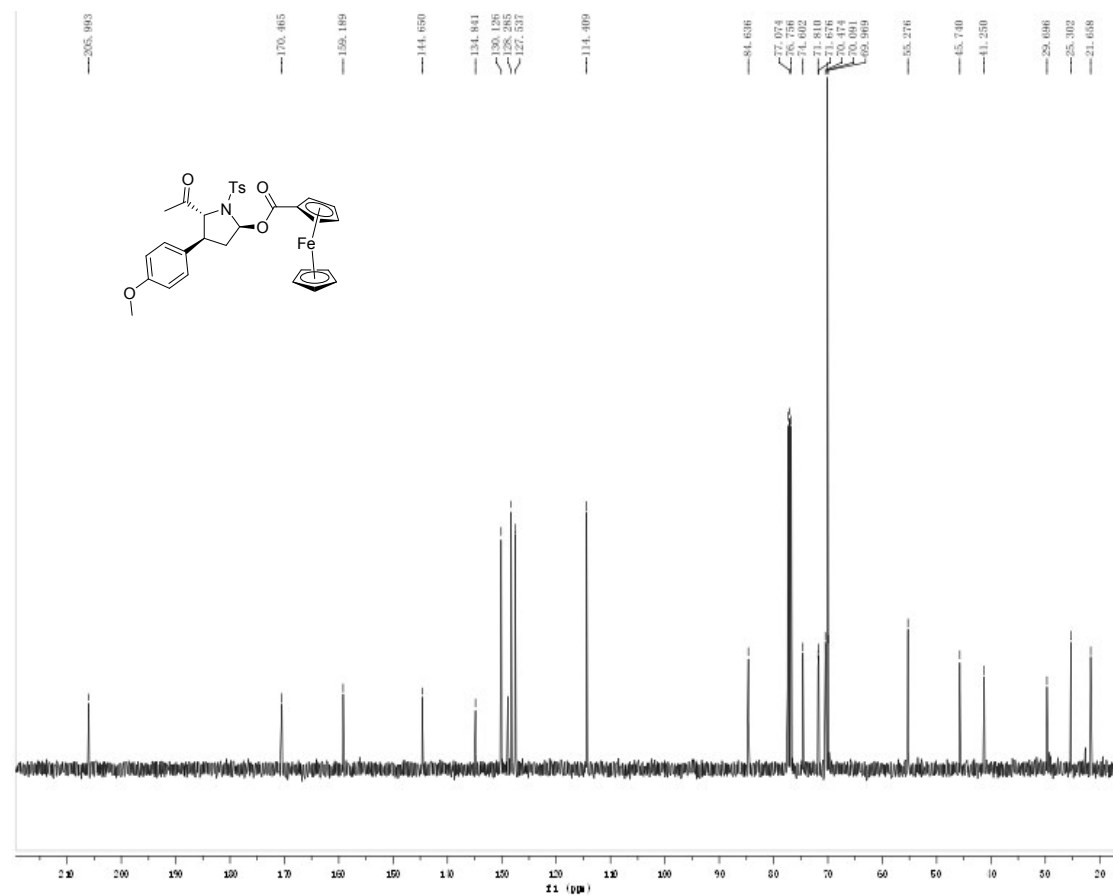

Compound 3fa <sup>13</sup>C NMR
